# Supplementary material for: A global phylogeny of Pelomedusoides turtles with new material ofNeochelys franzeniSchleich, 1993 (Testudines, Podocnemididae) from the middle Eocene, Messel Pit, of Germany
Source: PeerJ journal article supplement (doi:10.7717/peerj.1221), 2015-08-27
Supplement: SupplementInfo1.pdf [file SupplementInfo1.pdf]

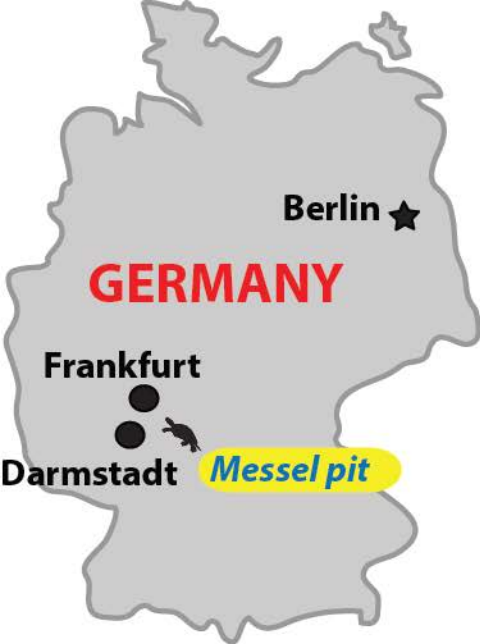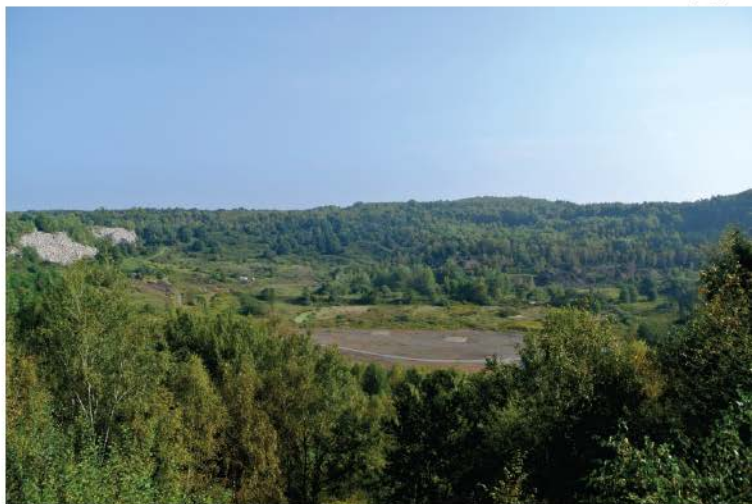

**A**

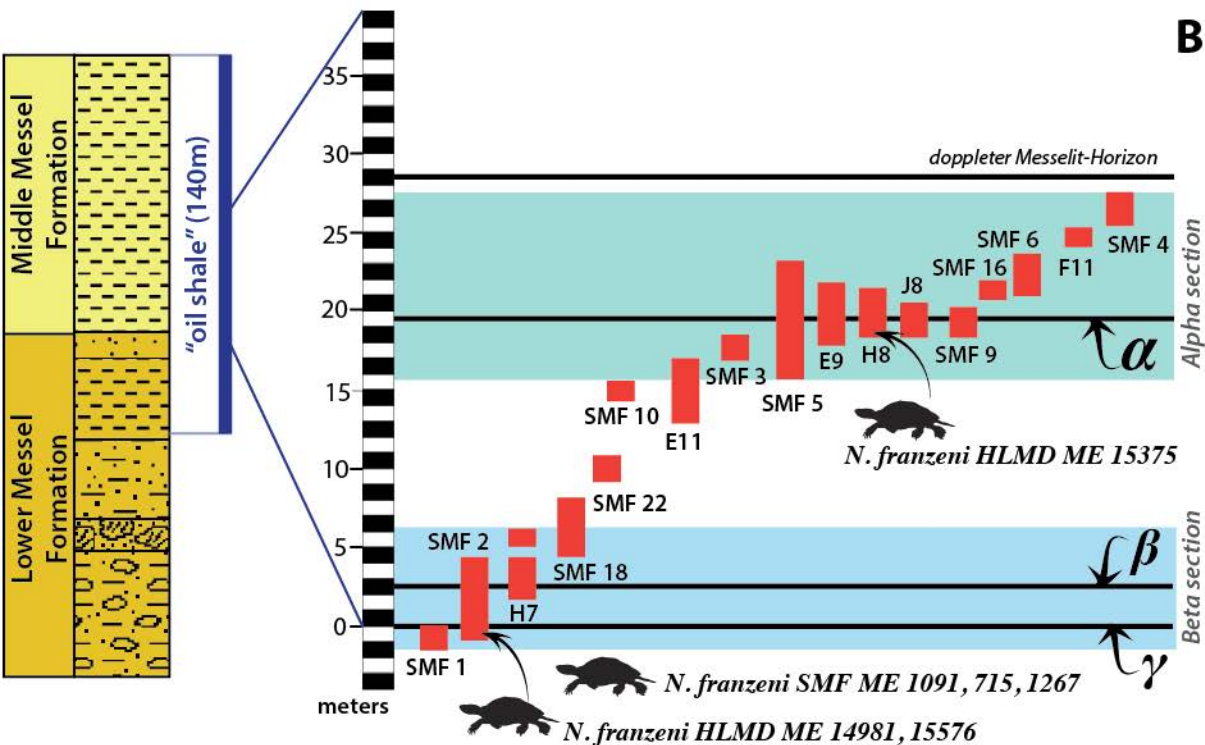

**B**

-  "Messel oil shale"
-  fine gravel to clay, tuff, mostly graded
-  sand, gravel with oil shale
-  amphibolite blocks, graded matrix with sand and clay



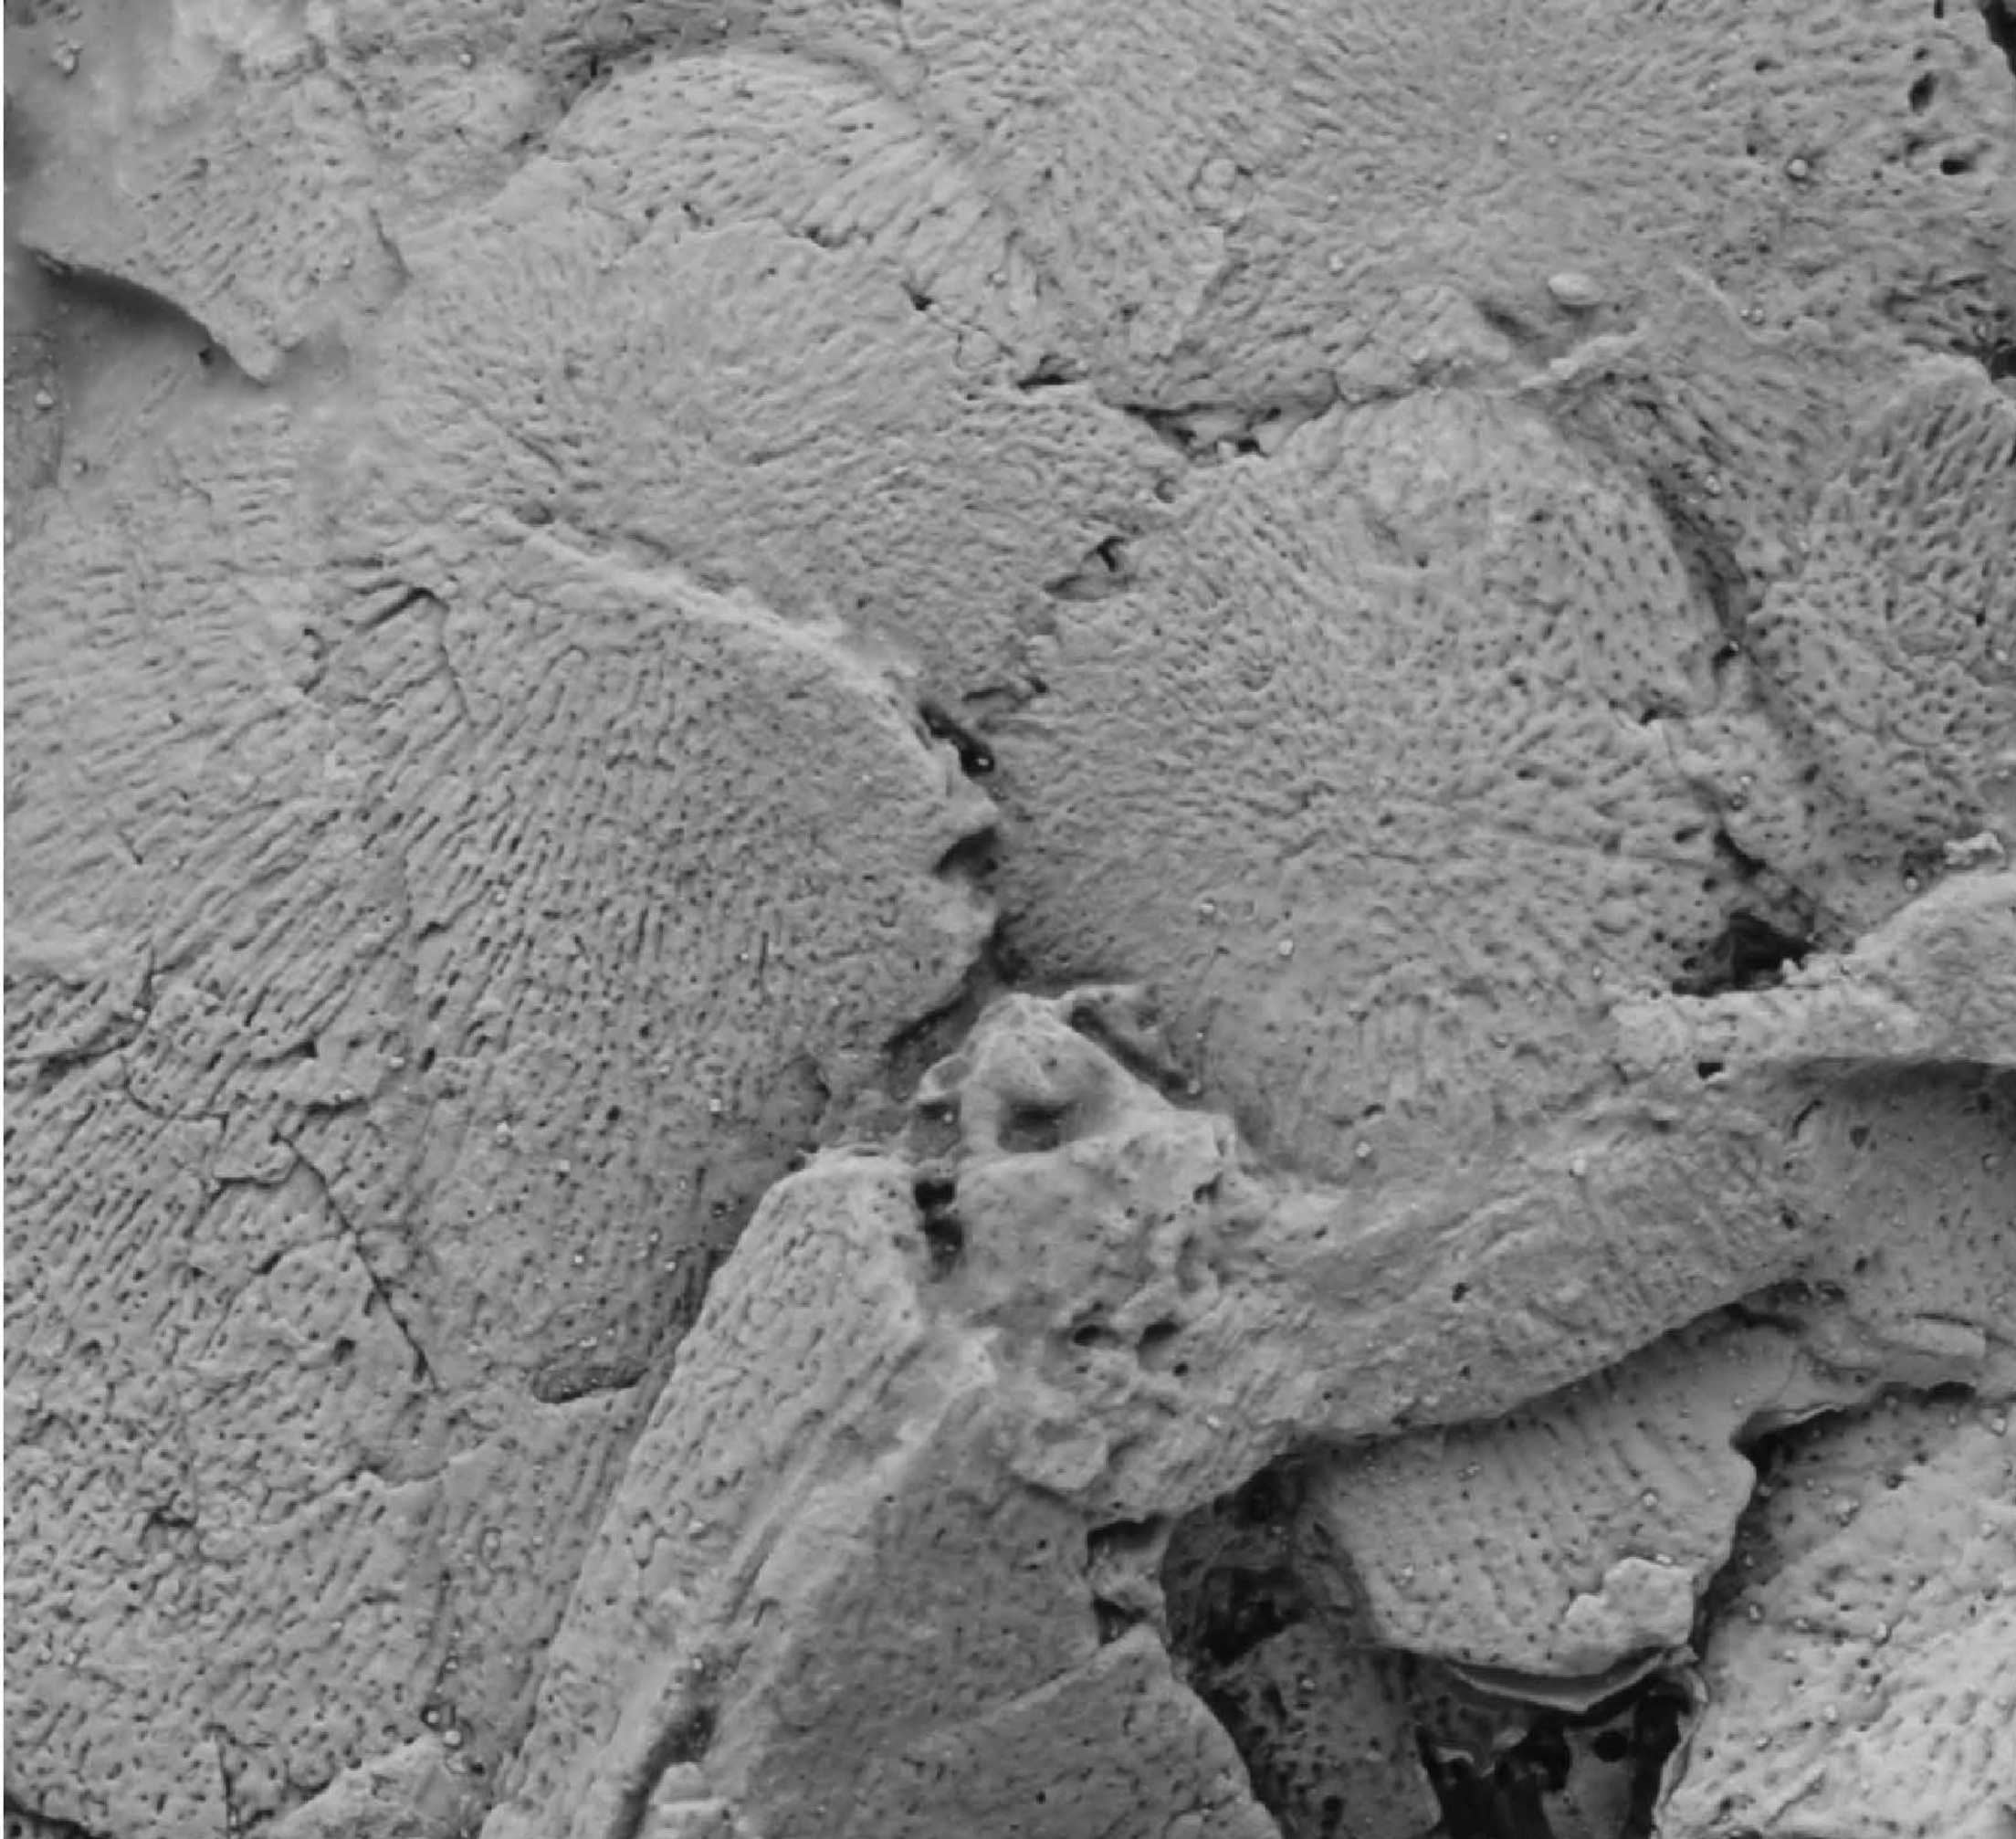

Skull interparietal scute/bone sculpture

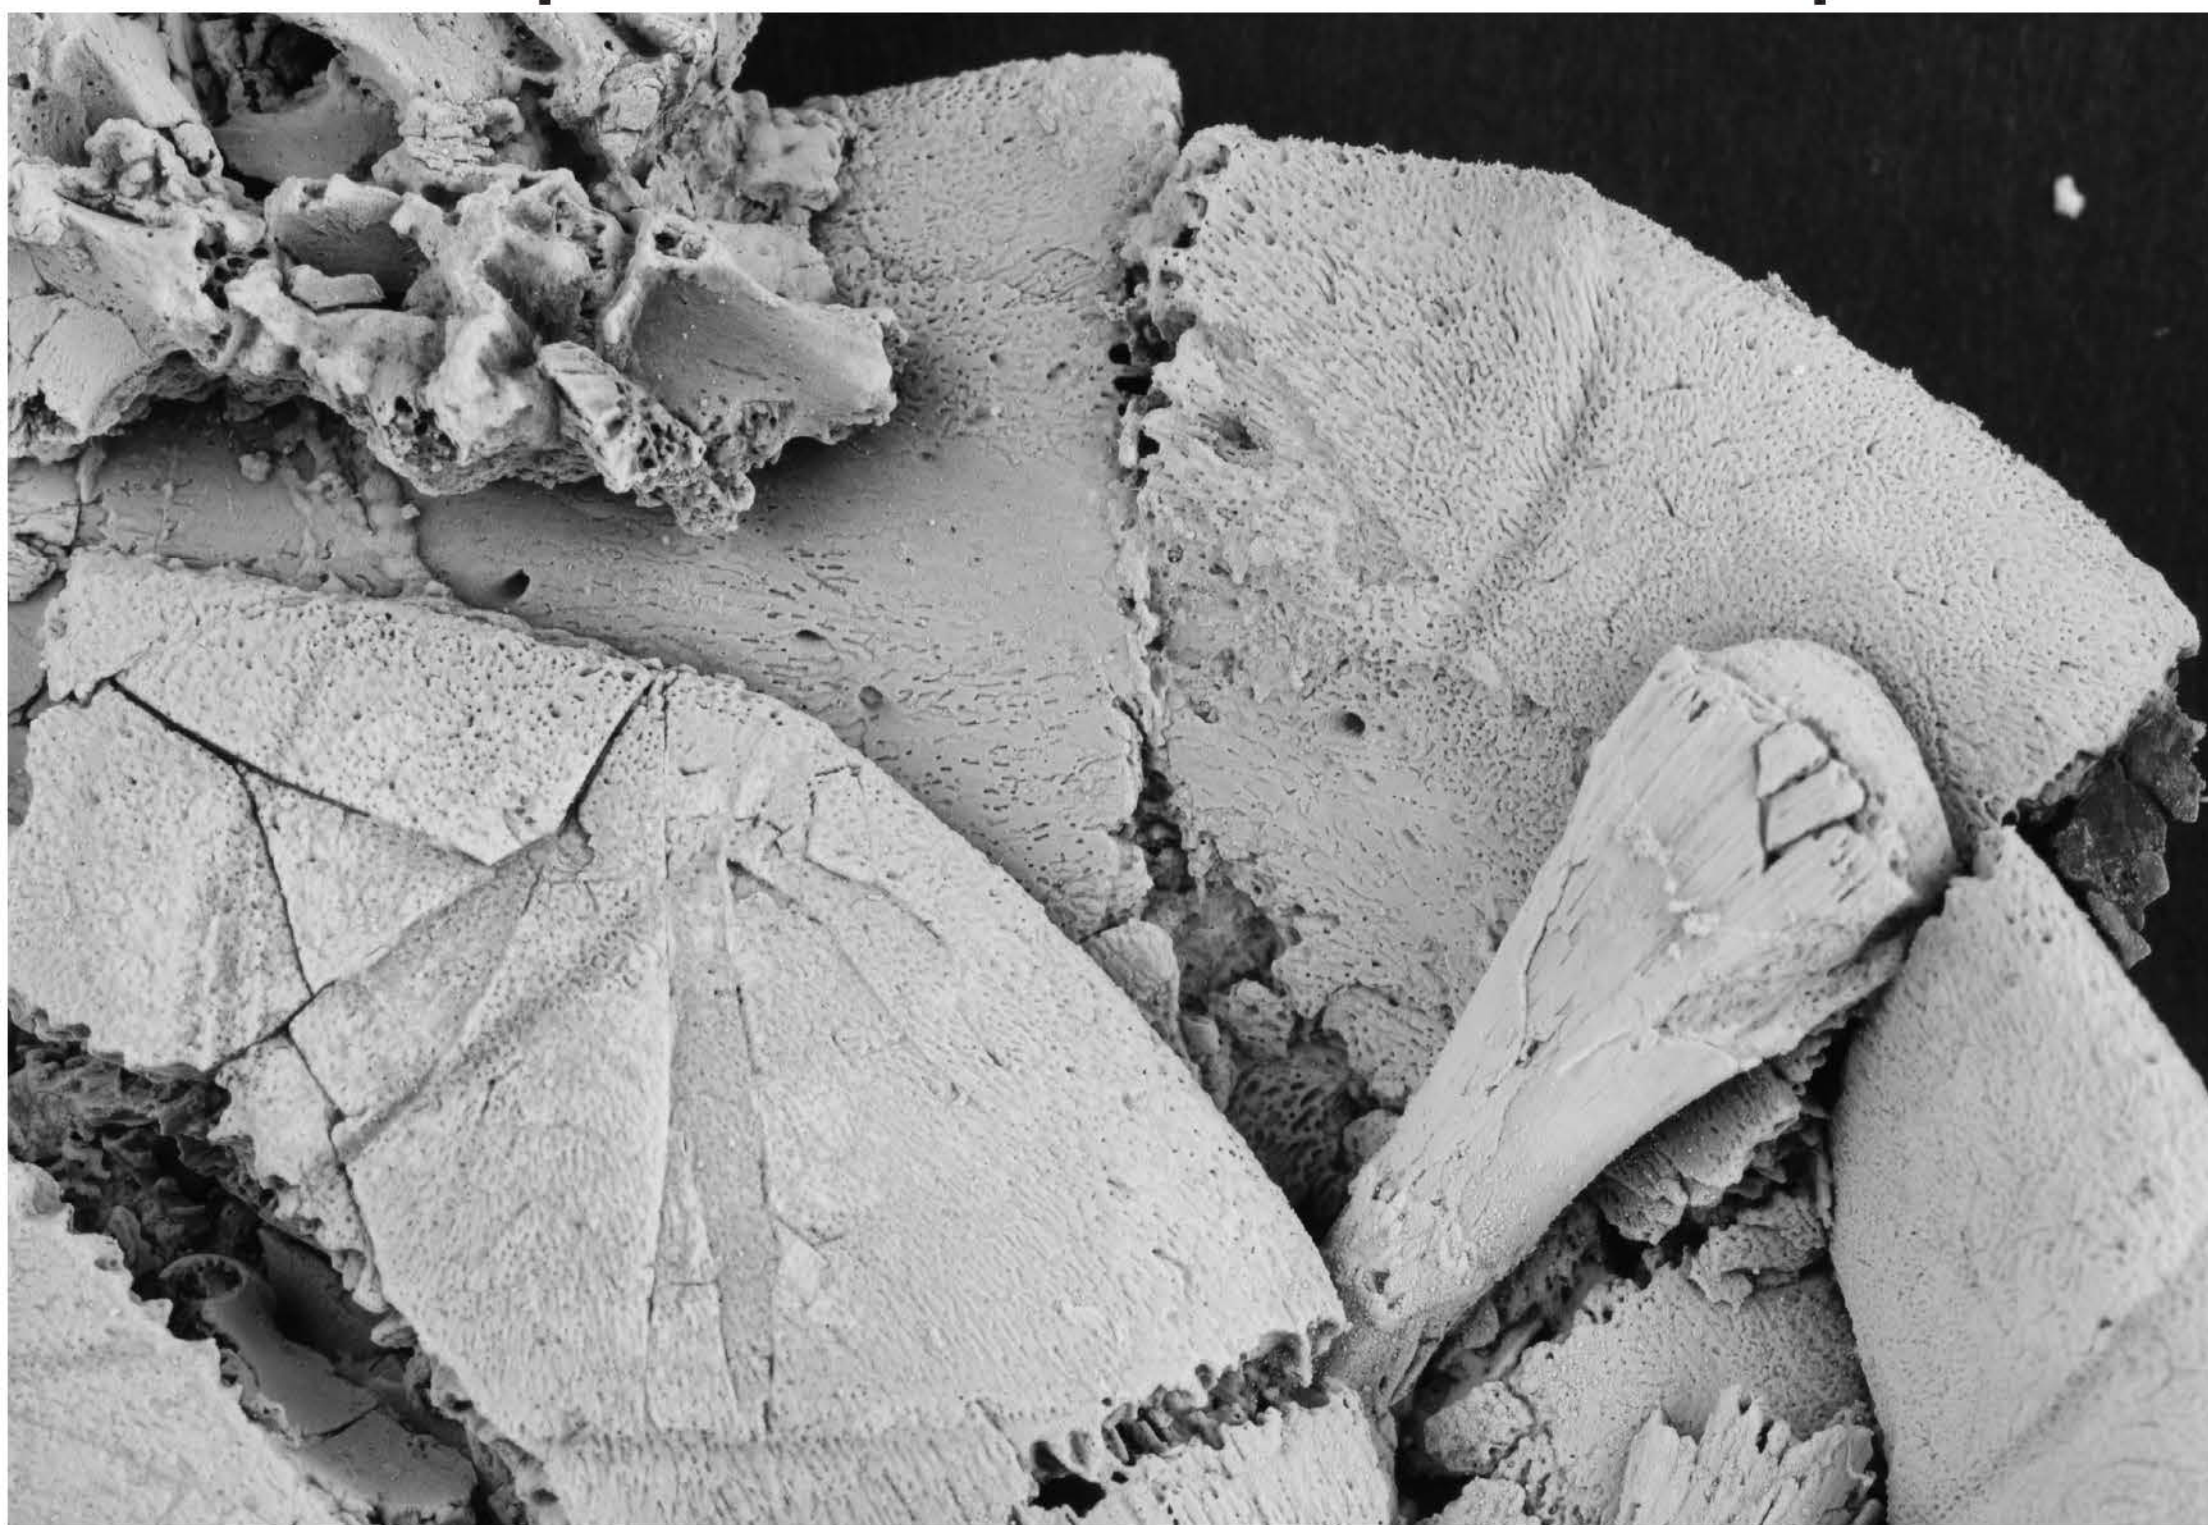

Left epiplastron, humerus, cervicals

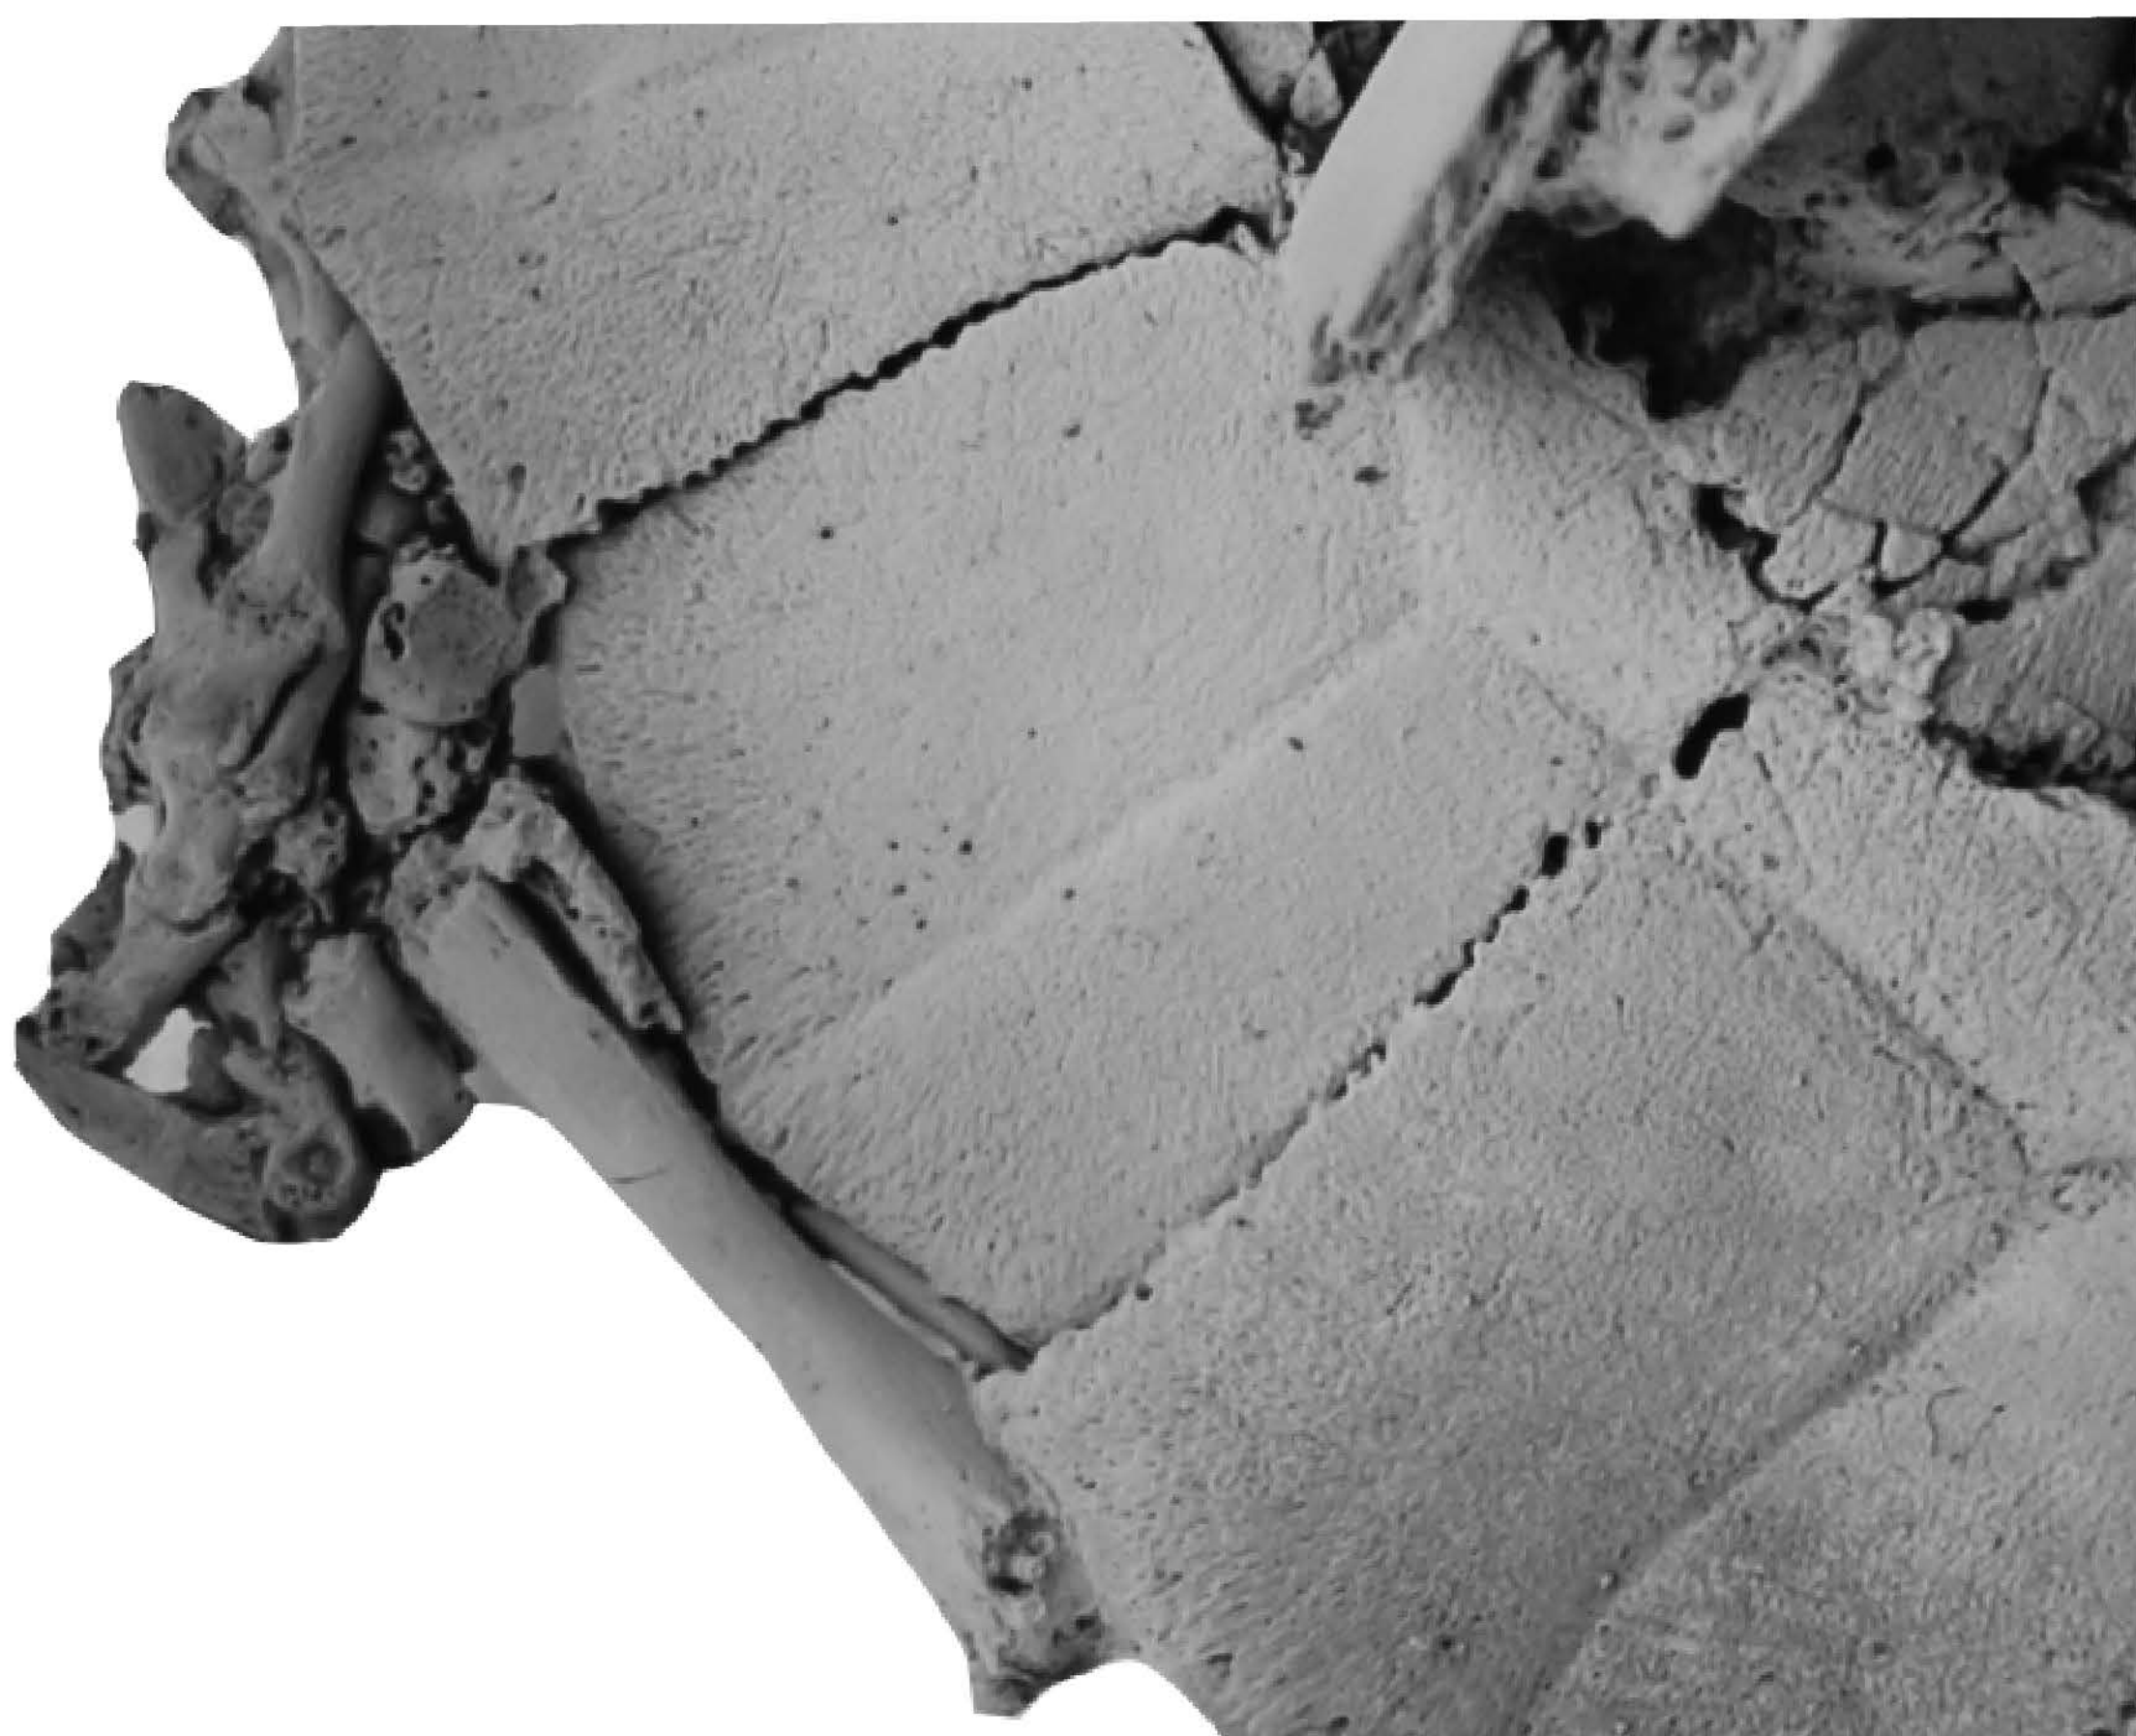

Right pes elements, tibia, peripherals

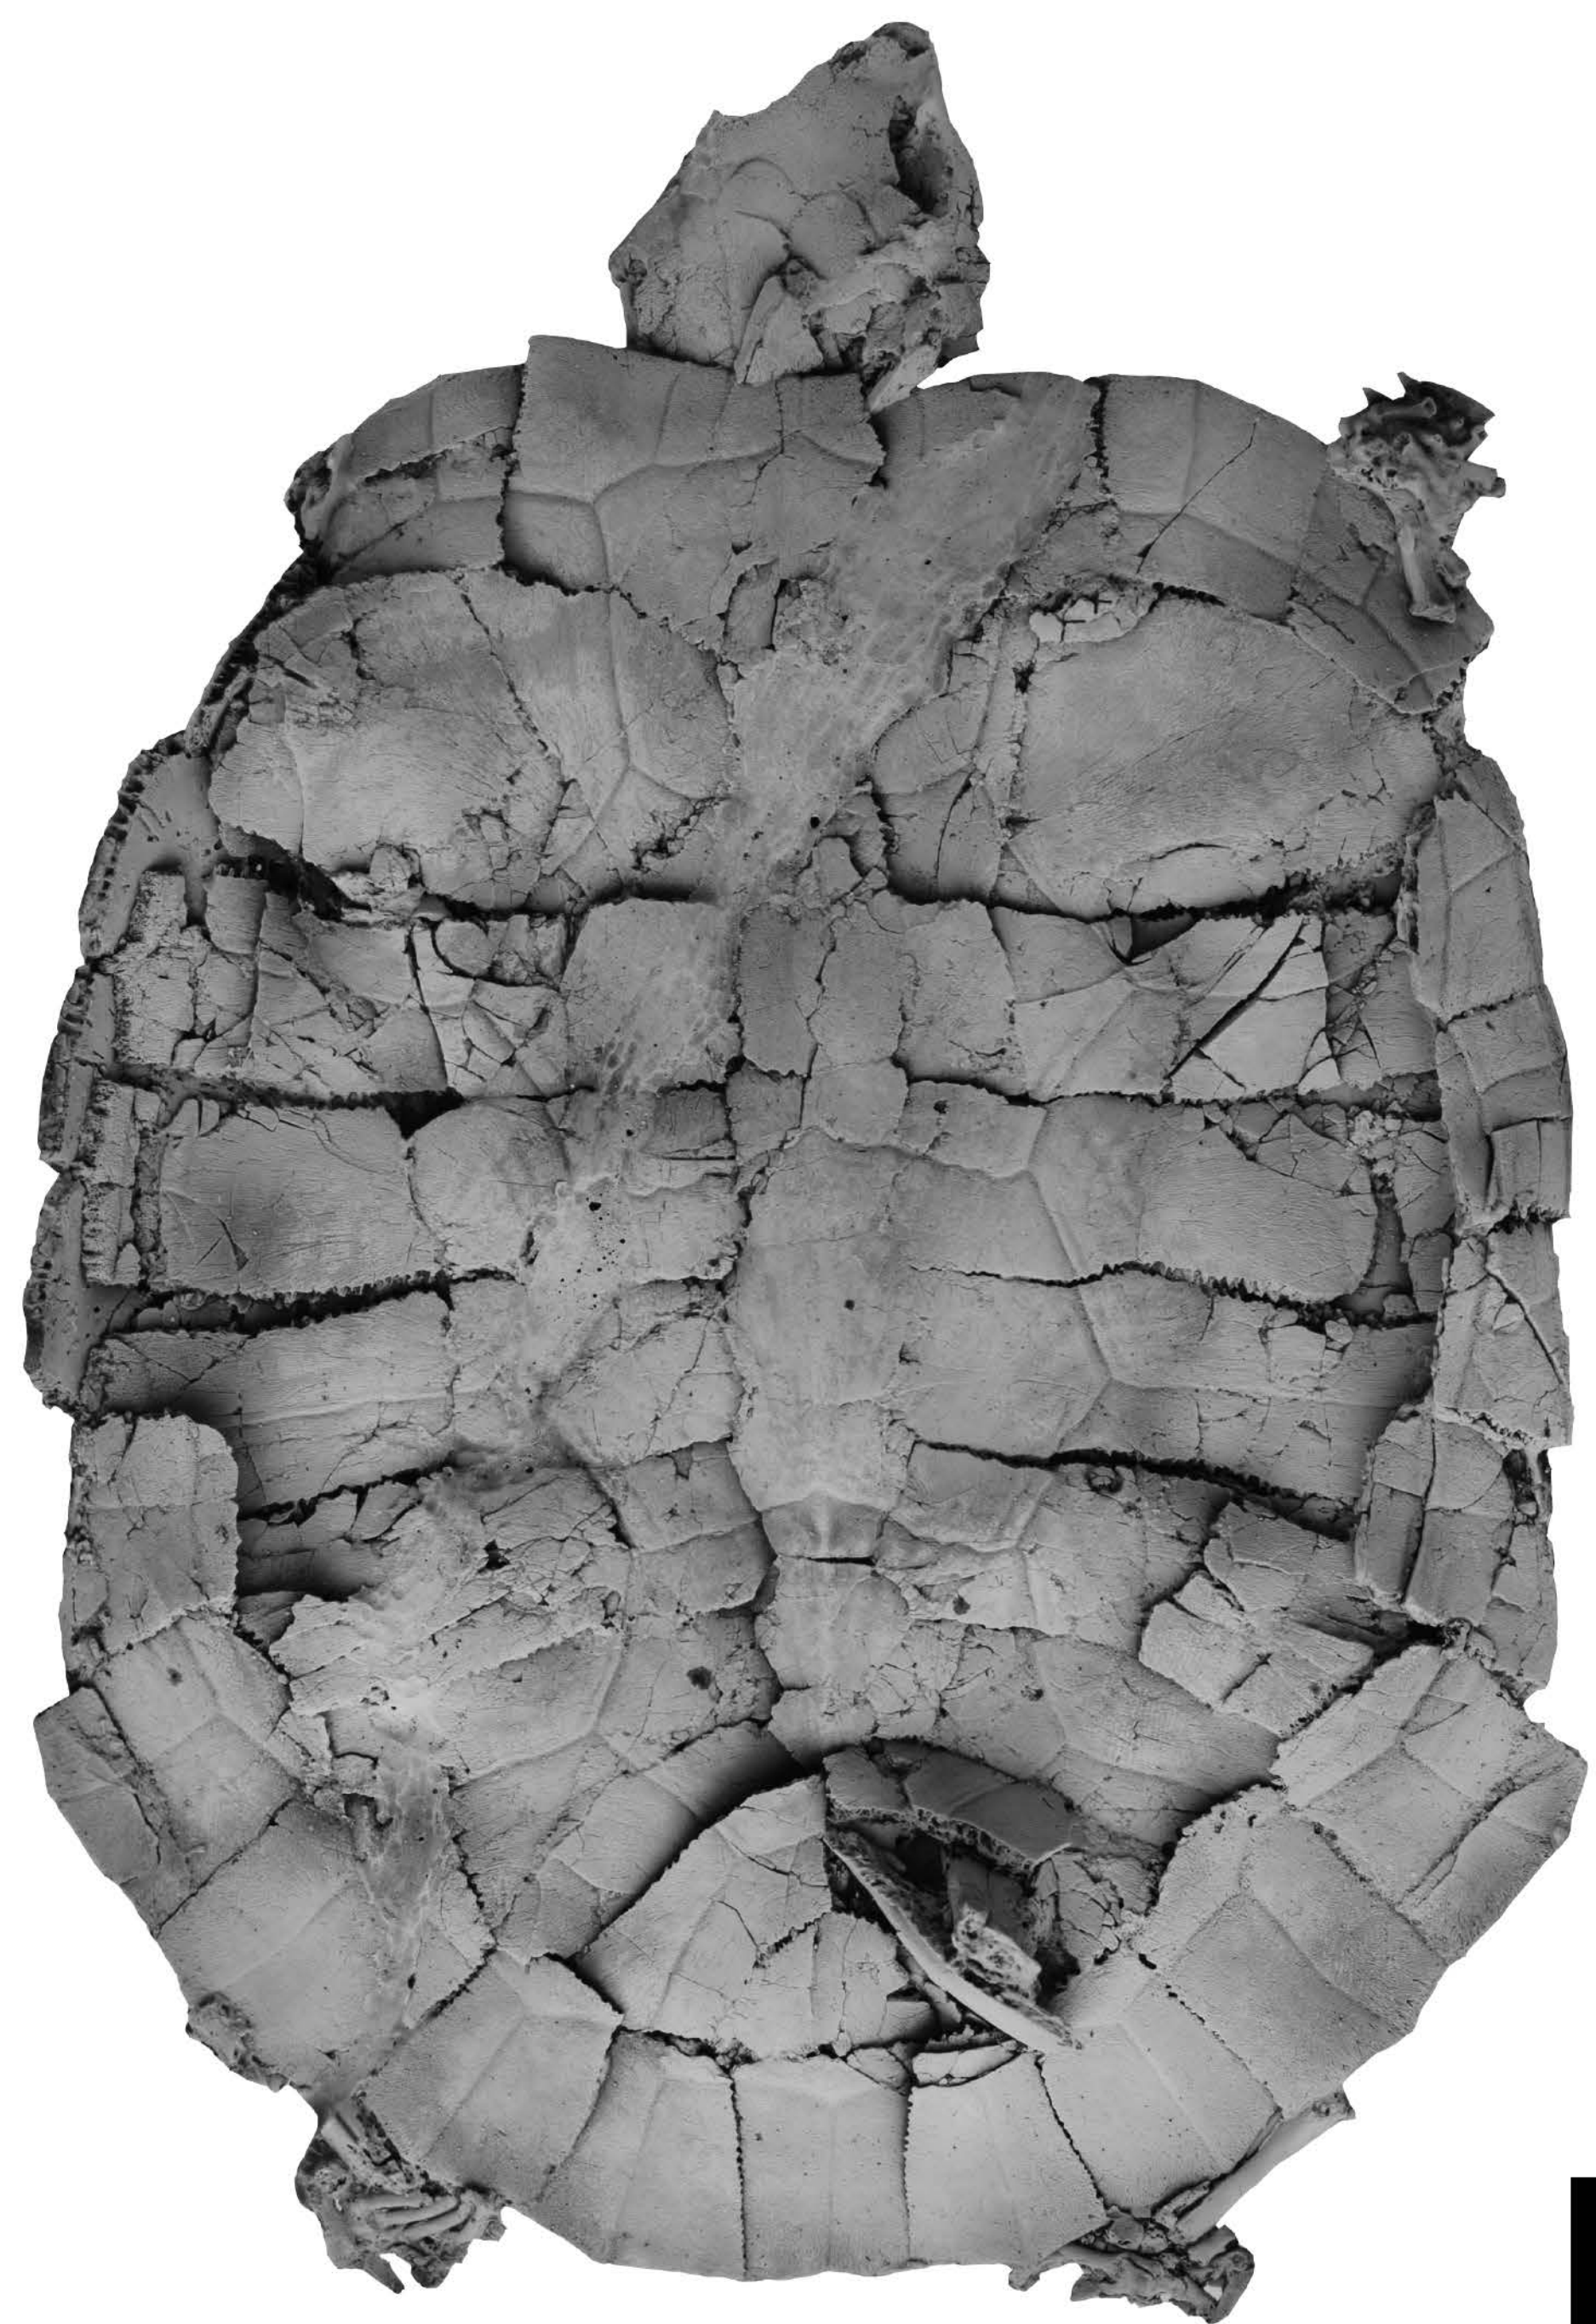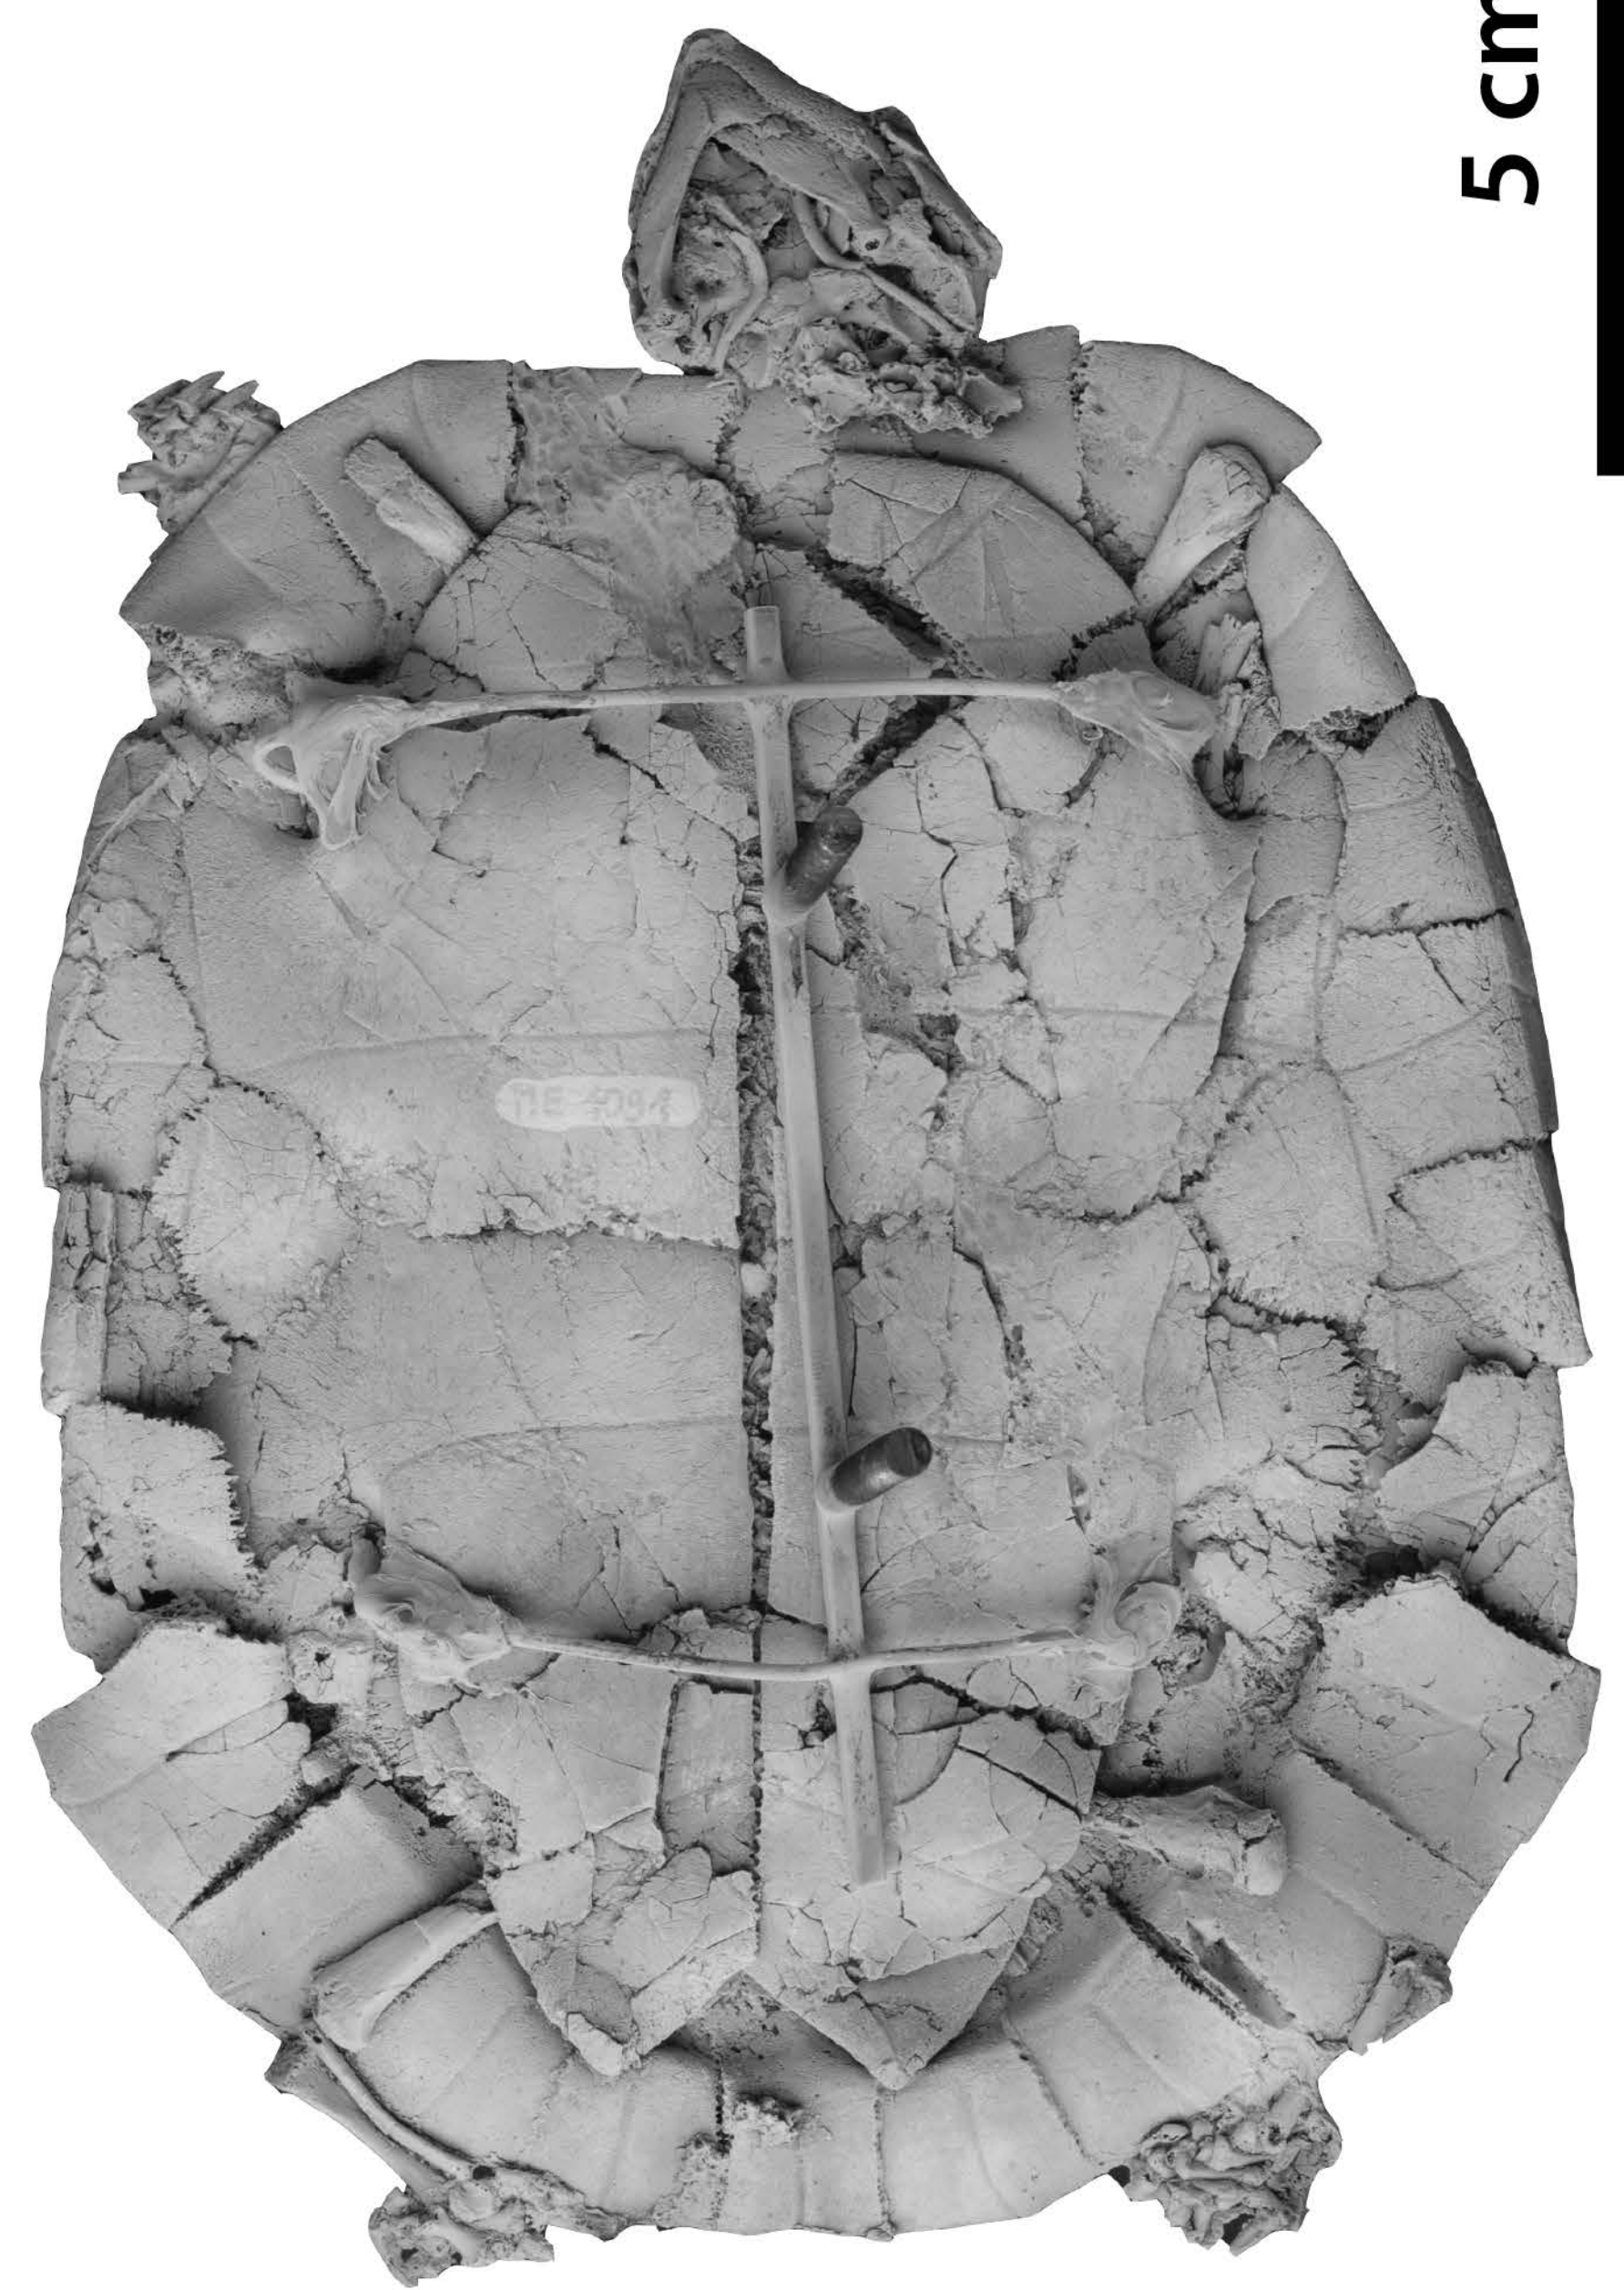

5 cm

**Plate 1. *Neochelys franzeni* SMF ME 1091 (Holotype)**



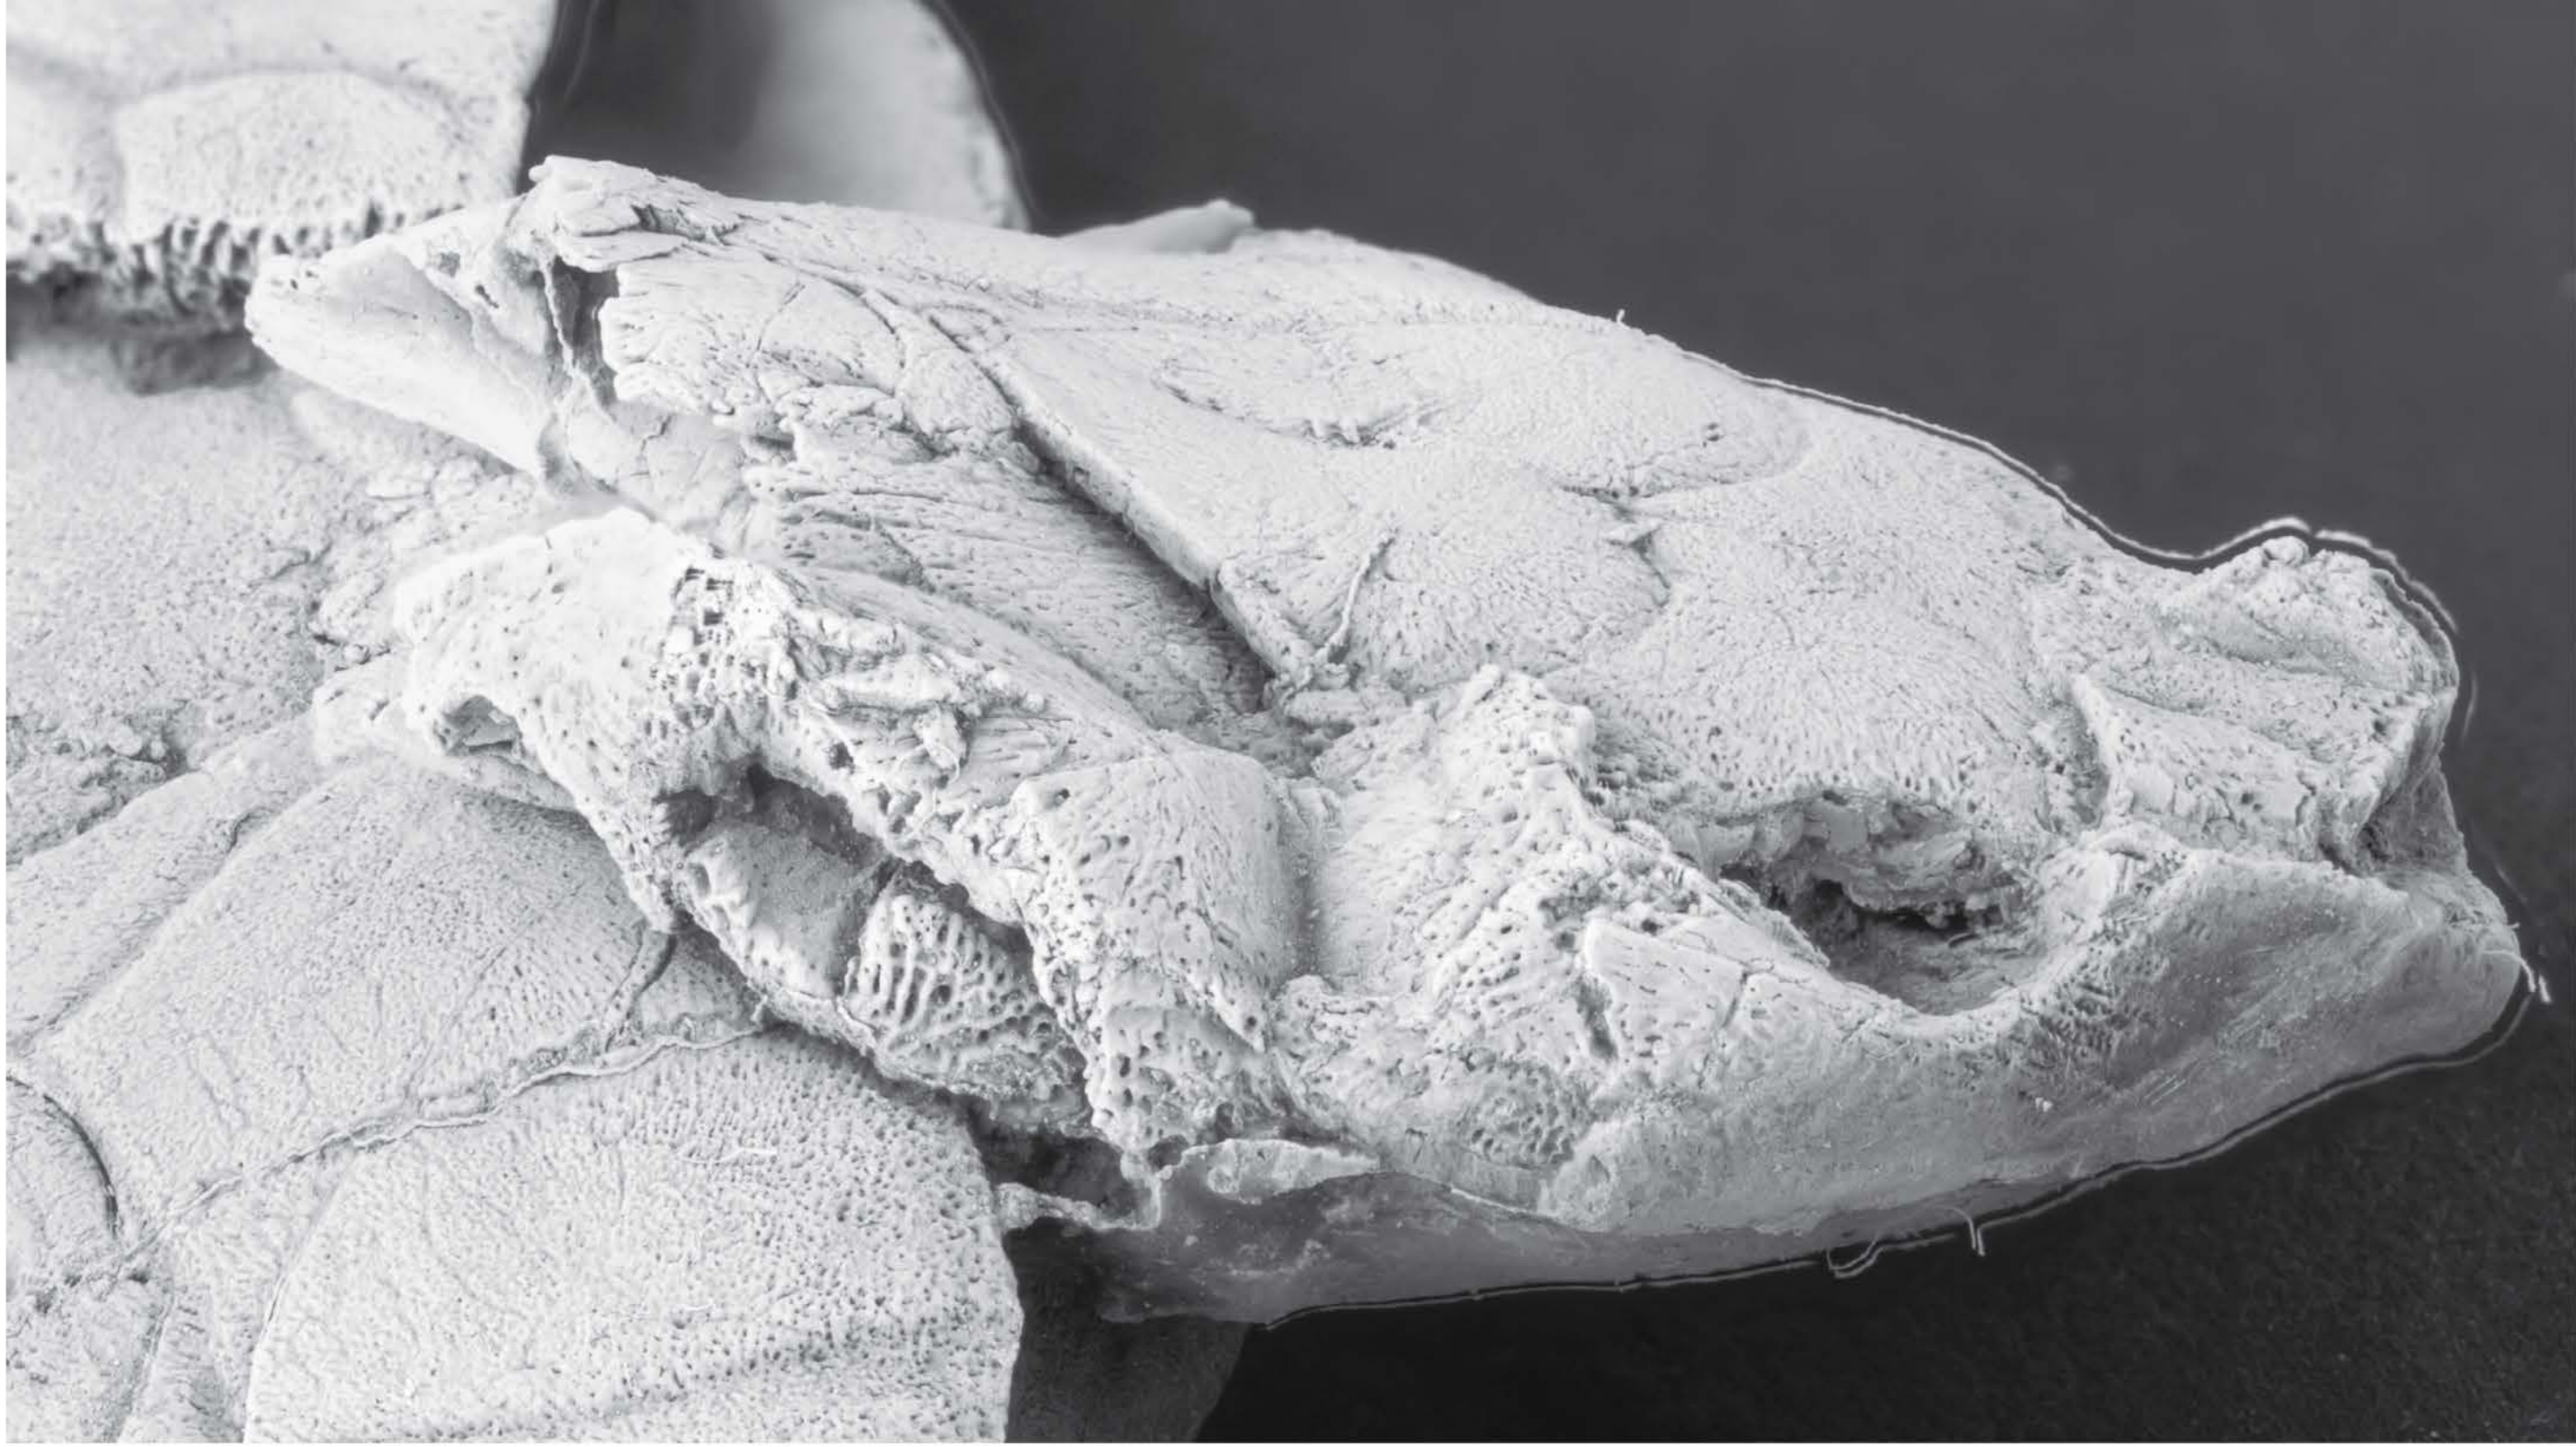

Skull lateral (right) view

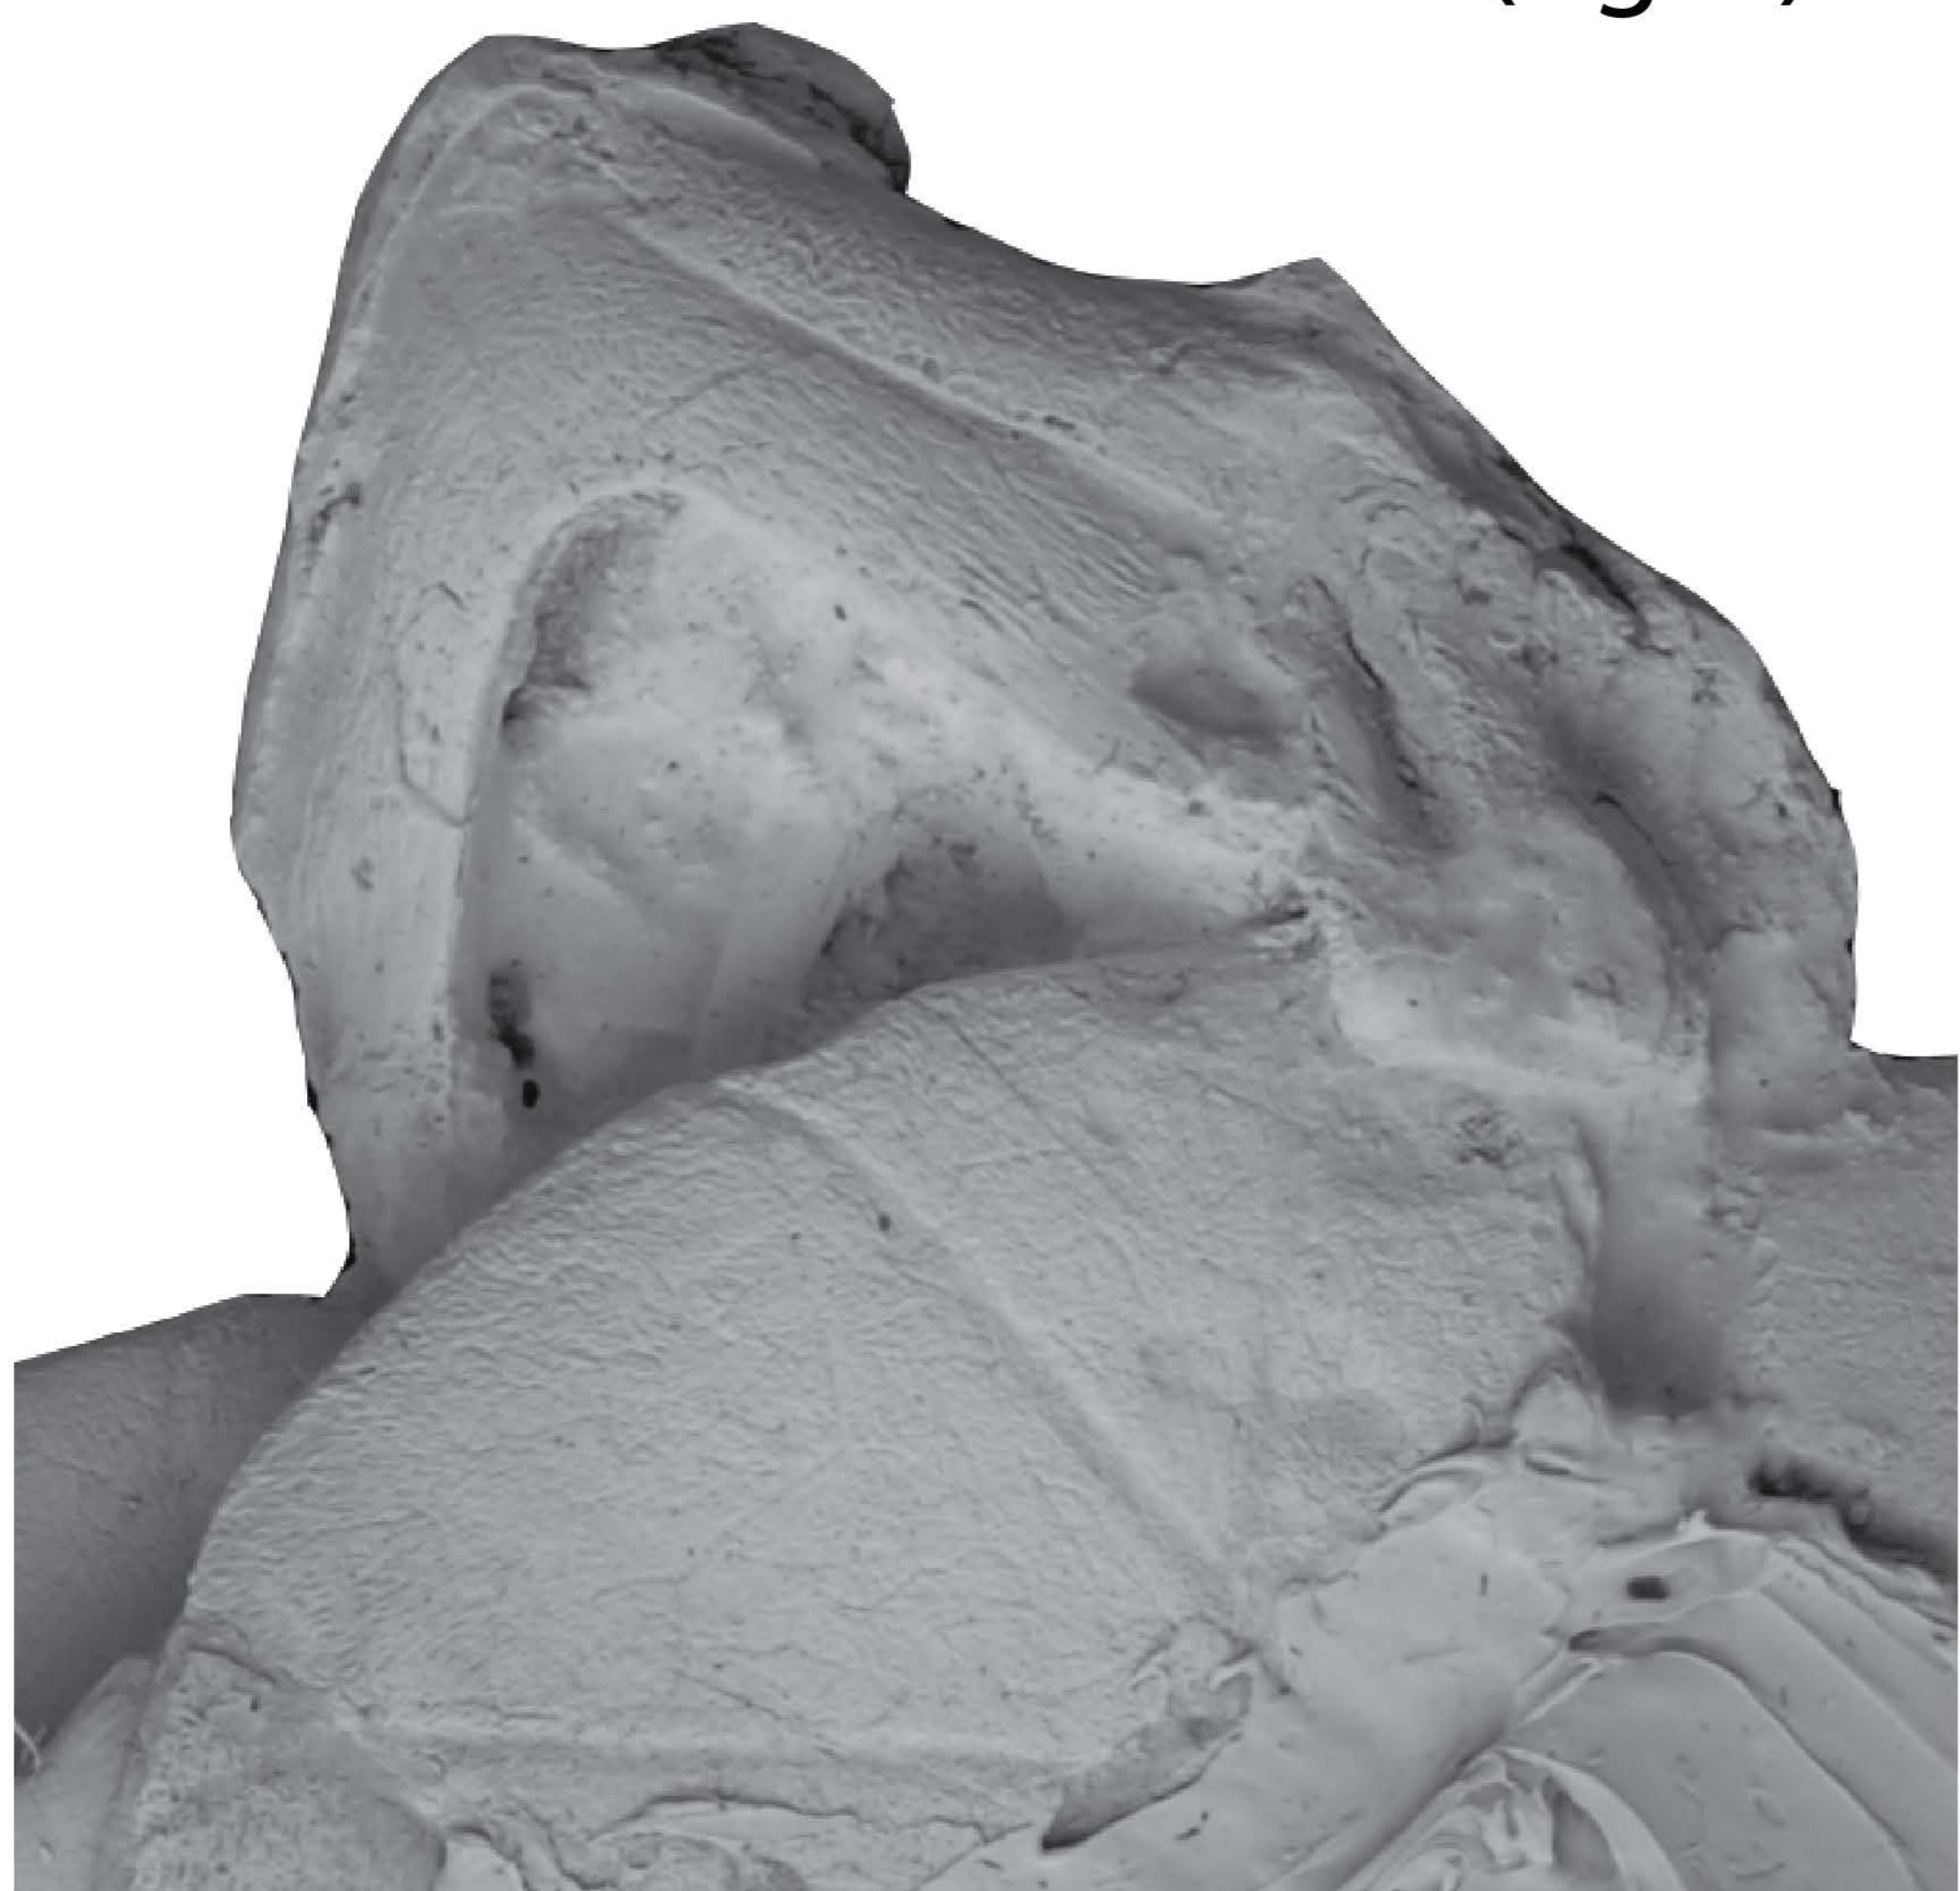

Skull ventral view

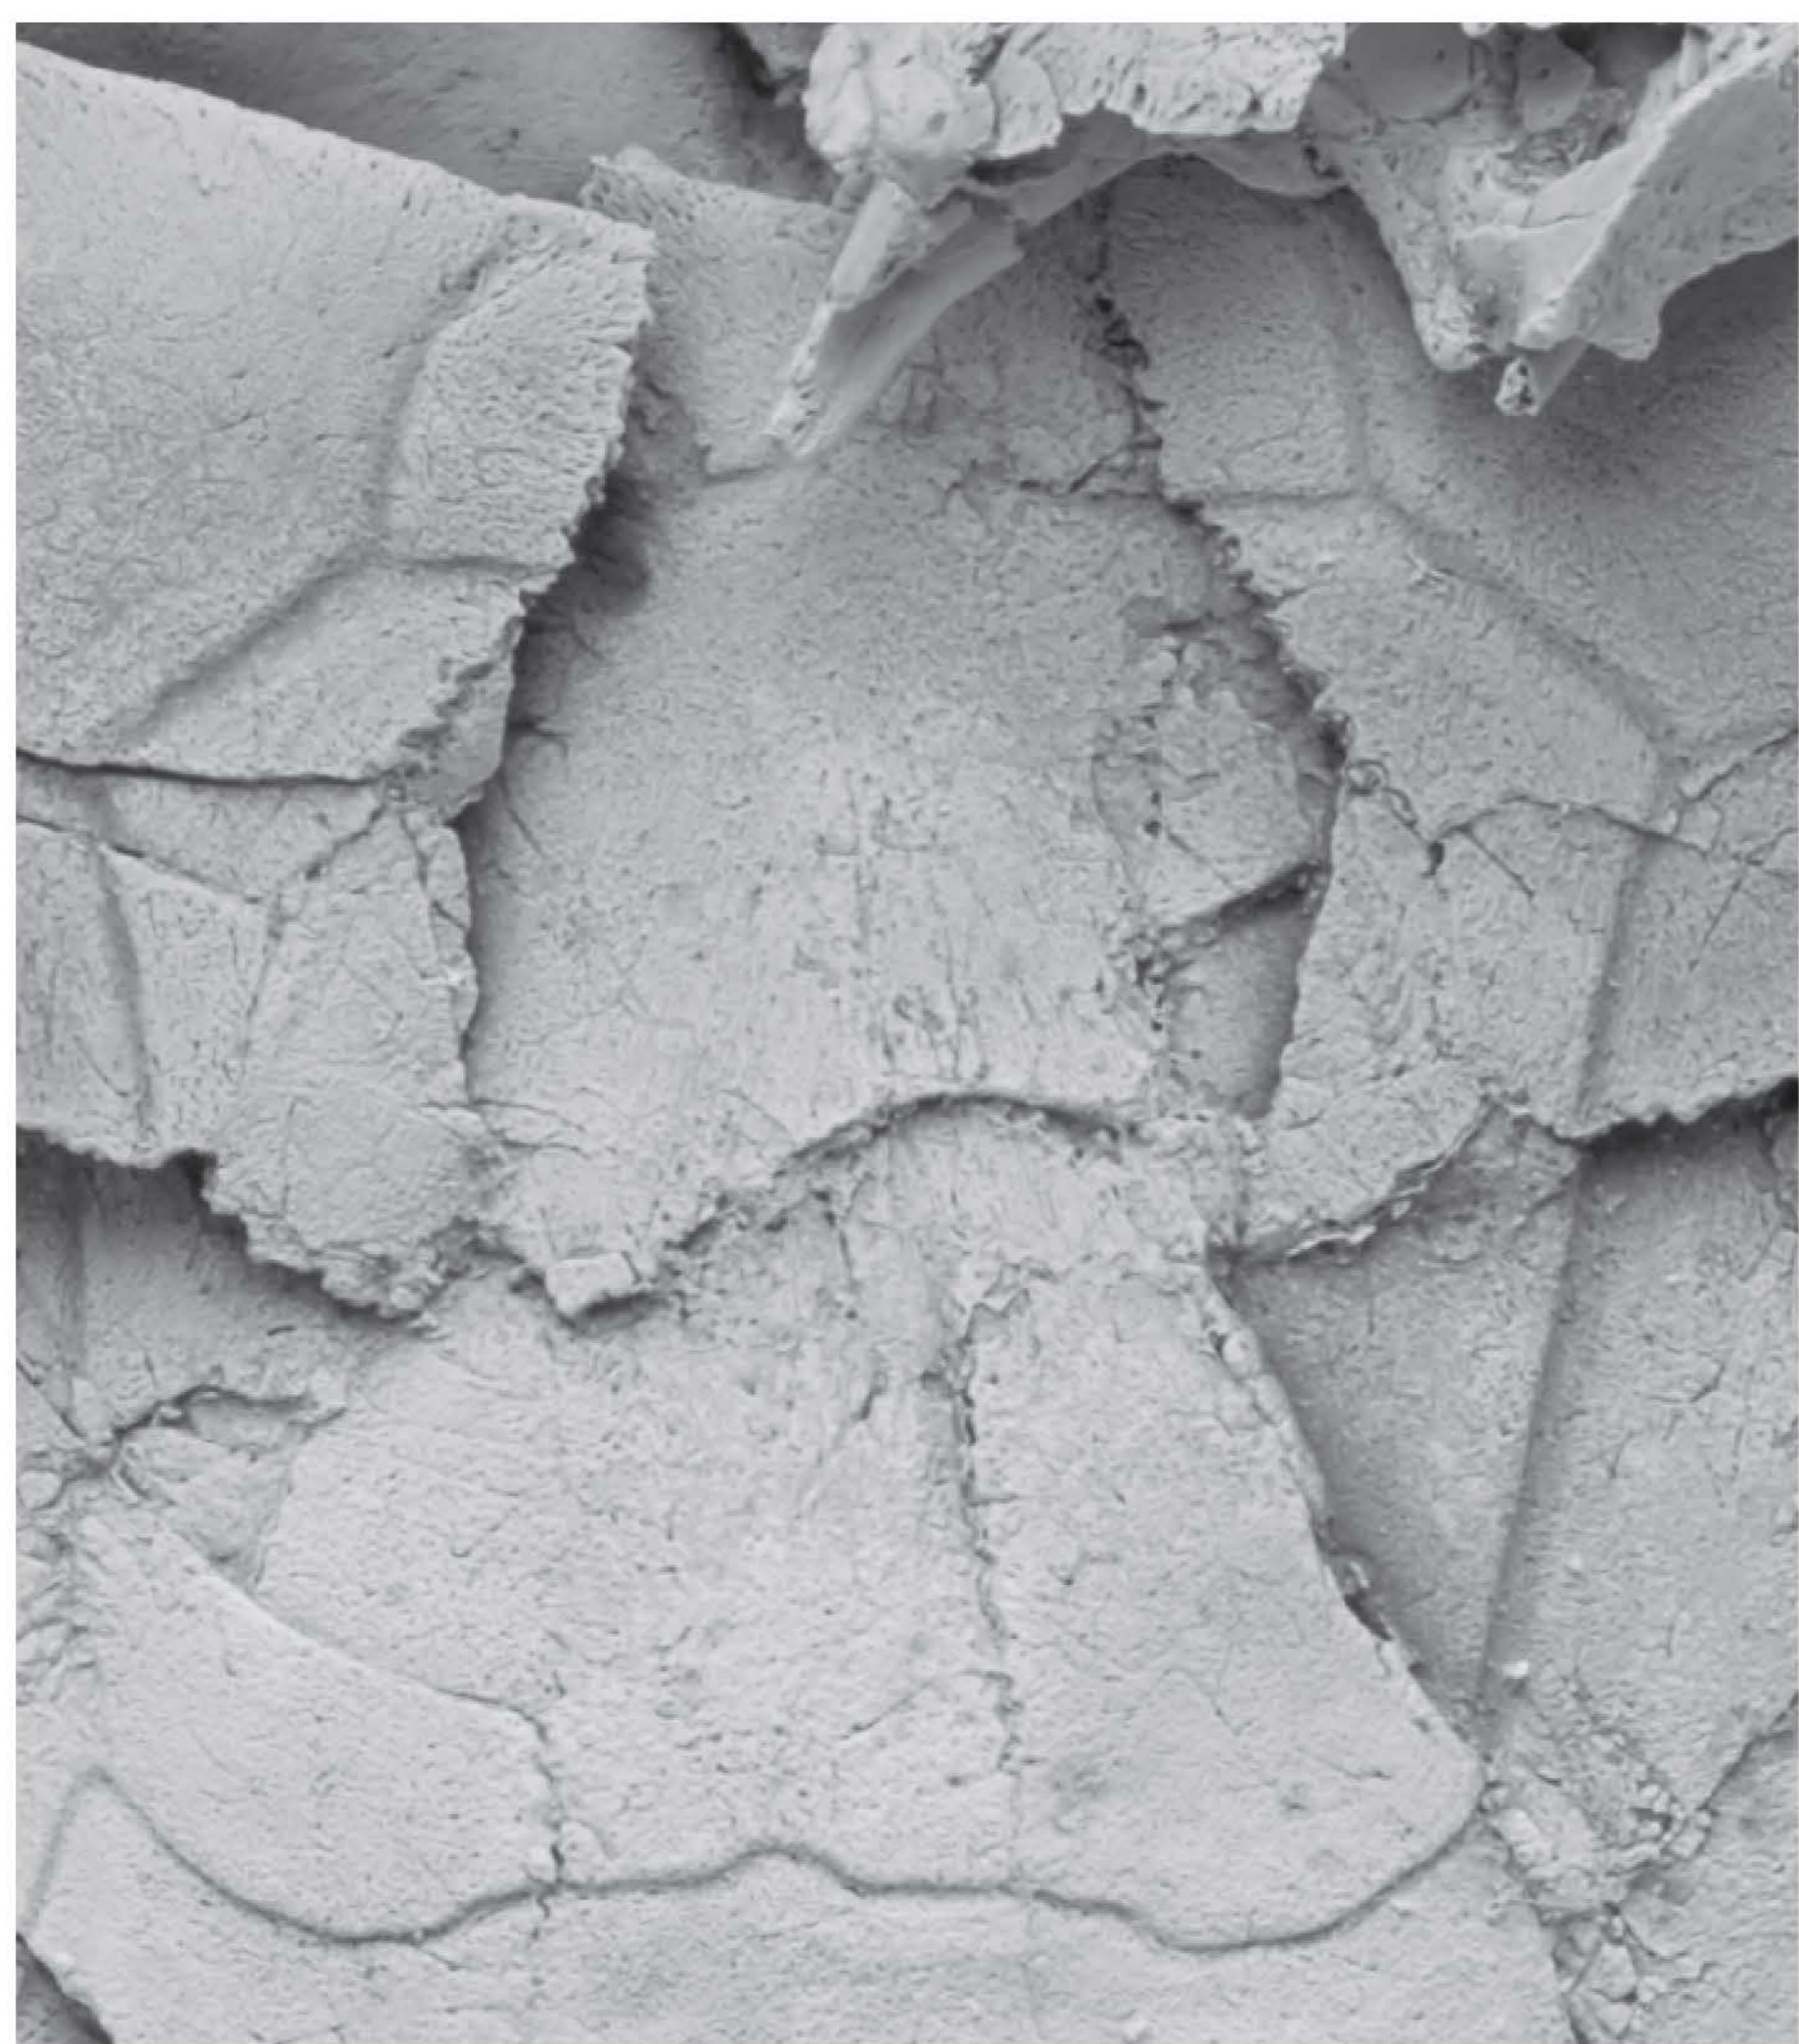

Nuchal/vertebral scute 1

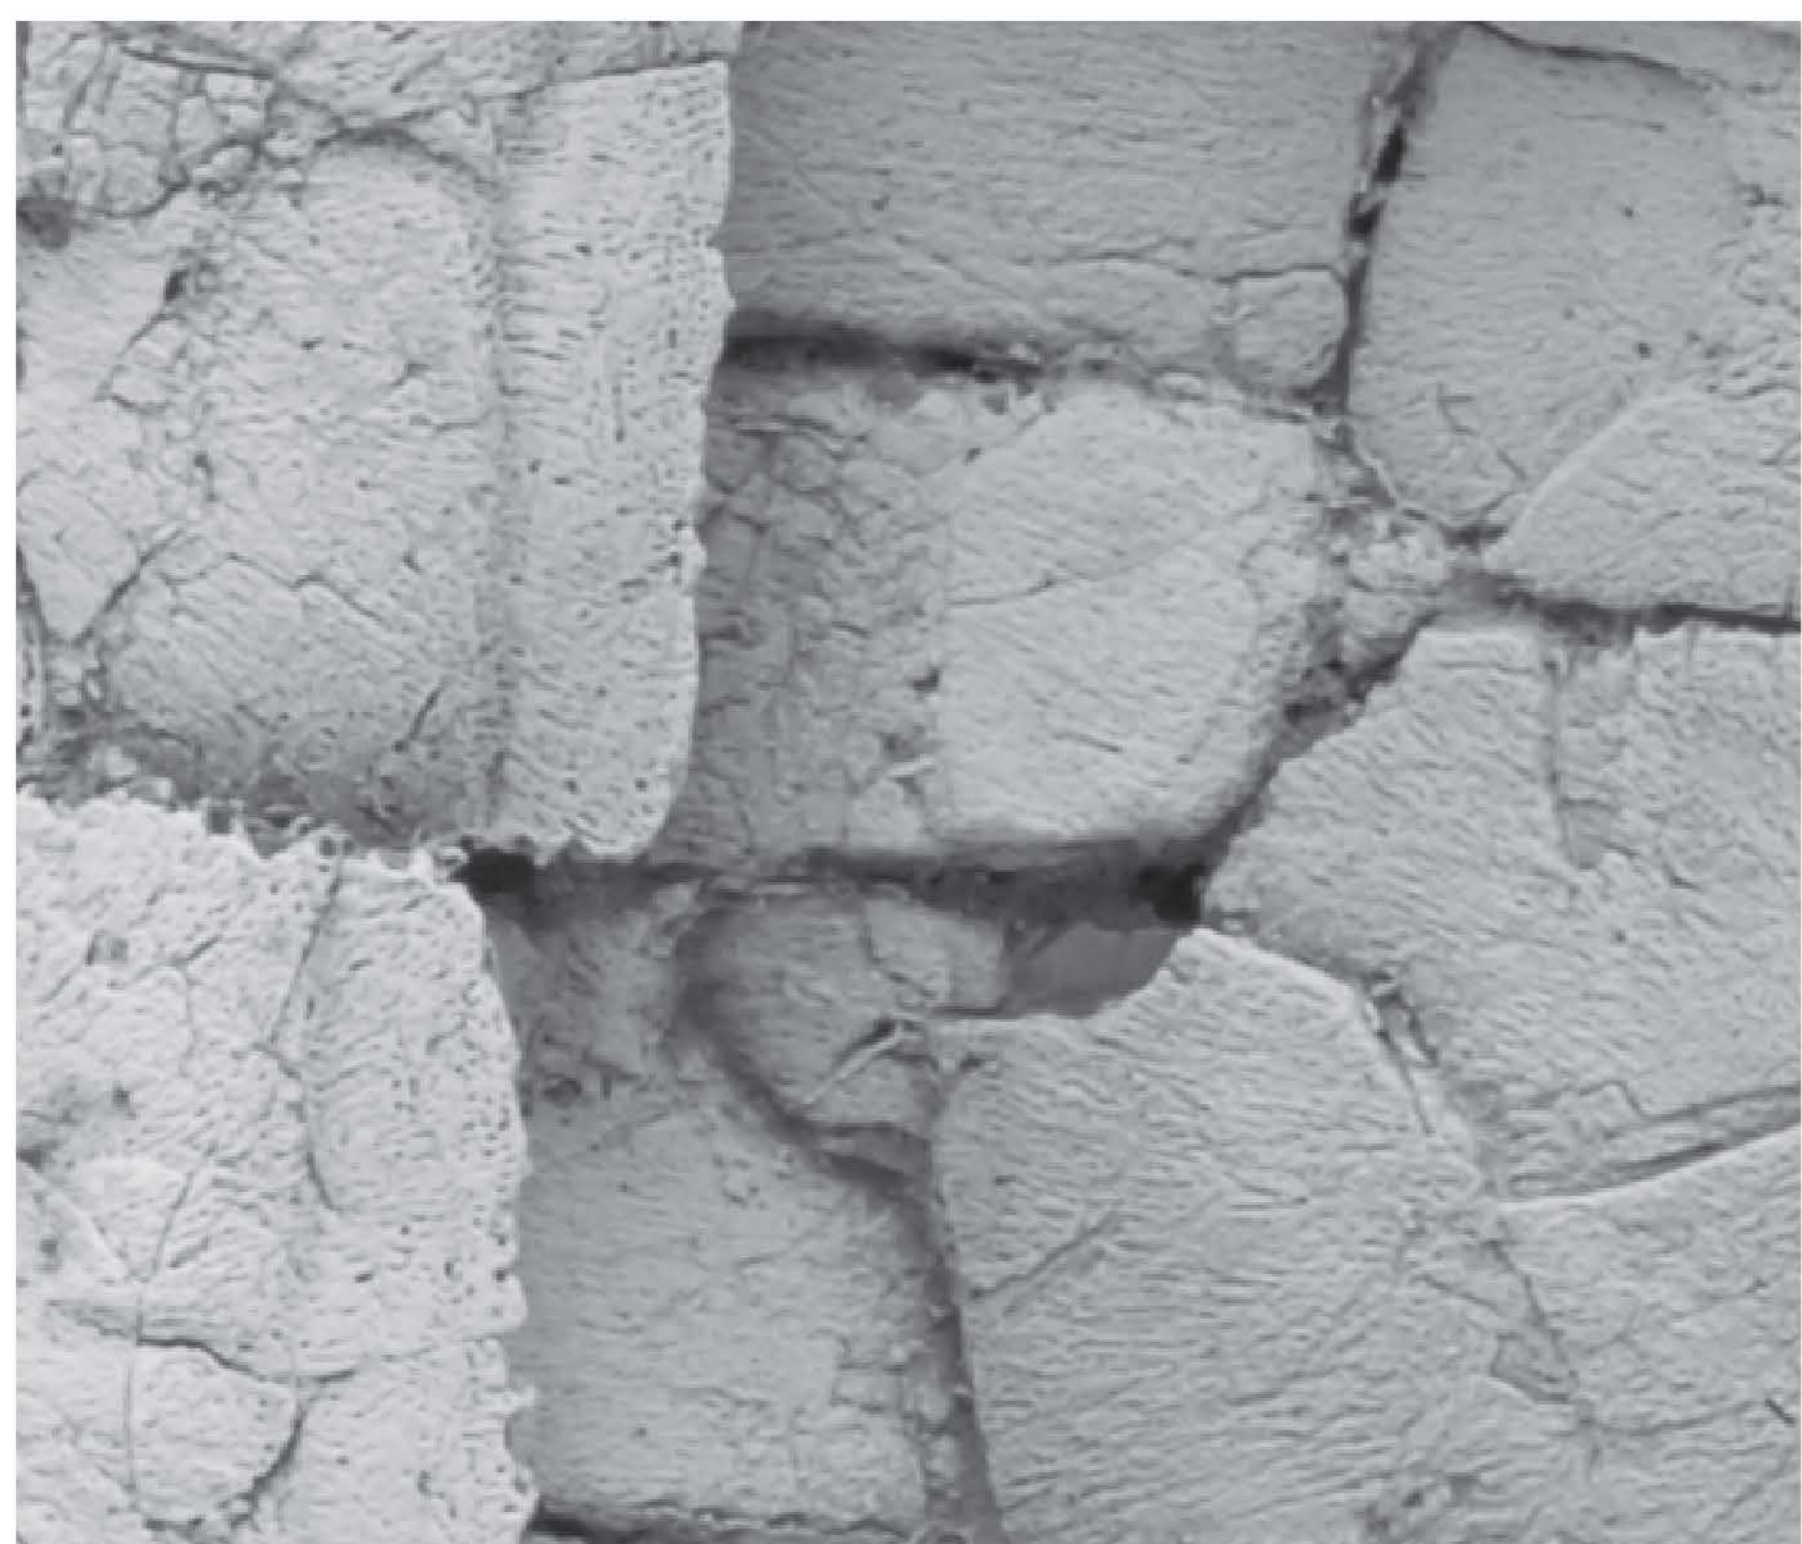

Peripheral/costals dorsal sculpture

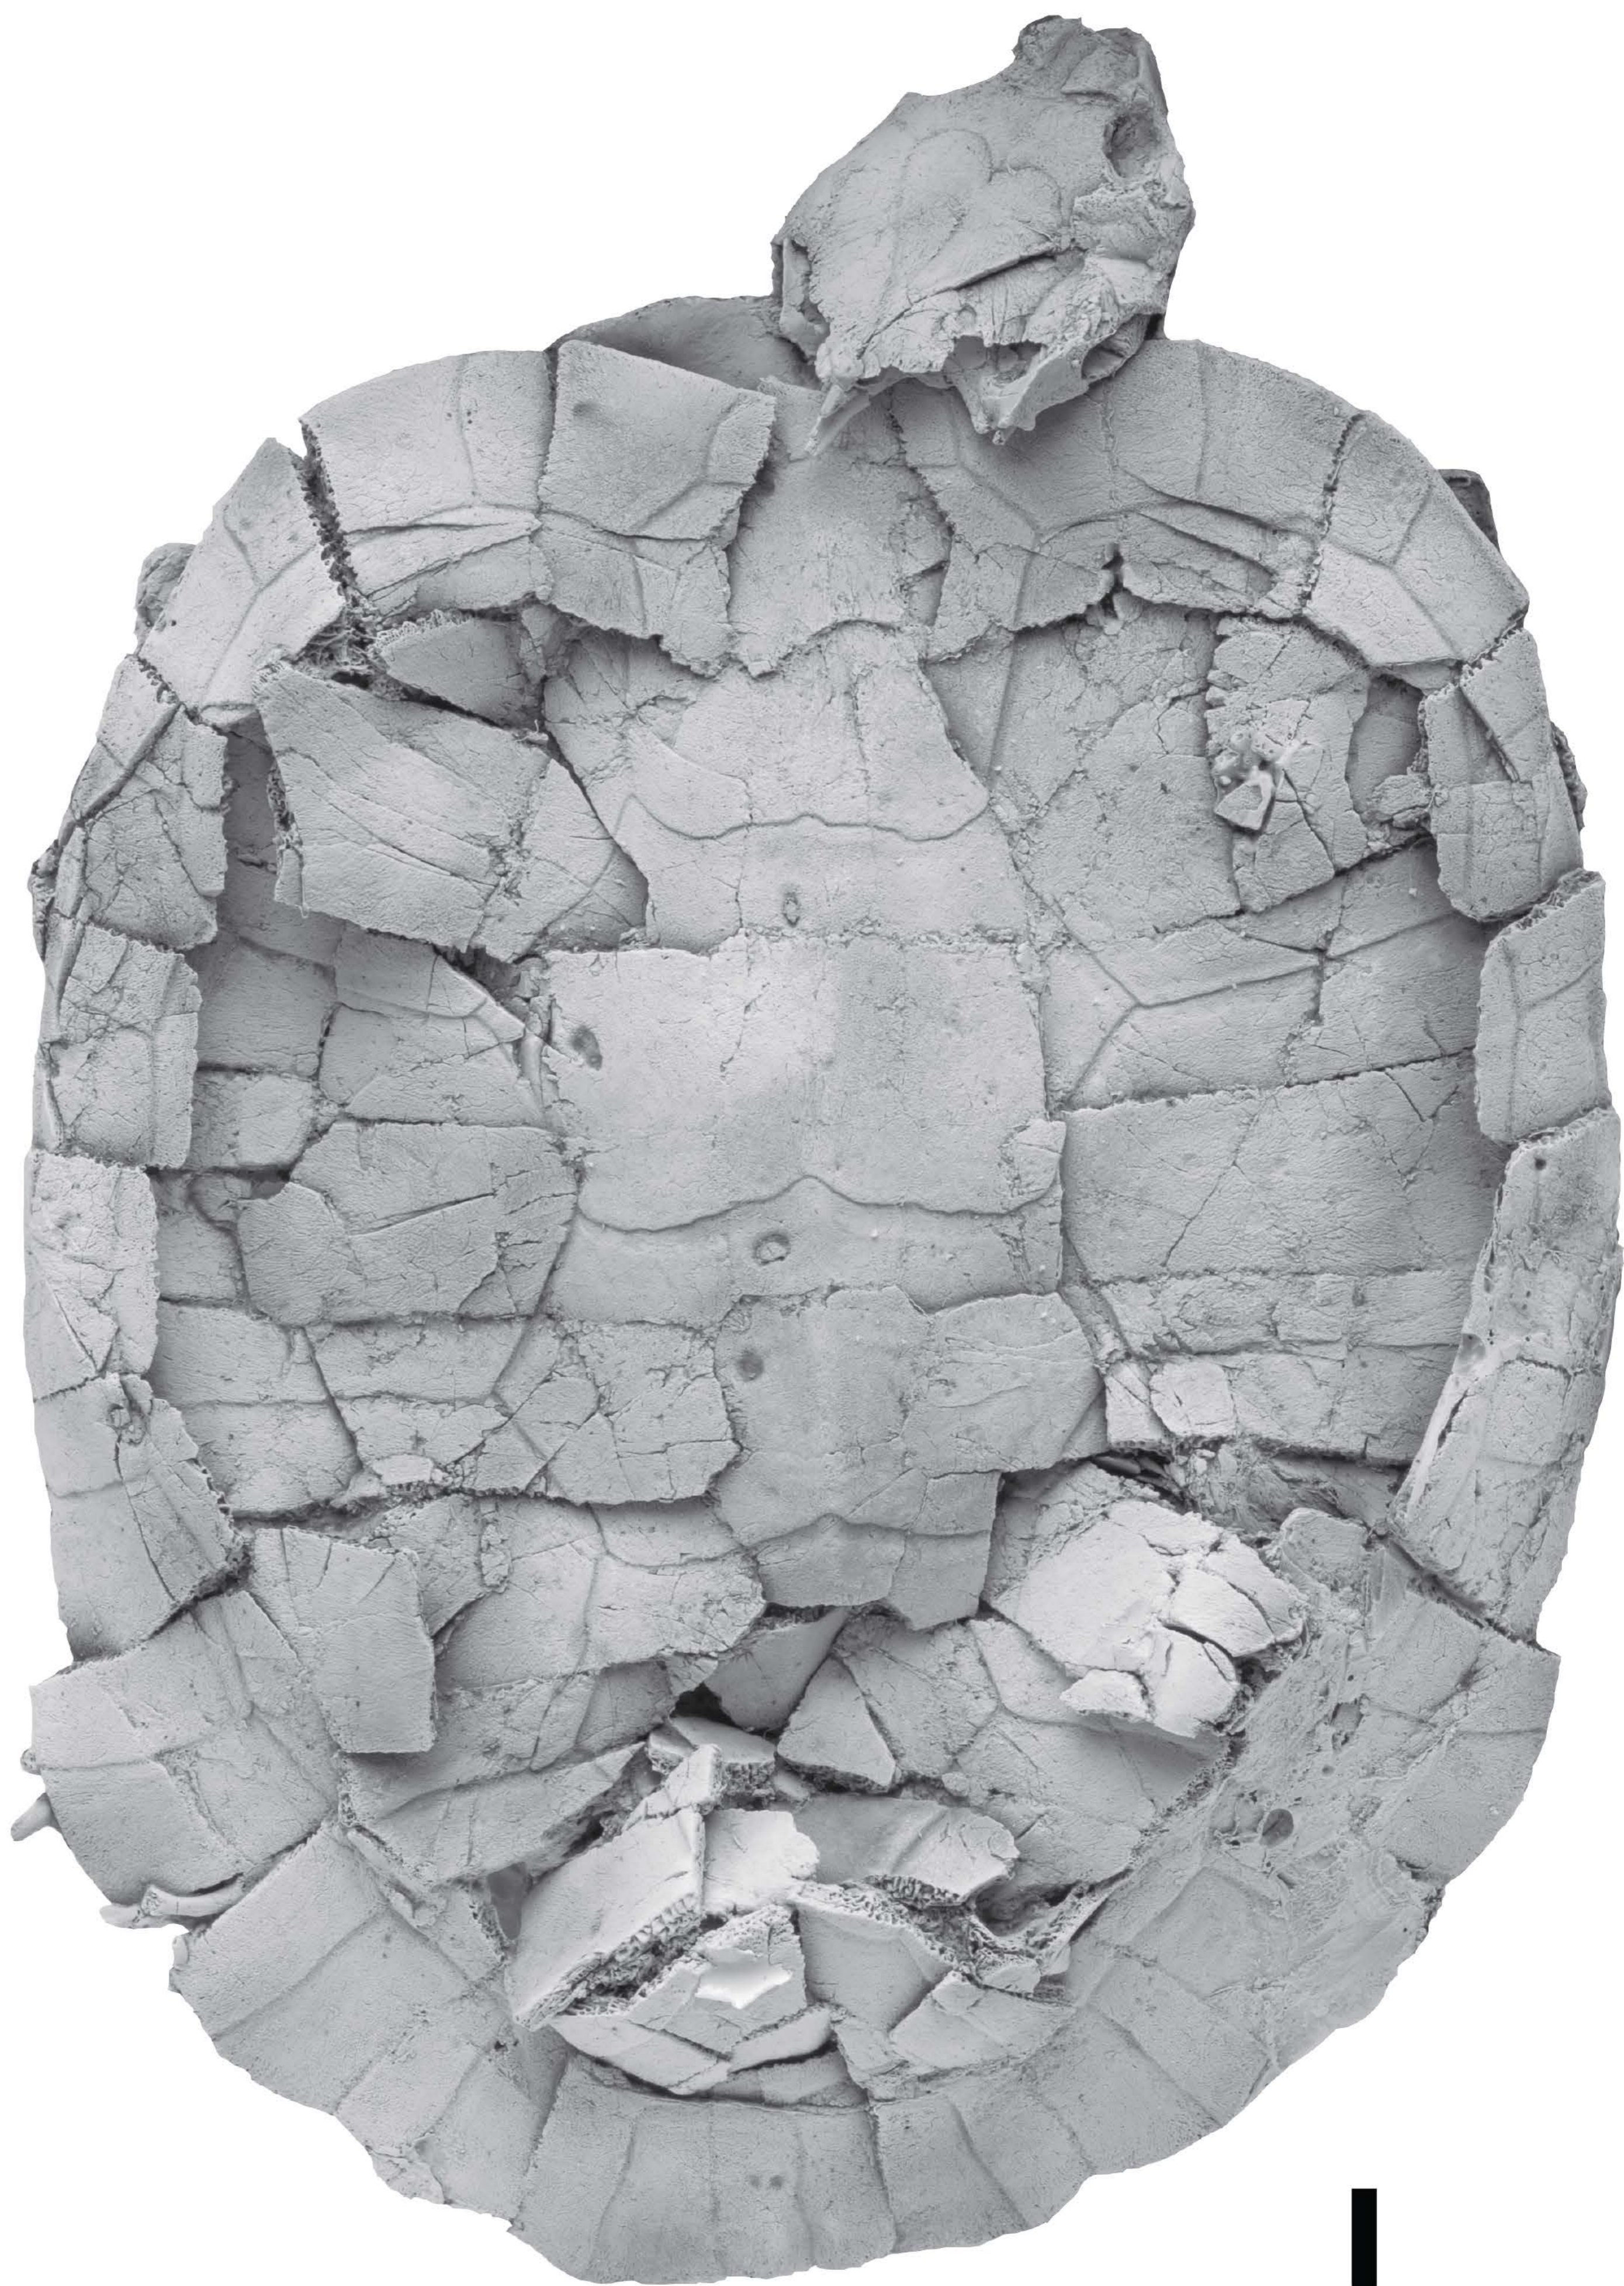

5 cm

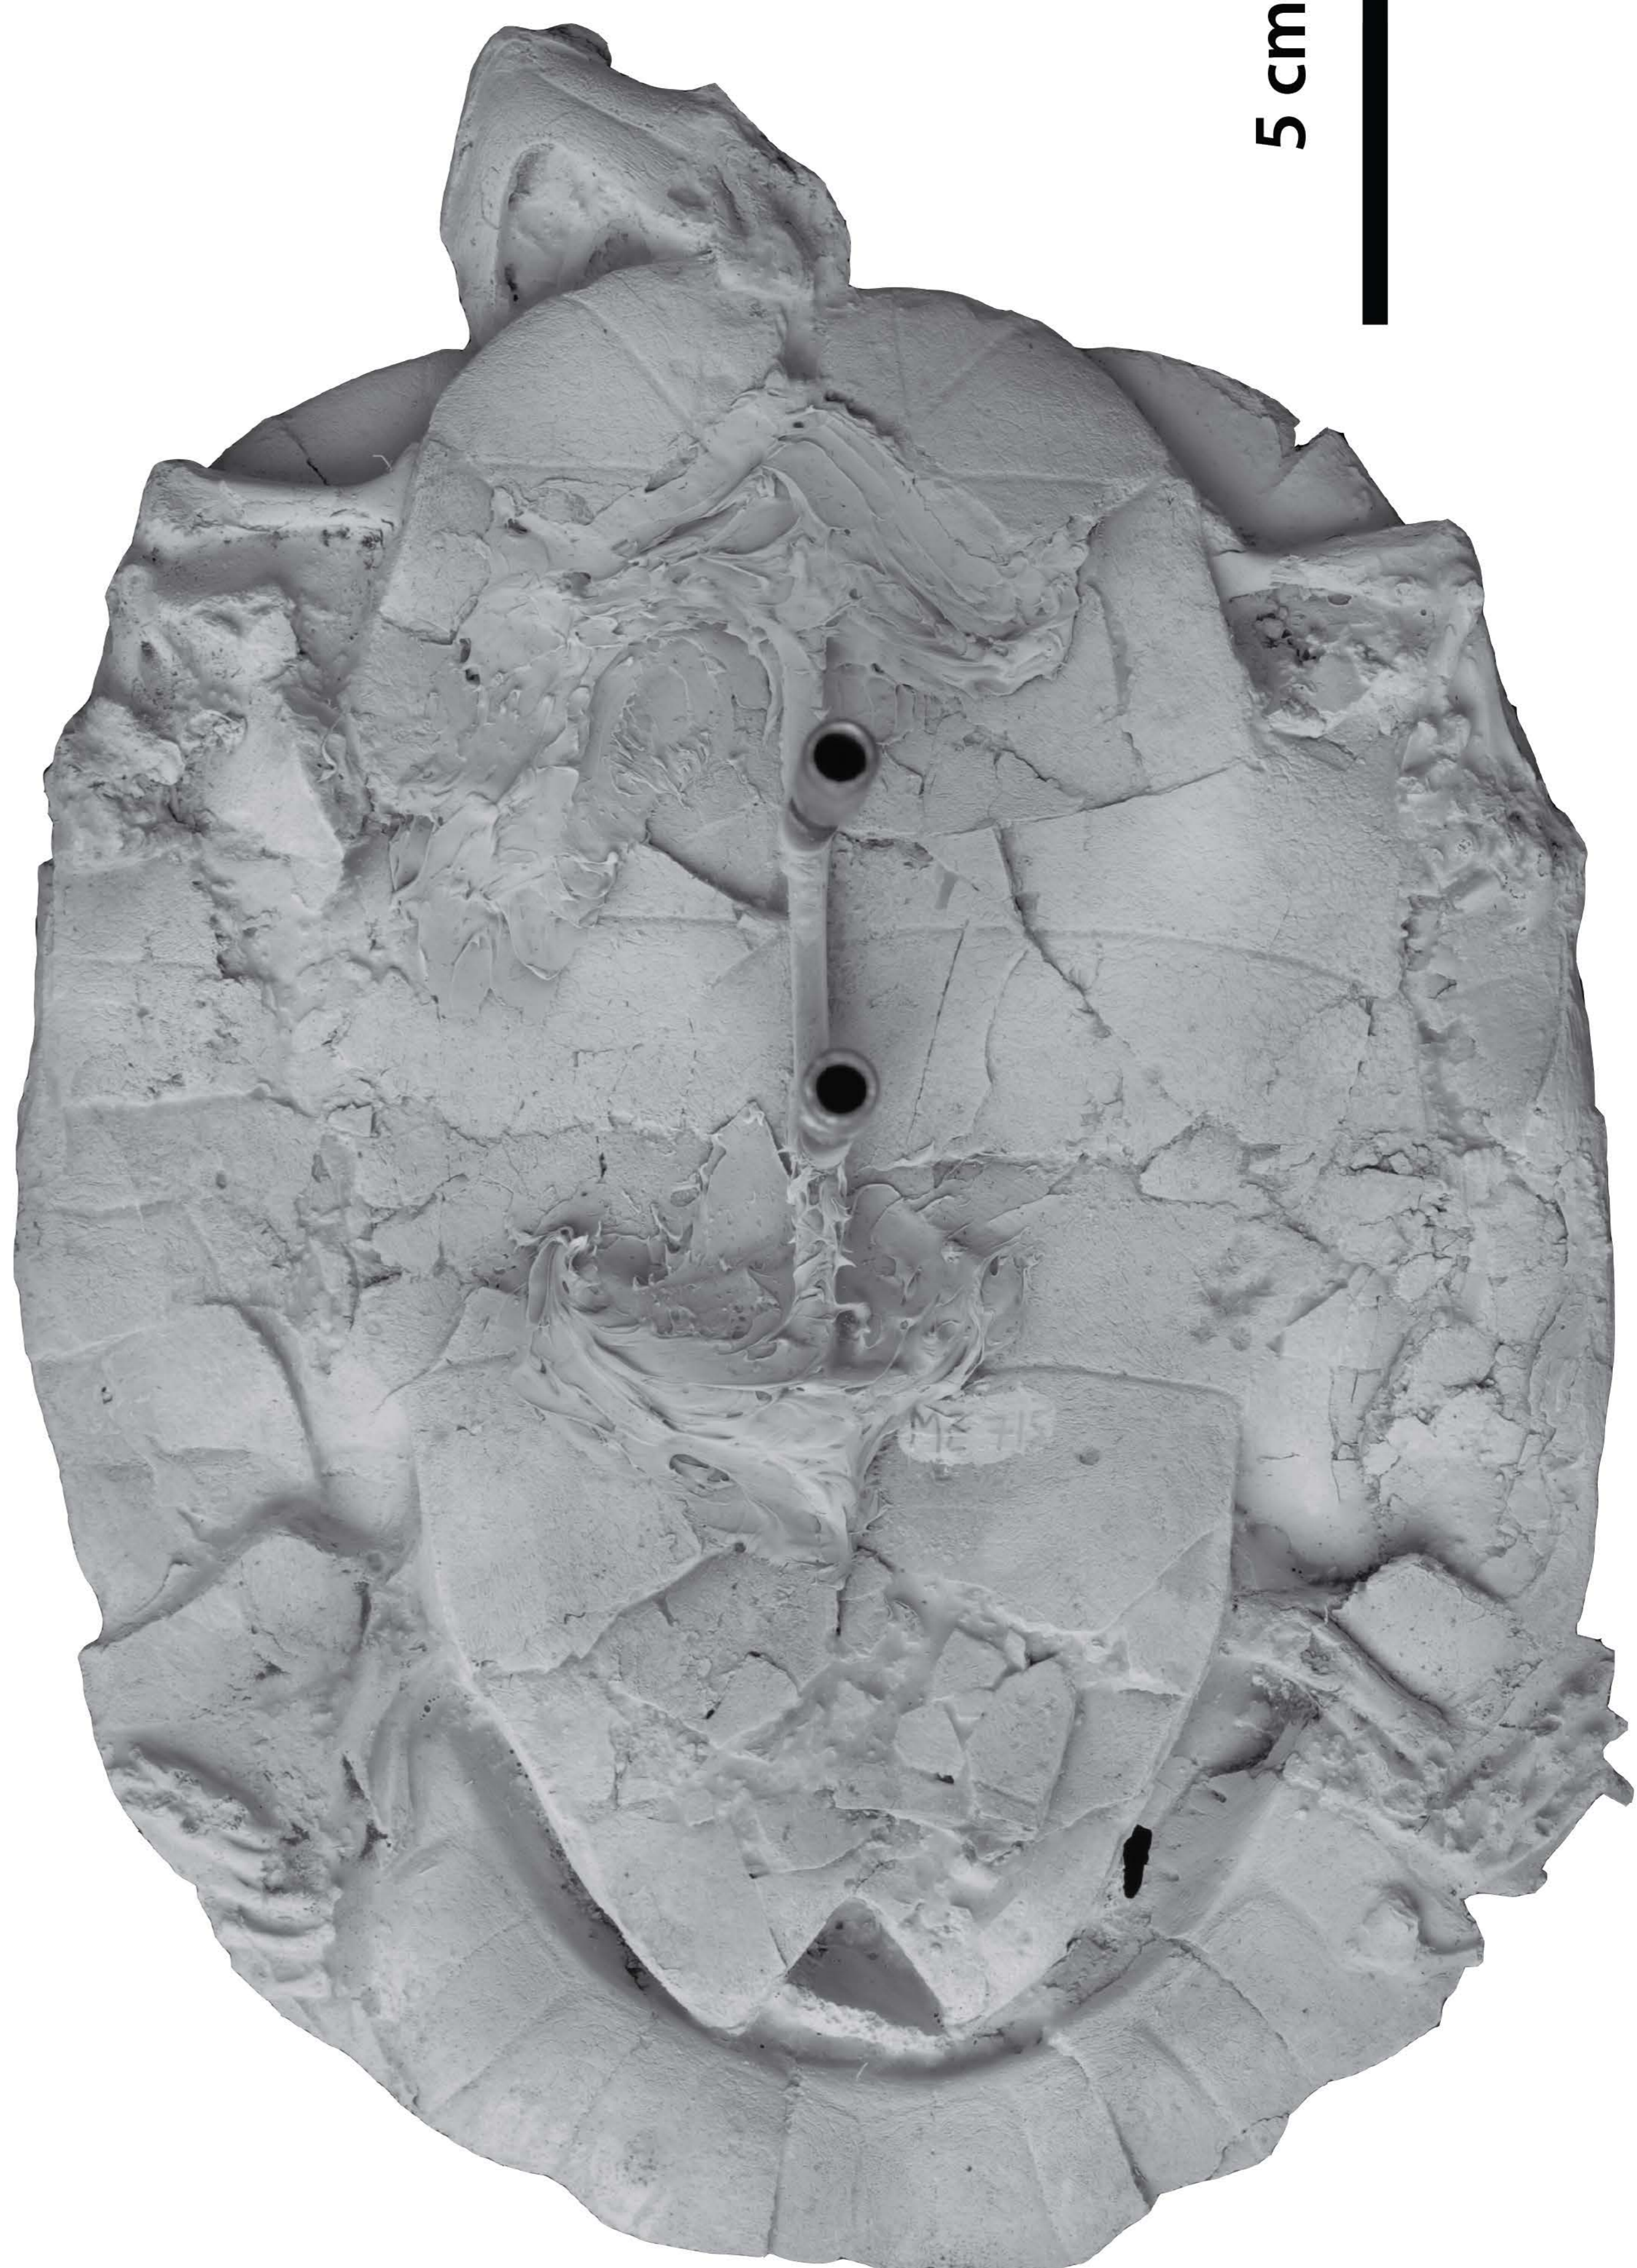



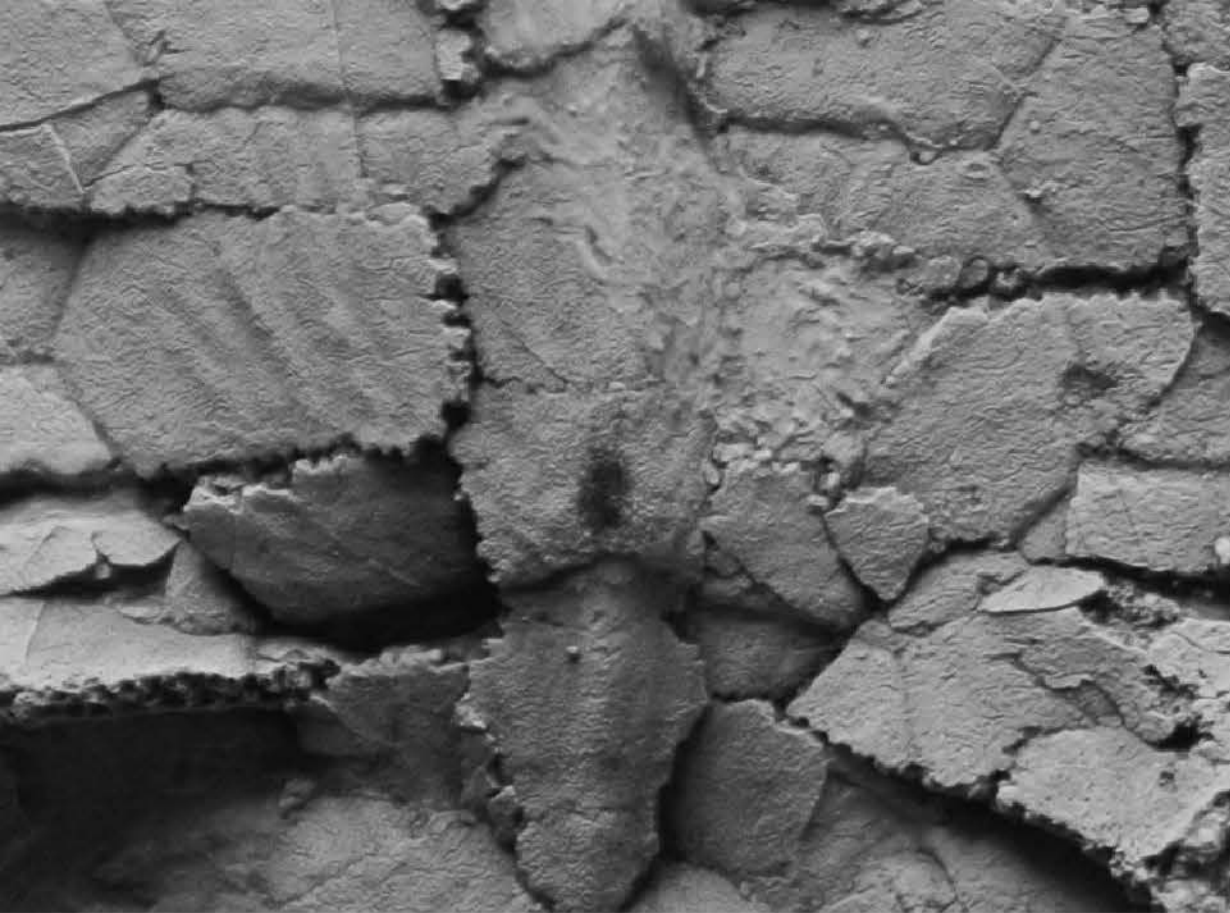

Vertebral 3, radial striations

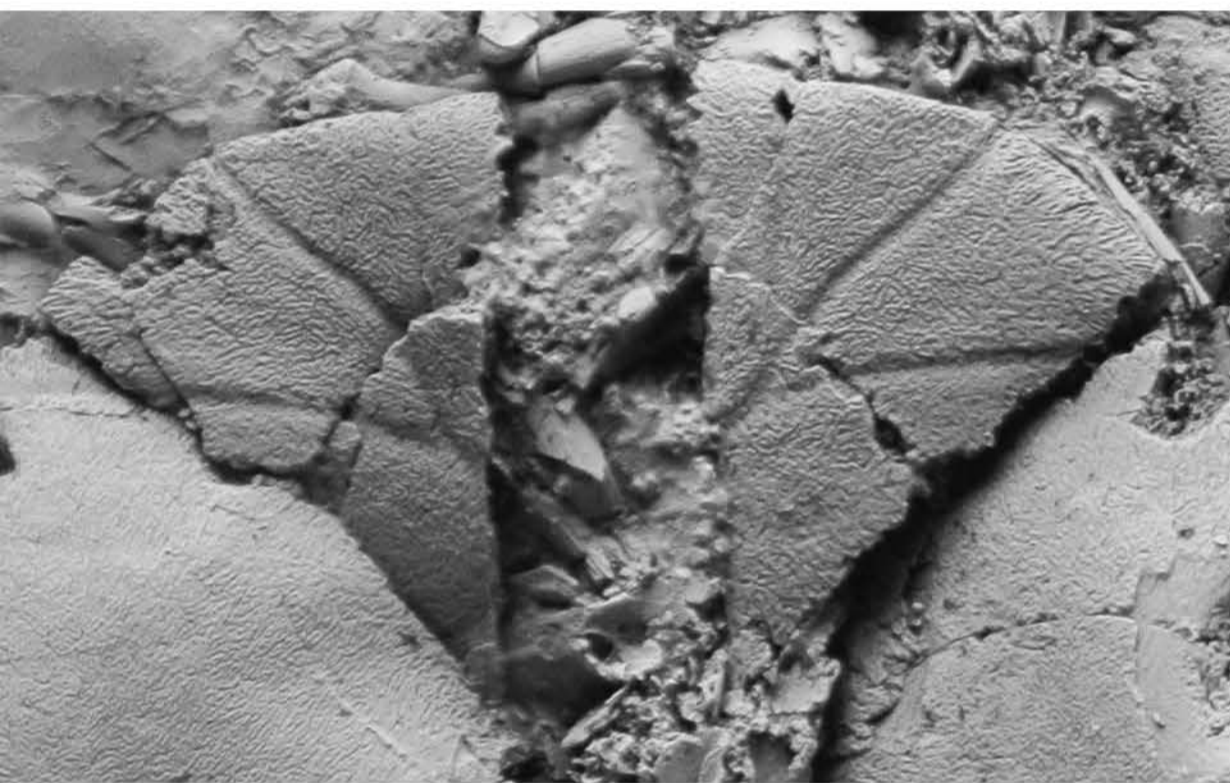

Epiplastra

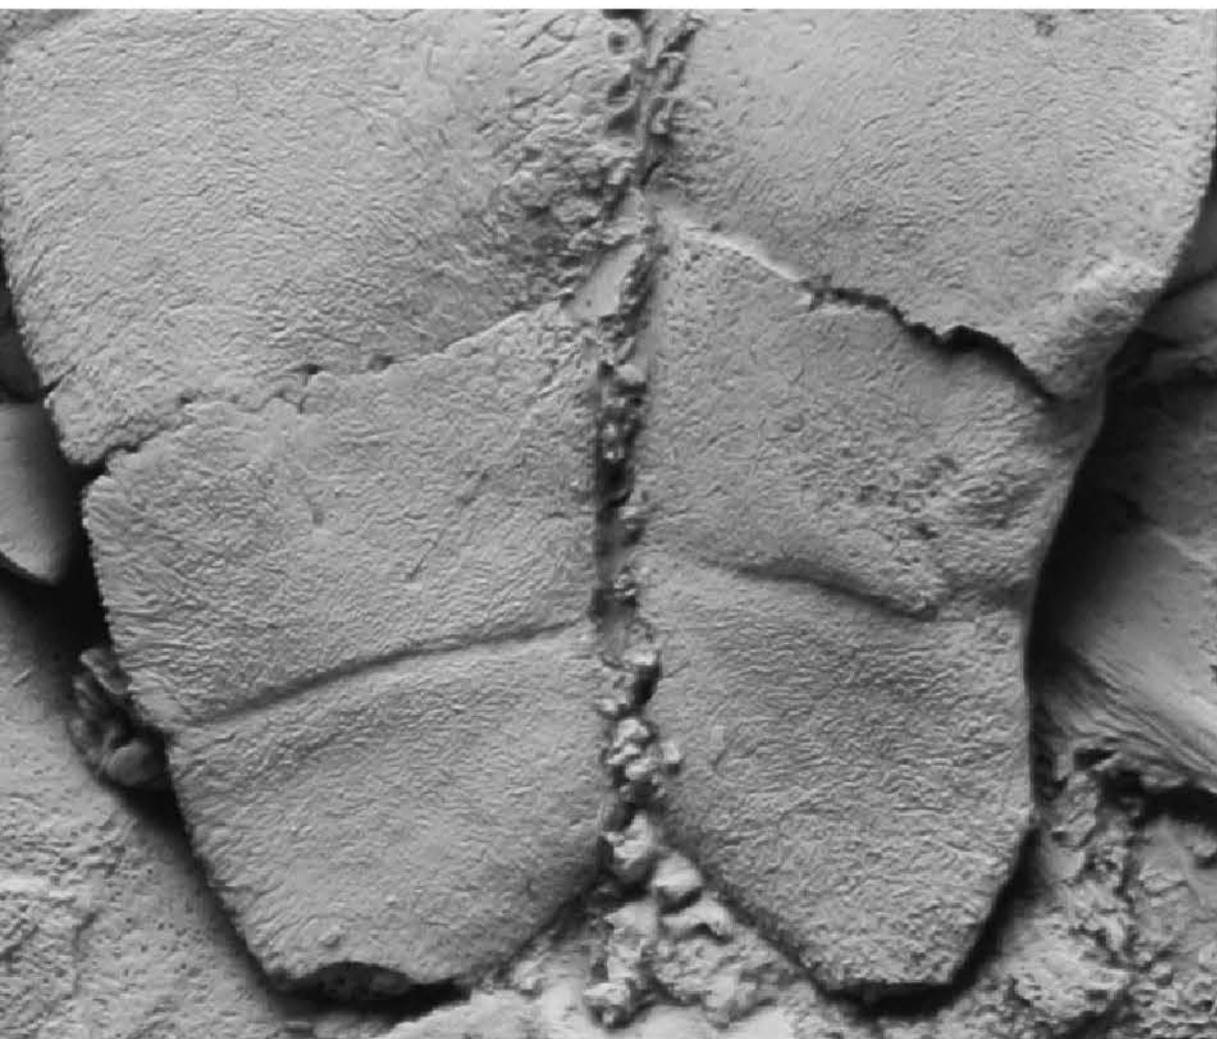

Xiphiplastra

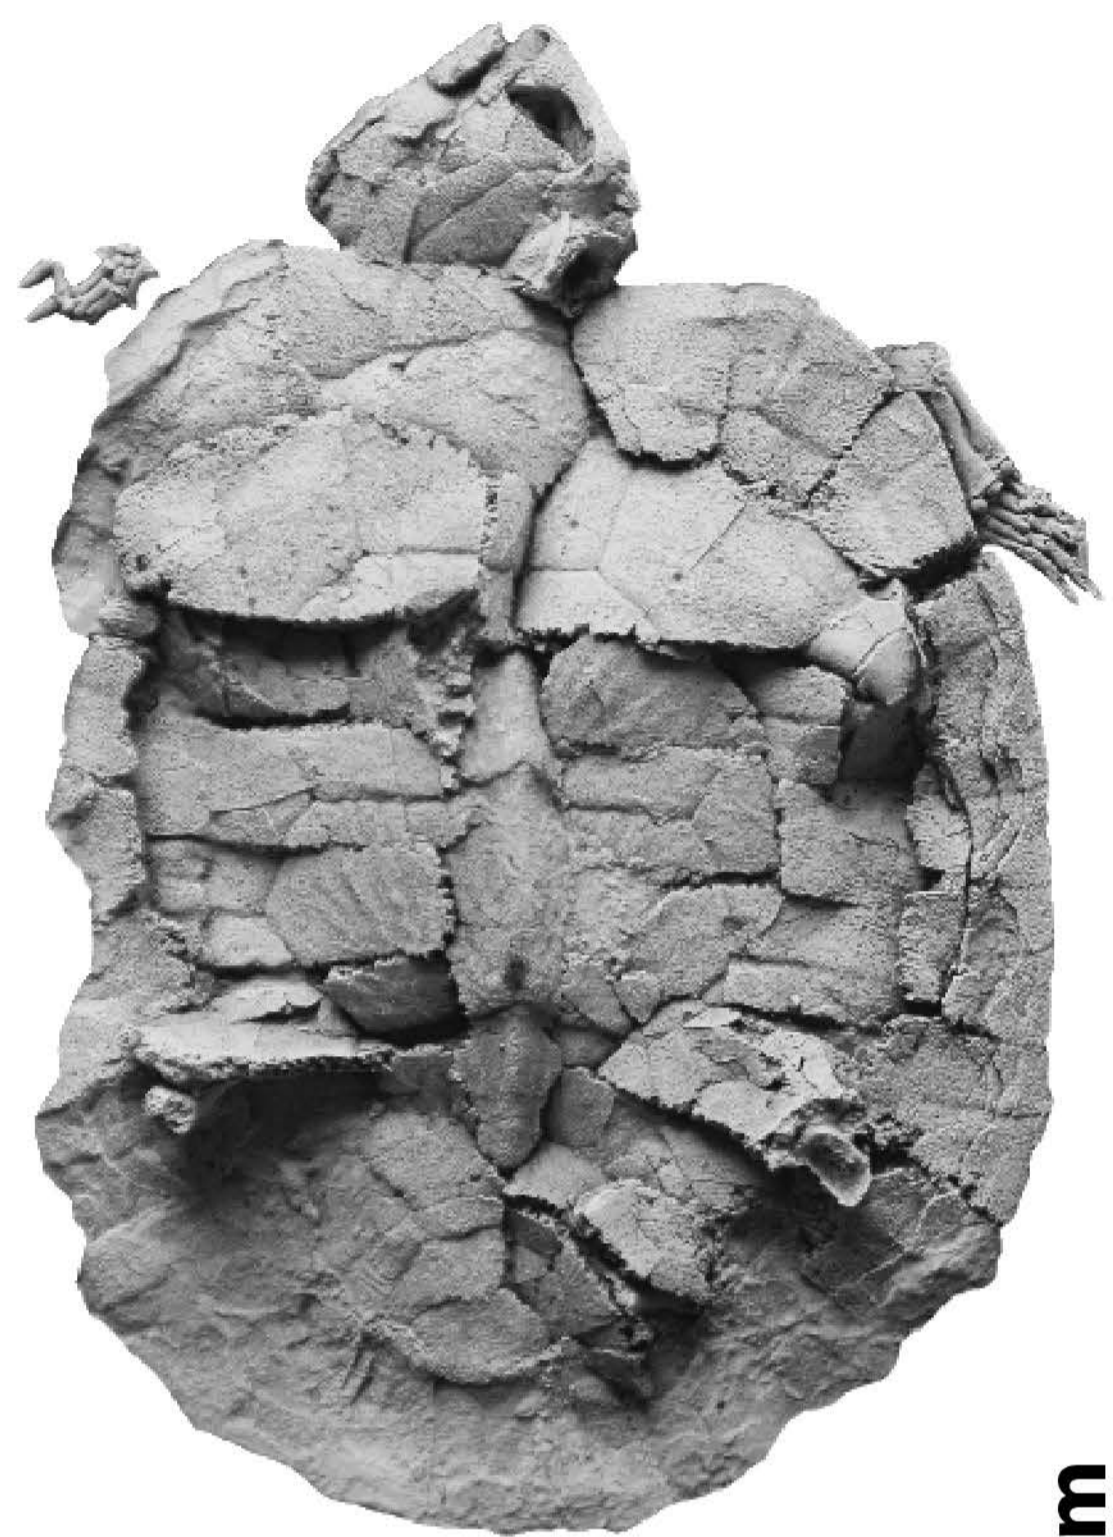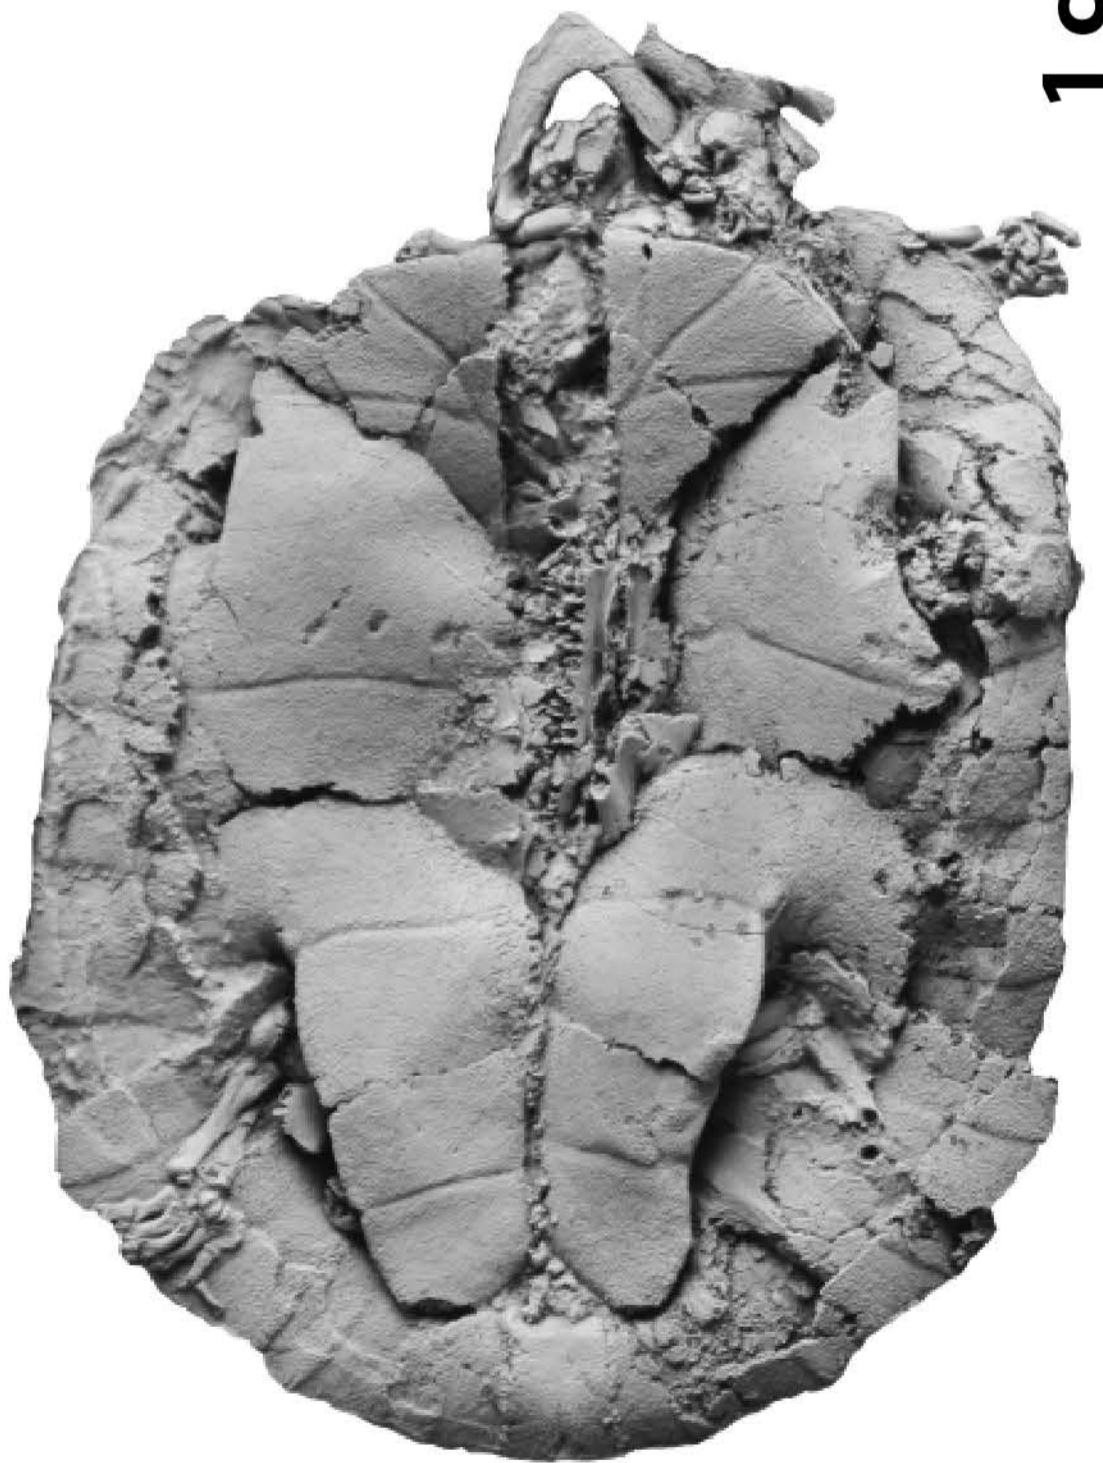

1 cm



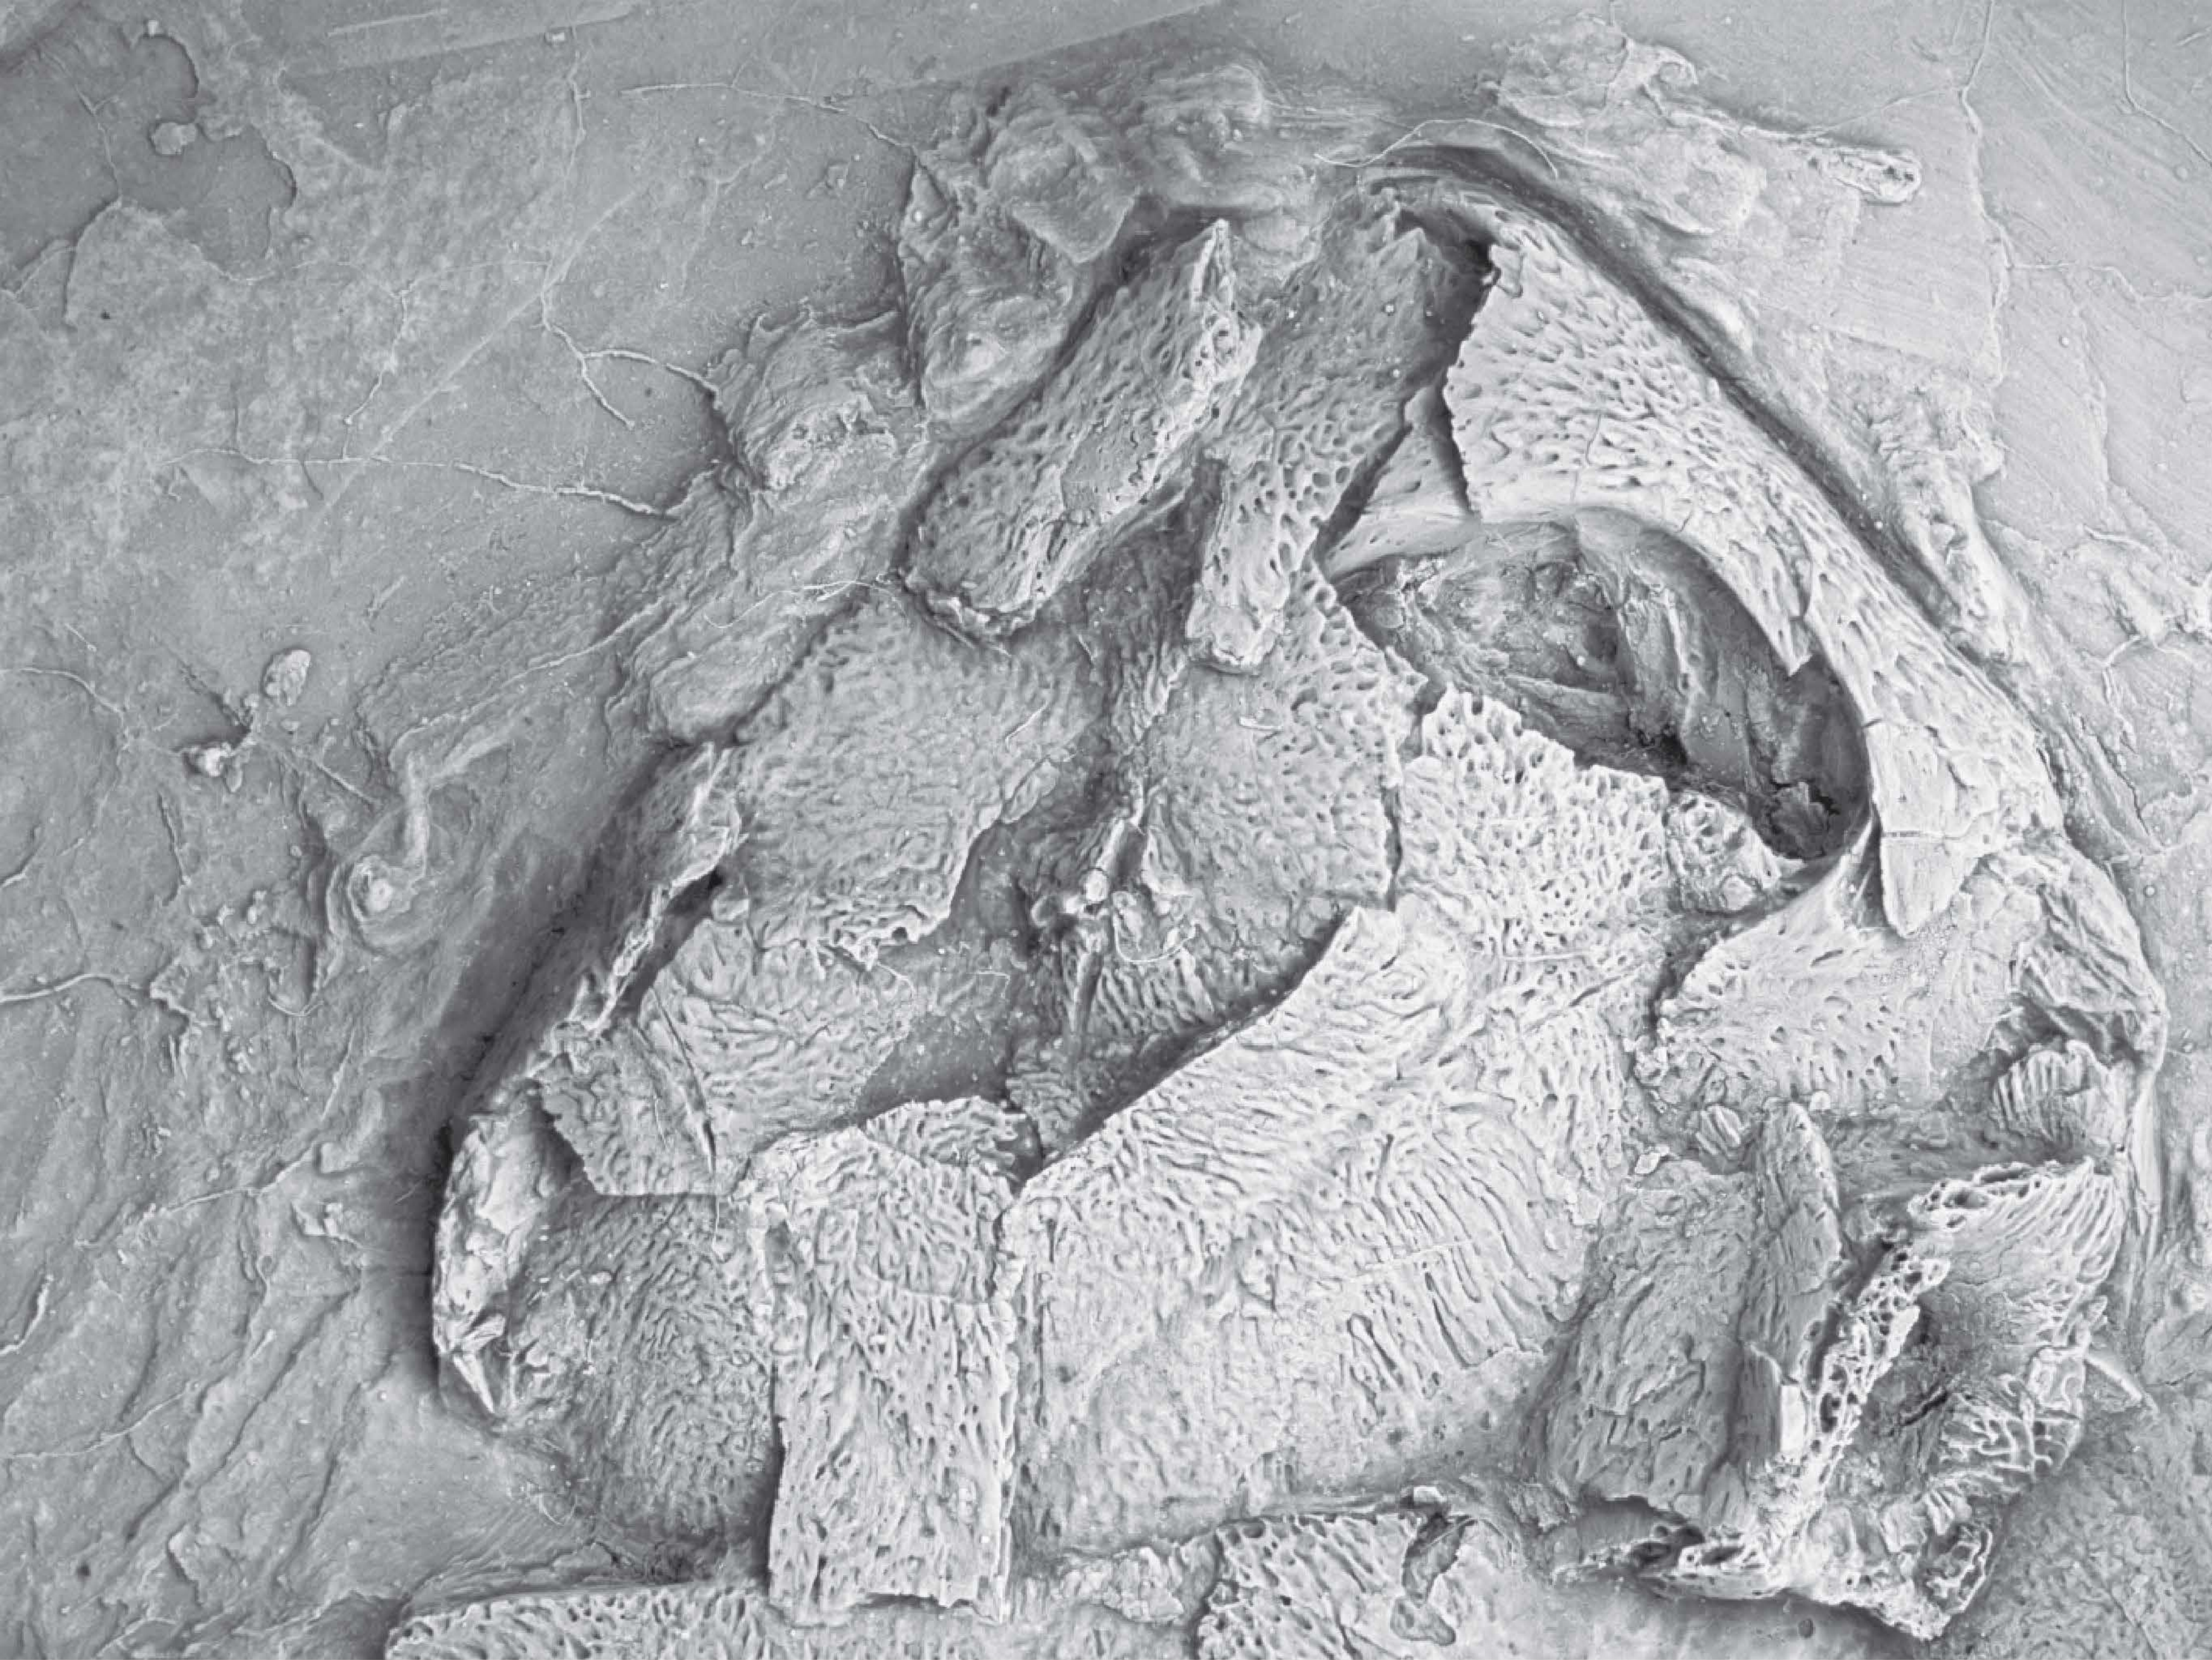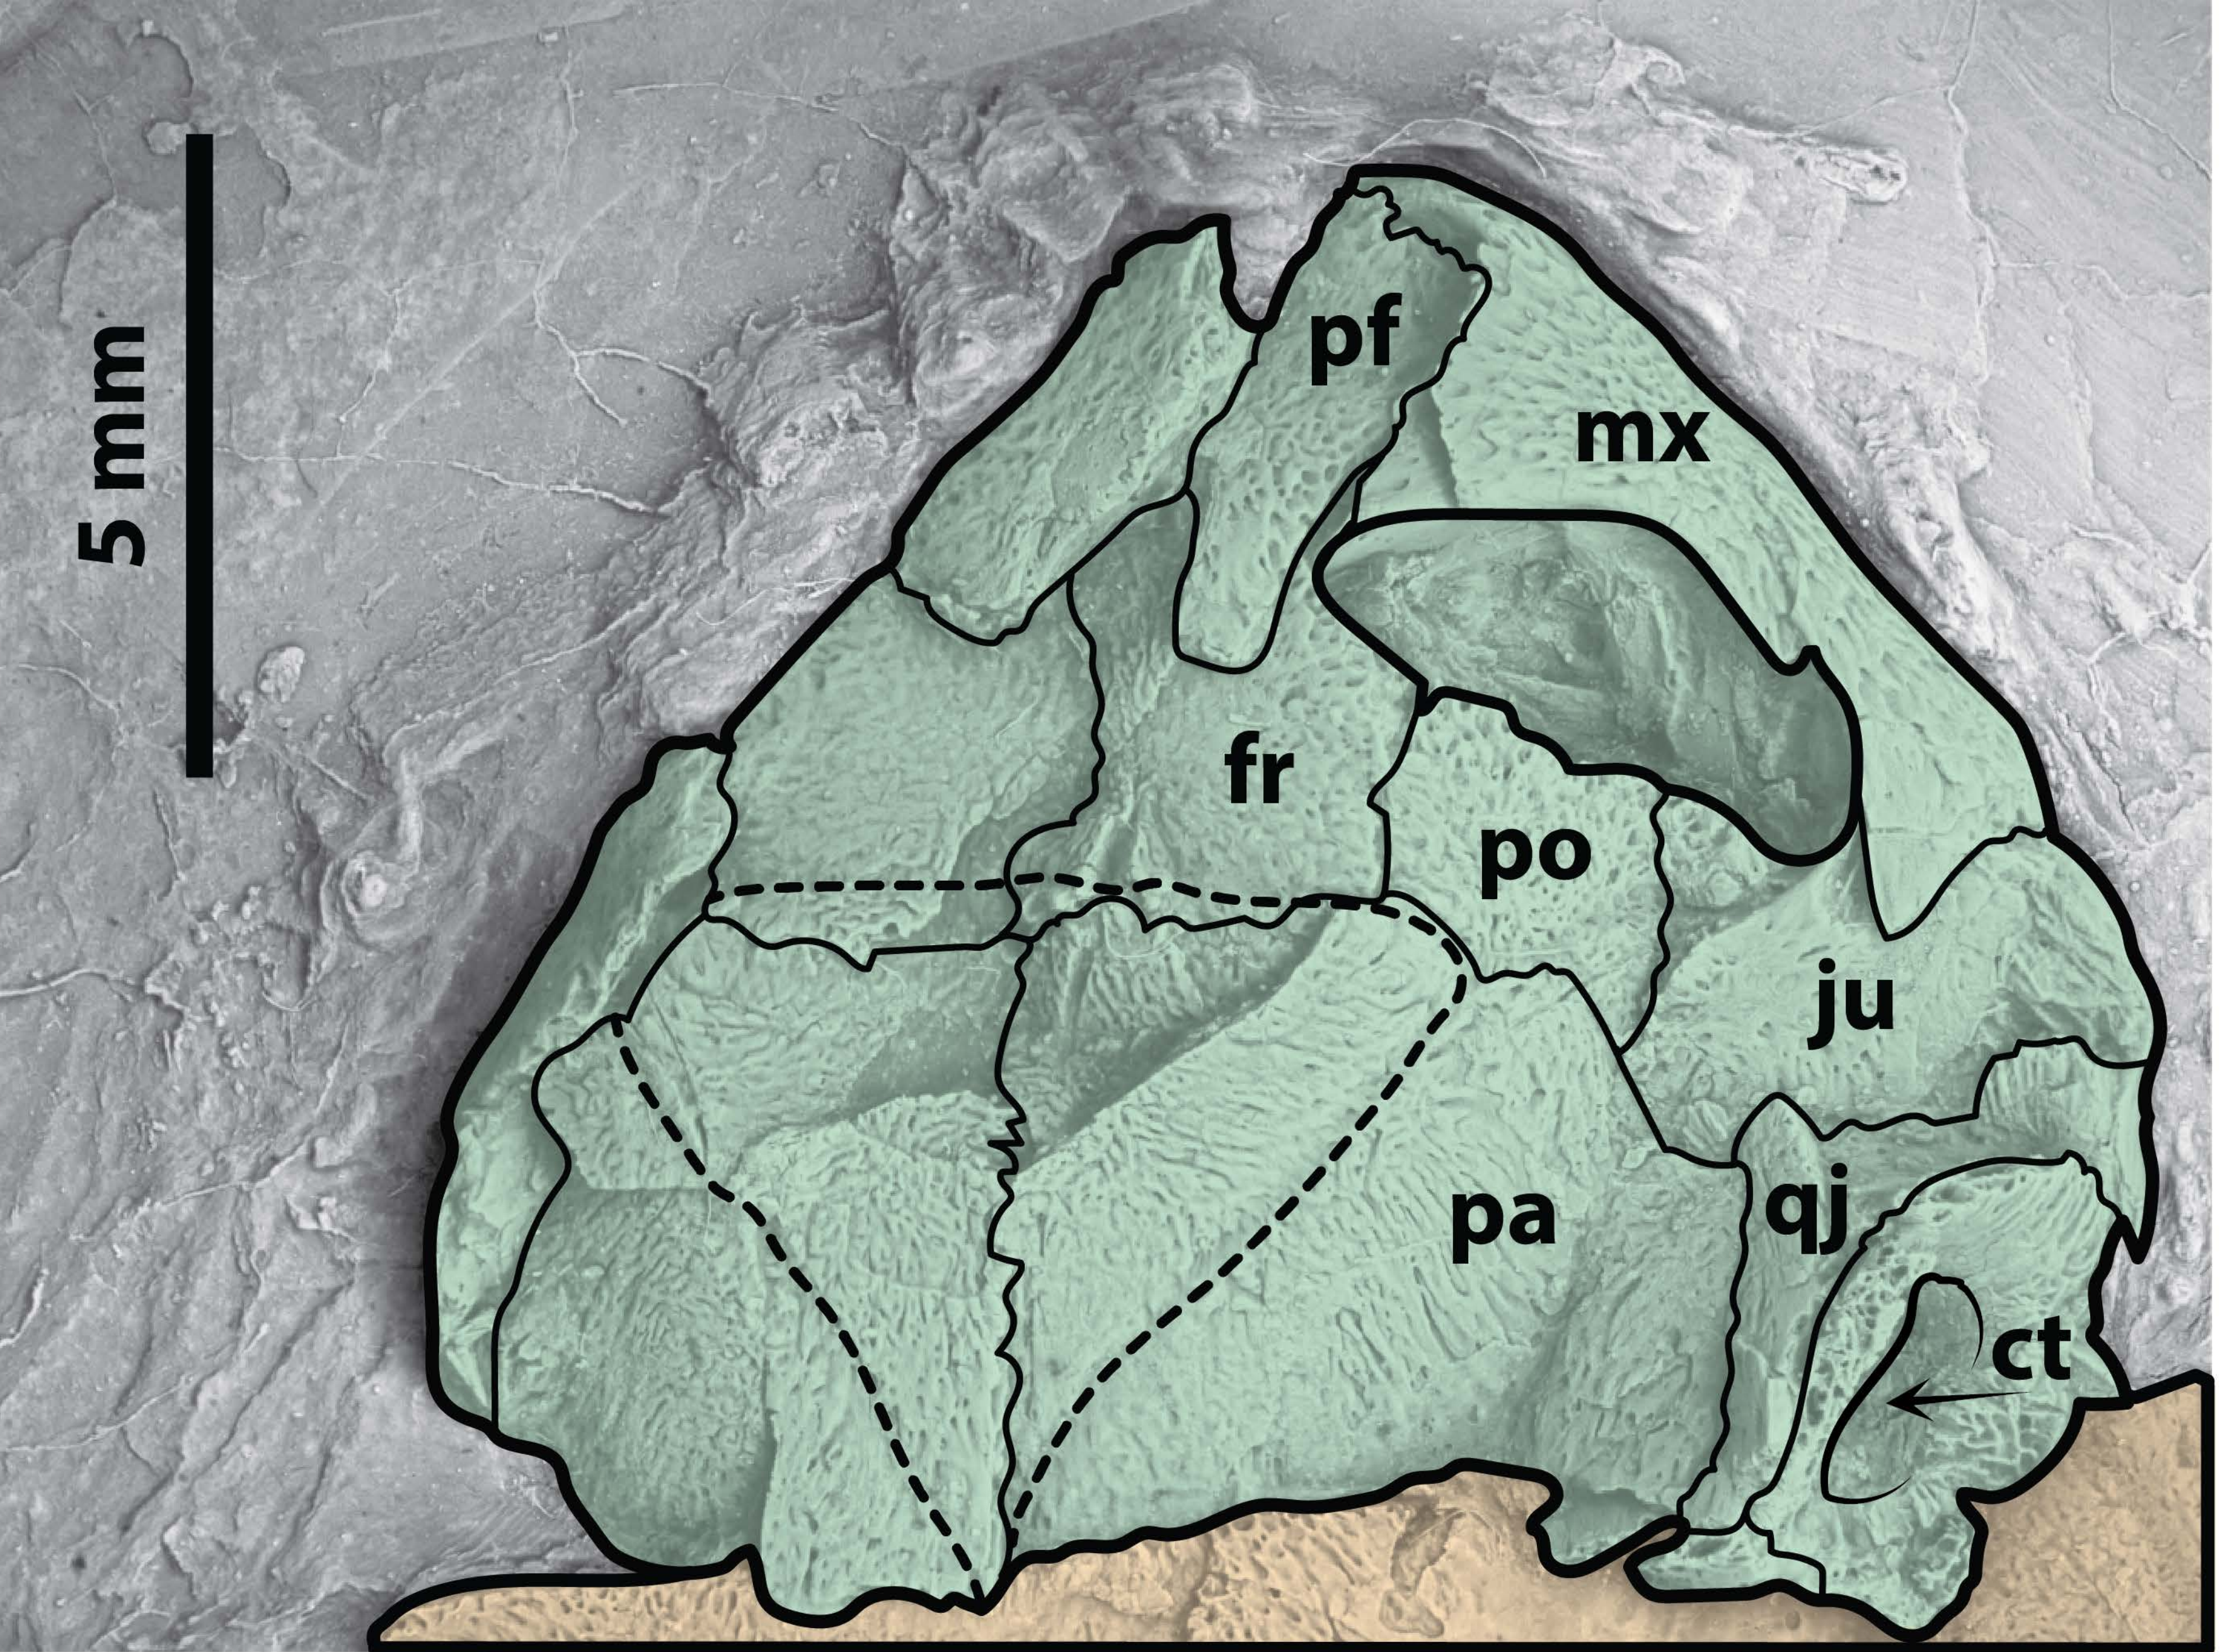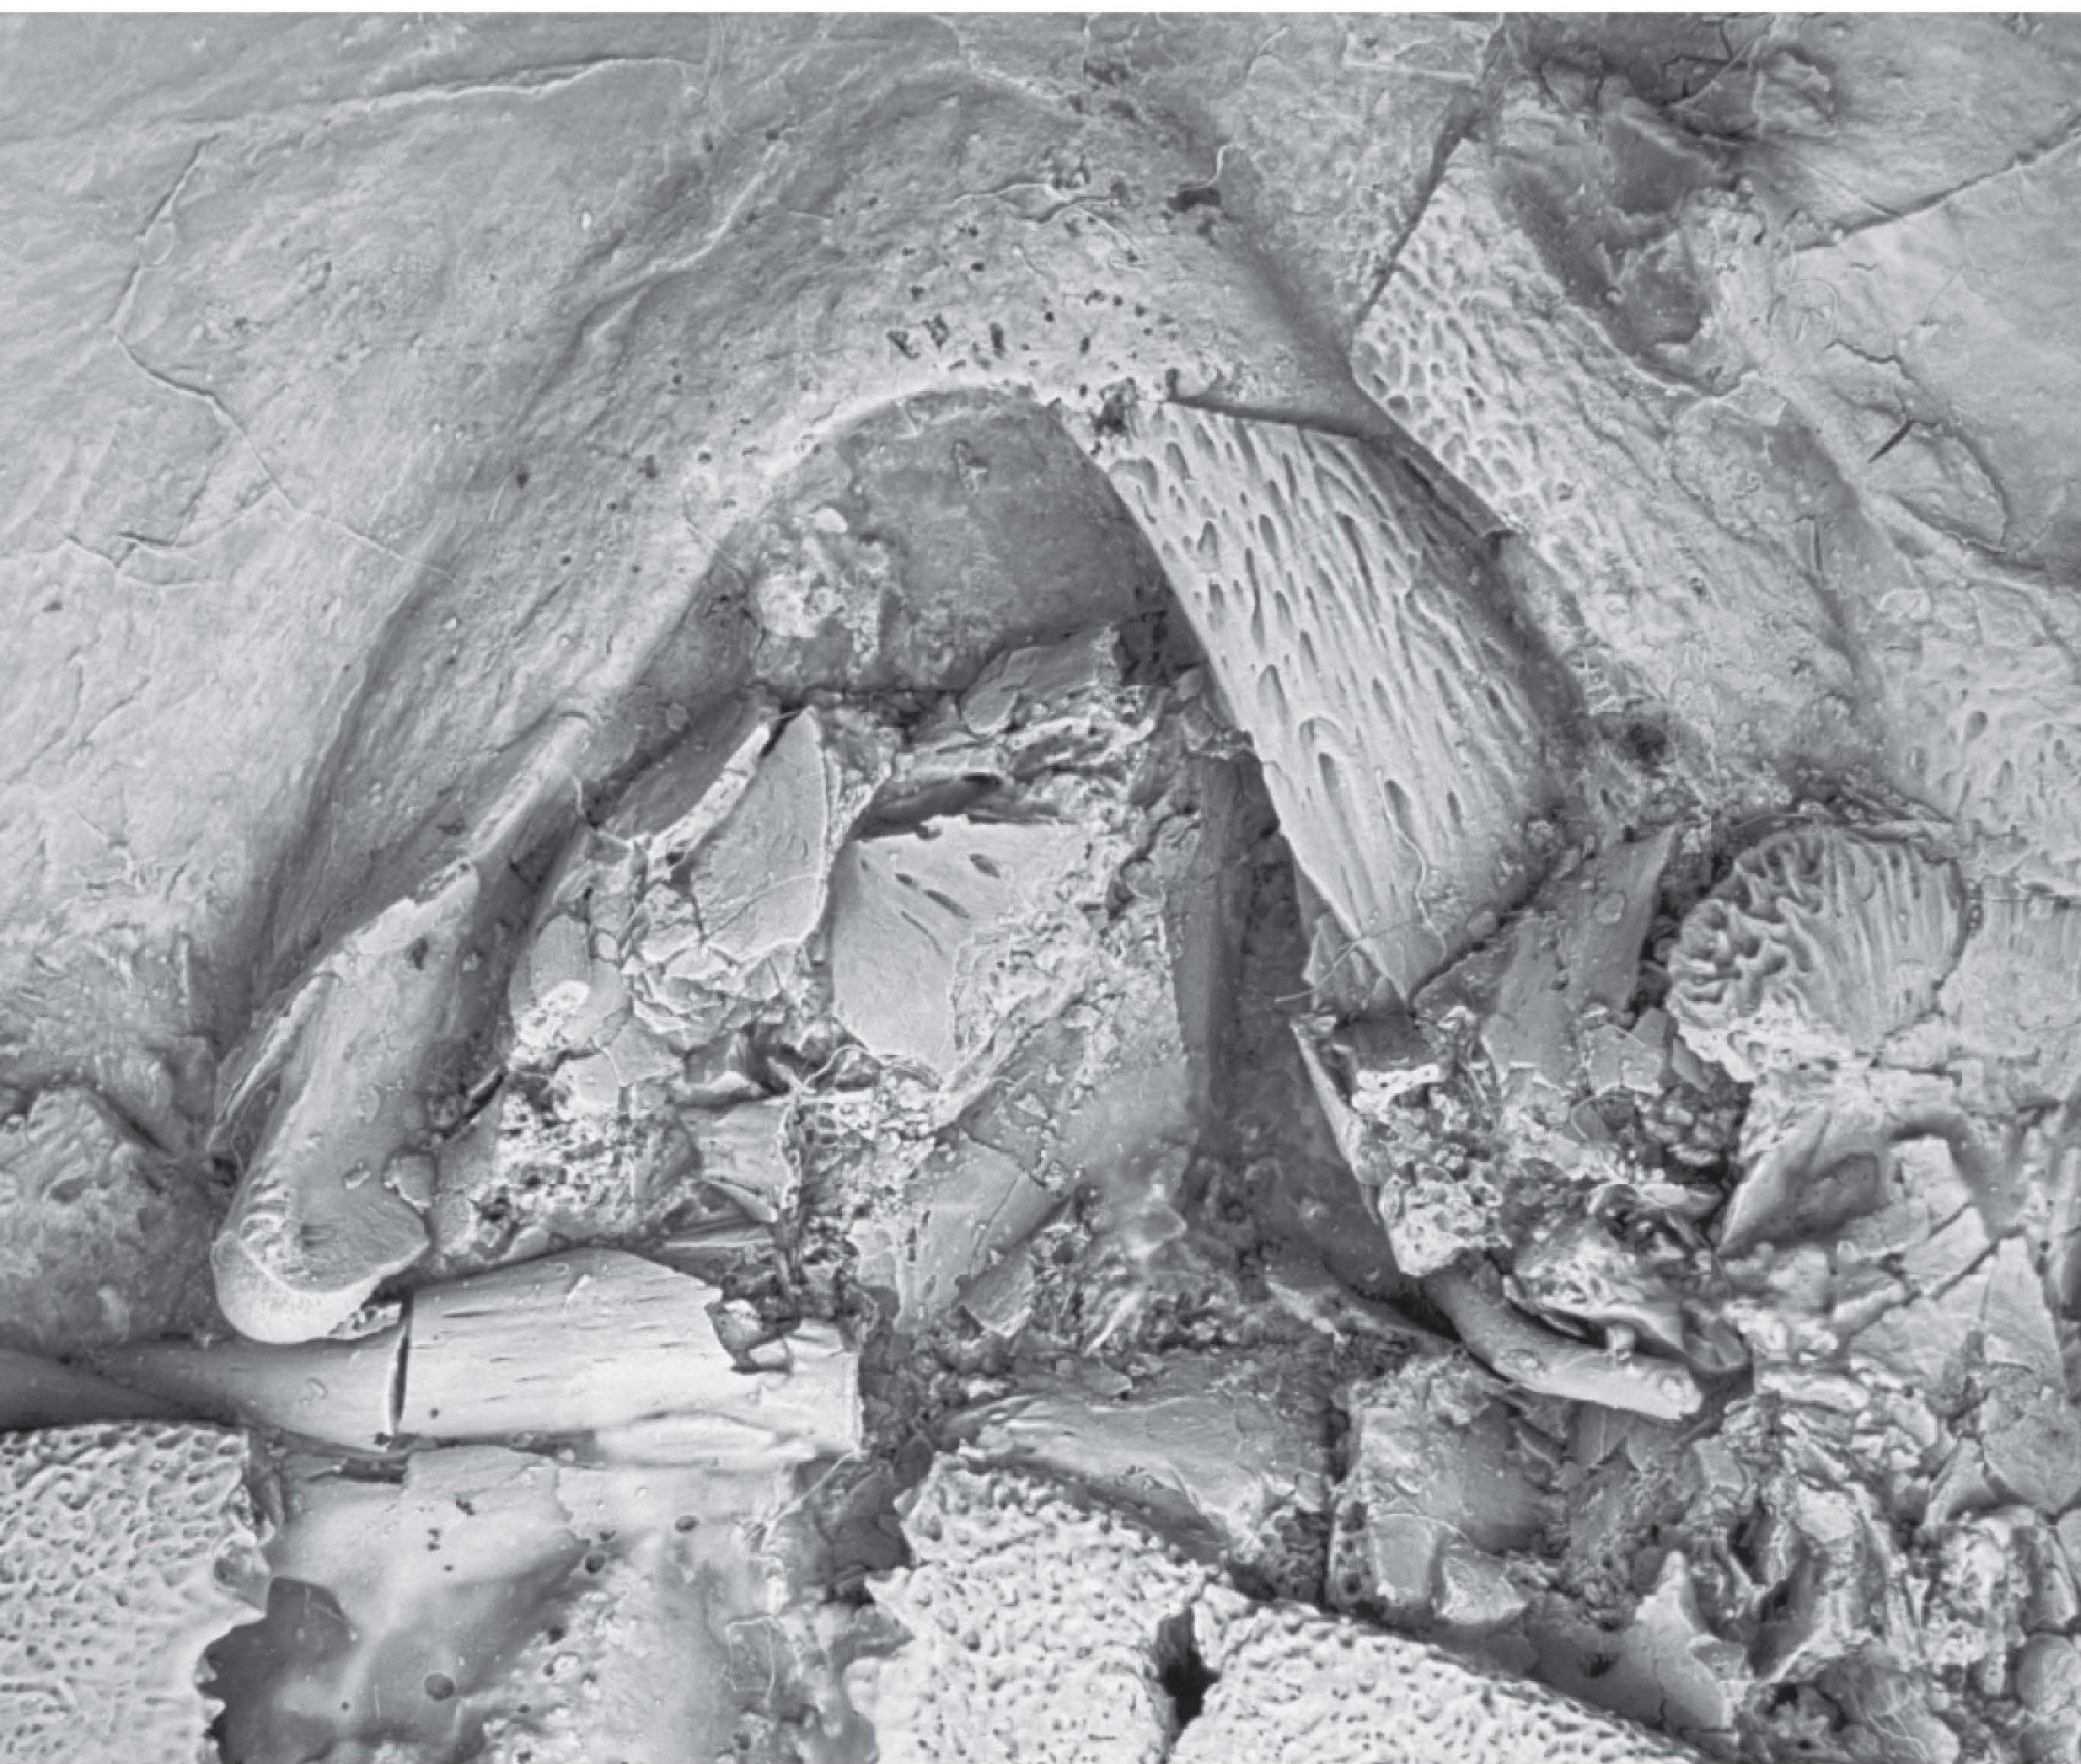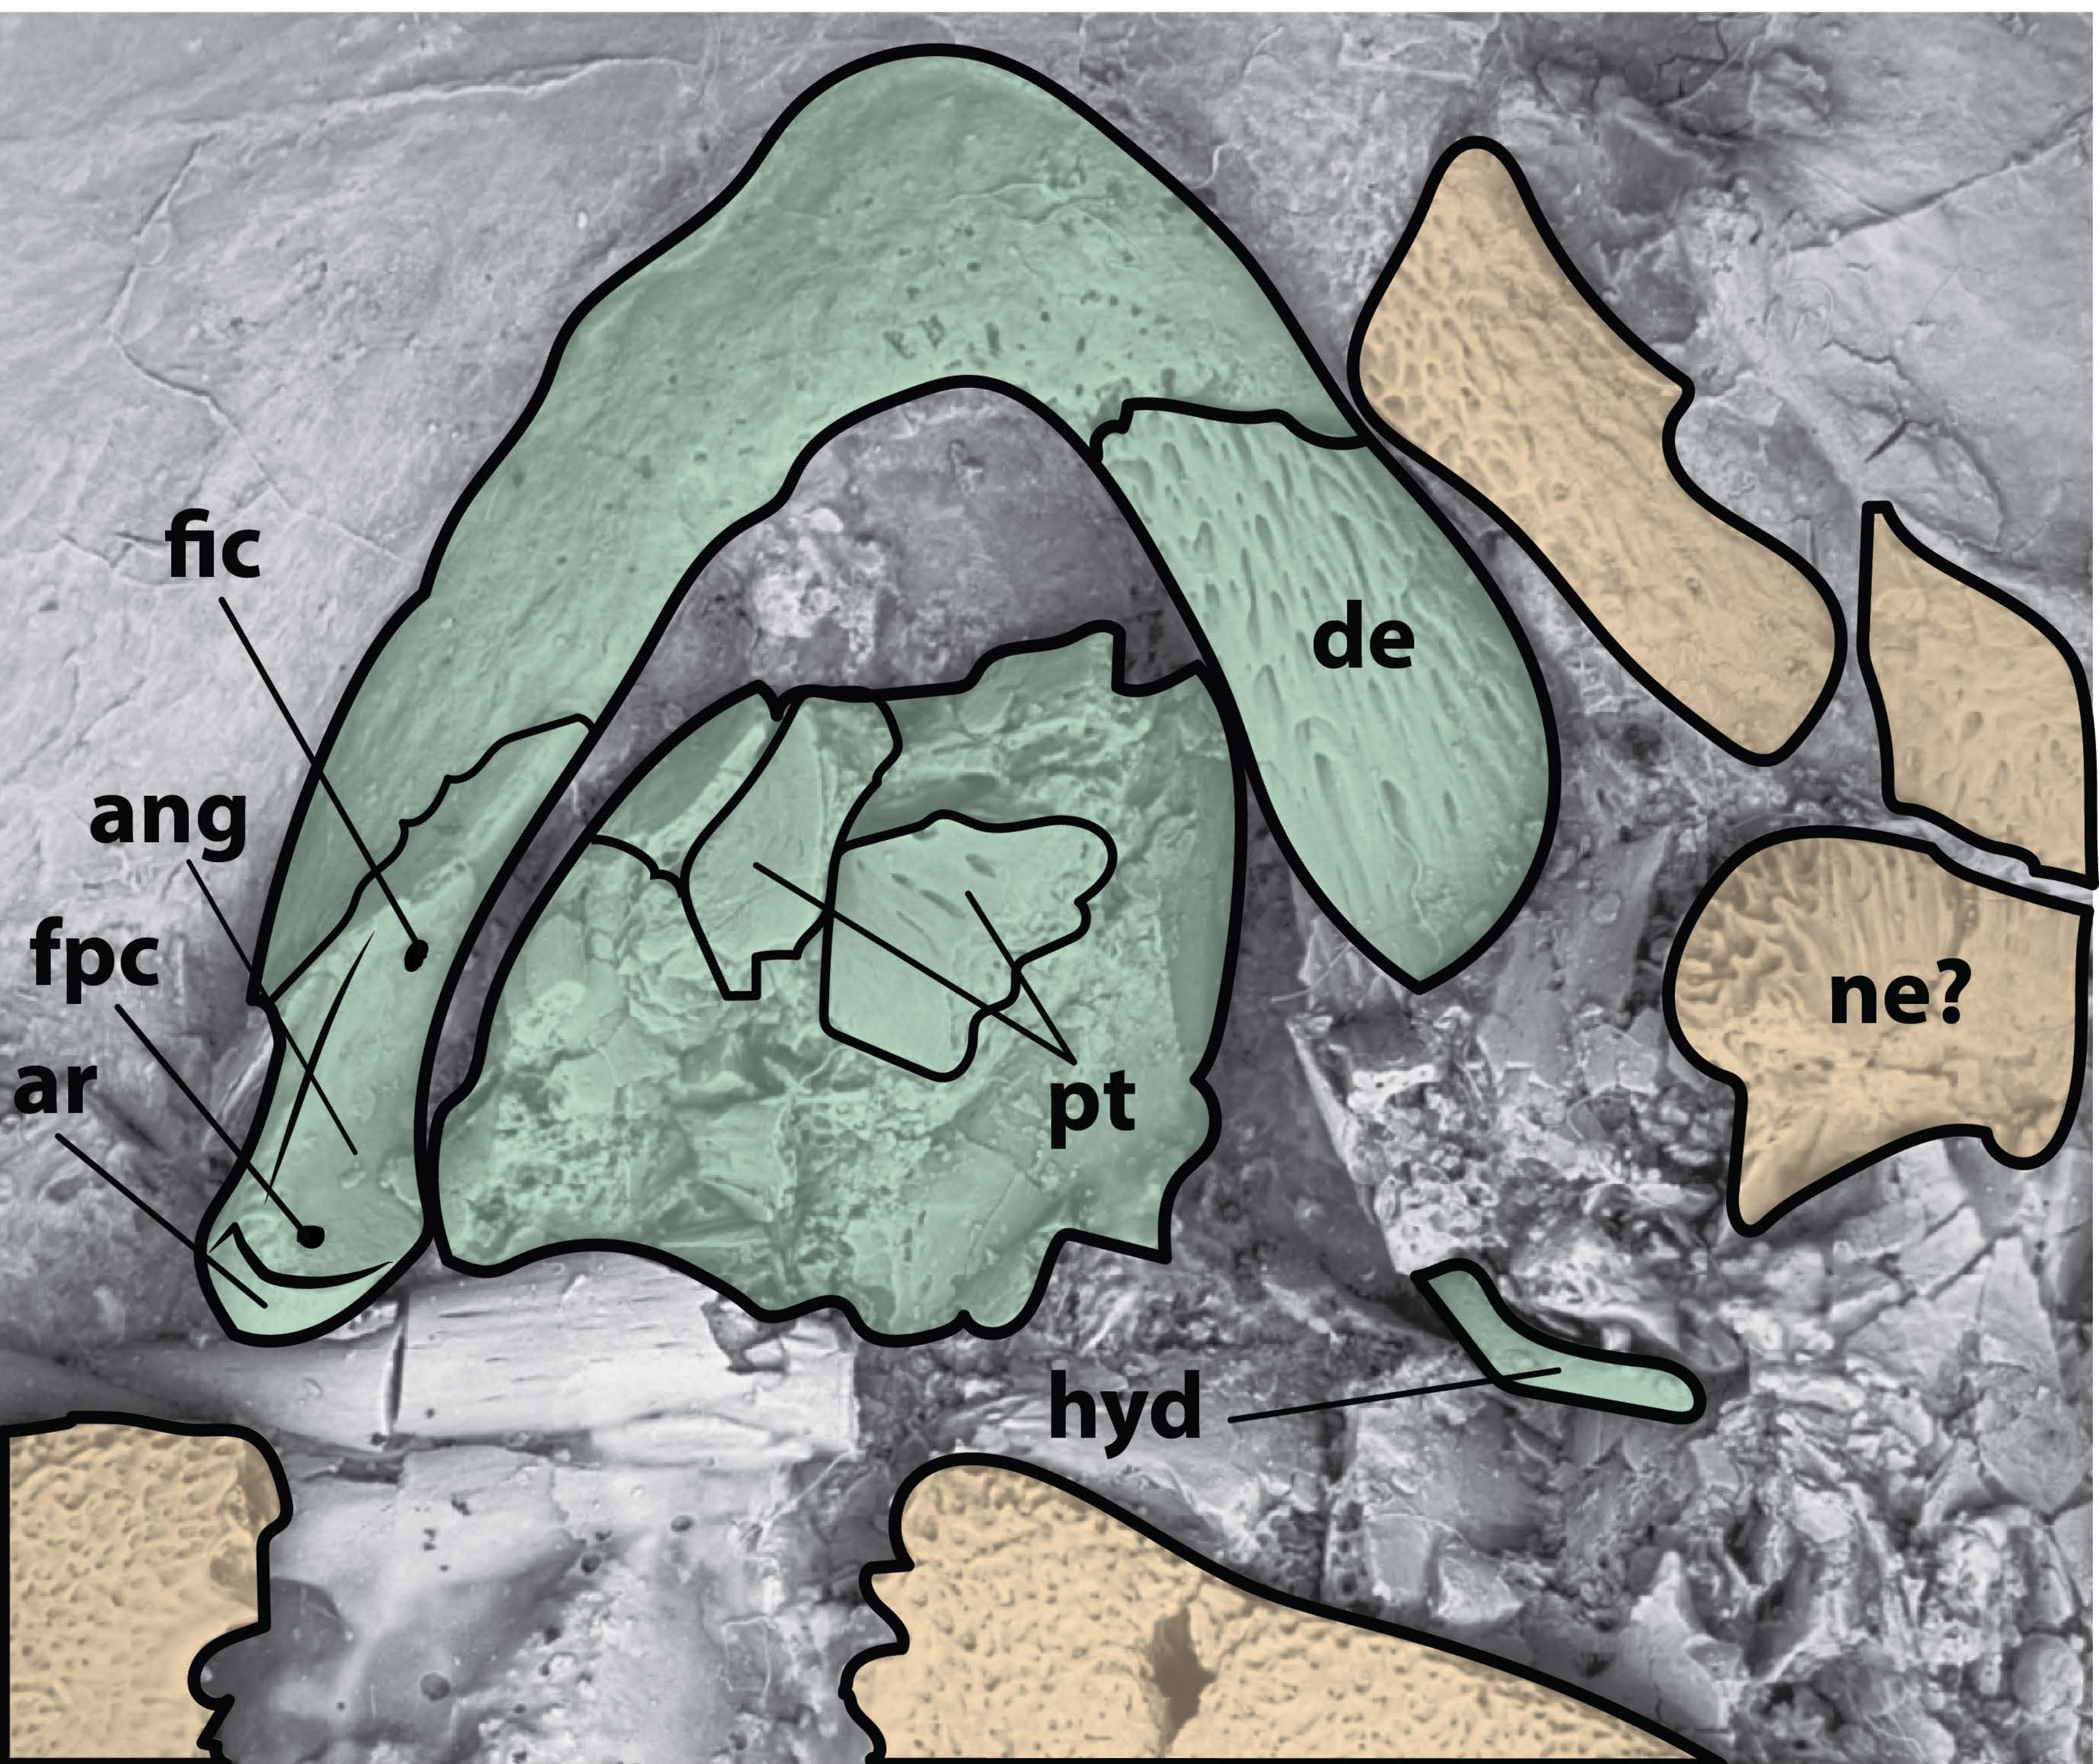

Plate 4. *Neochelys franzeni* HLMD ME 14981 skull, dorsal(top), ventral (bottom)



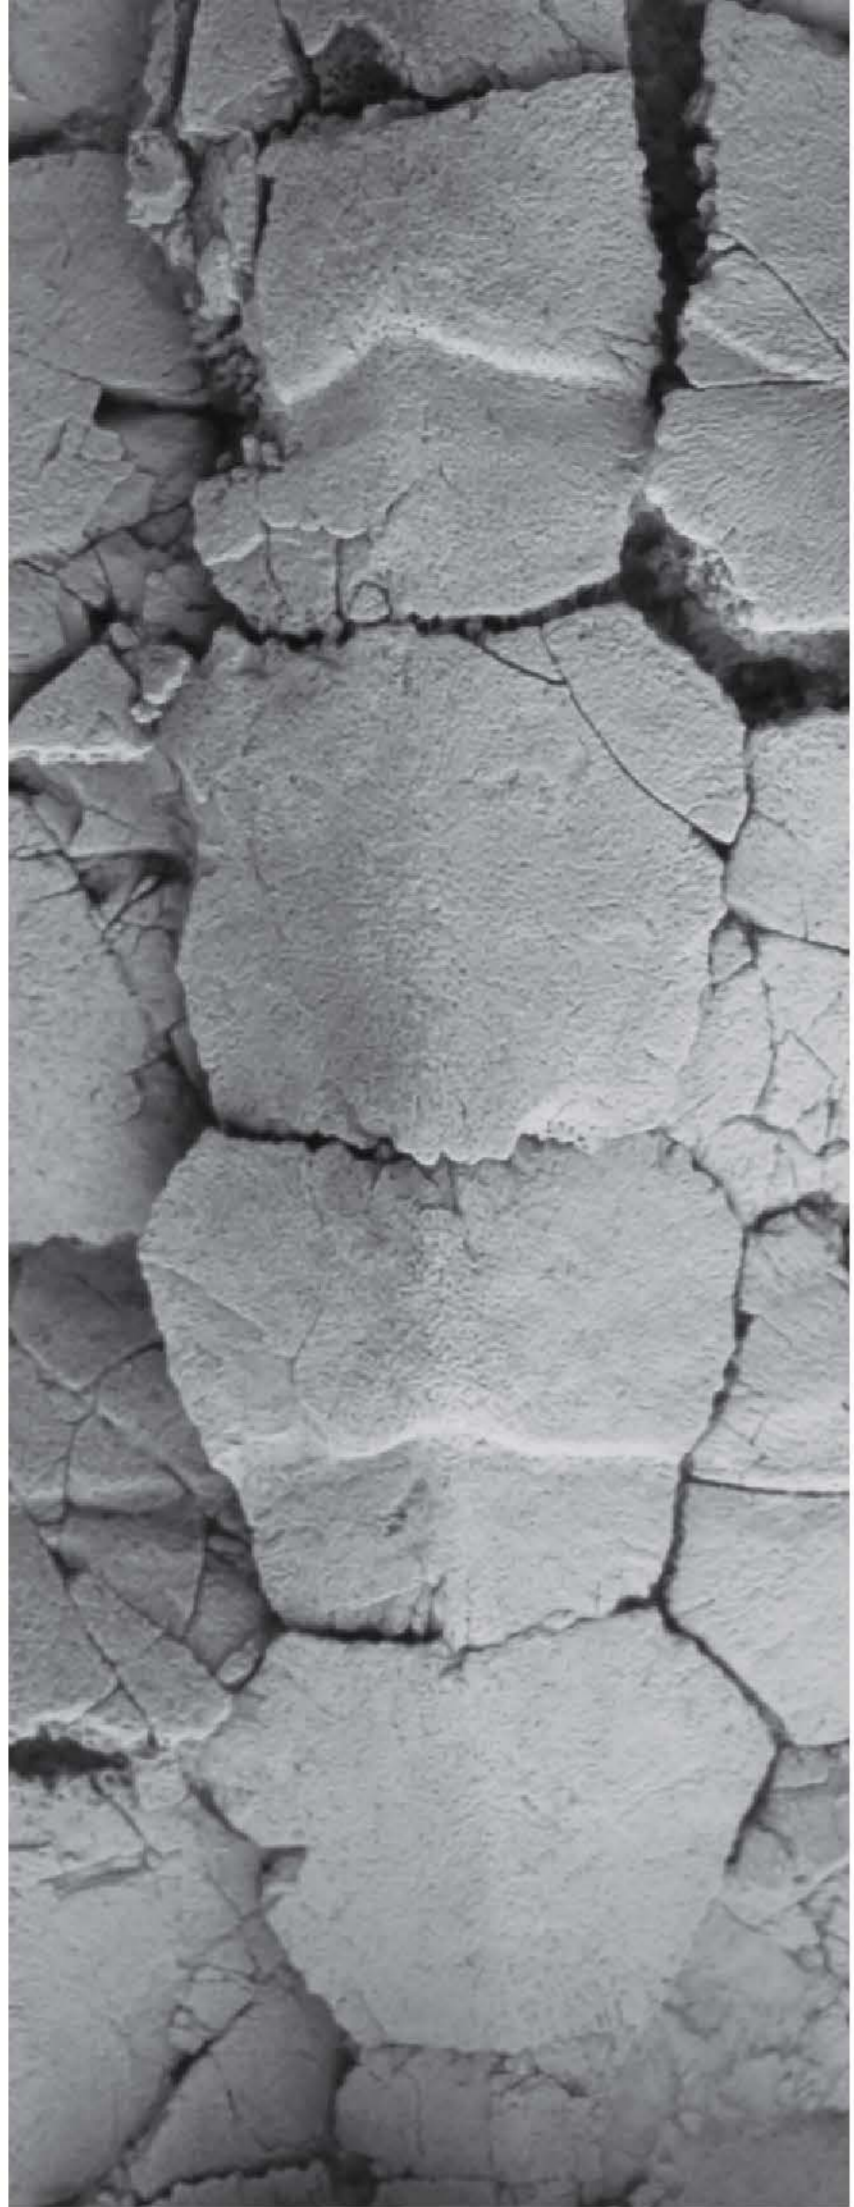

Neurals and the medial ridge

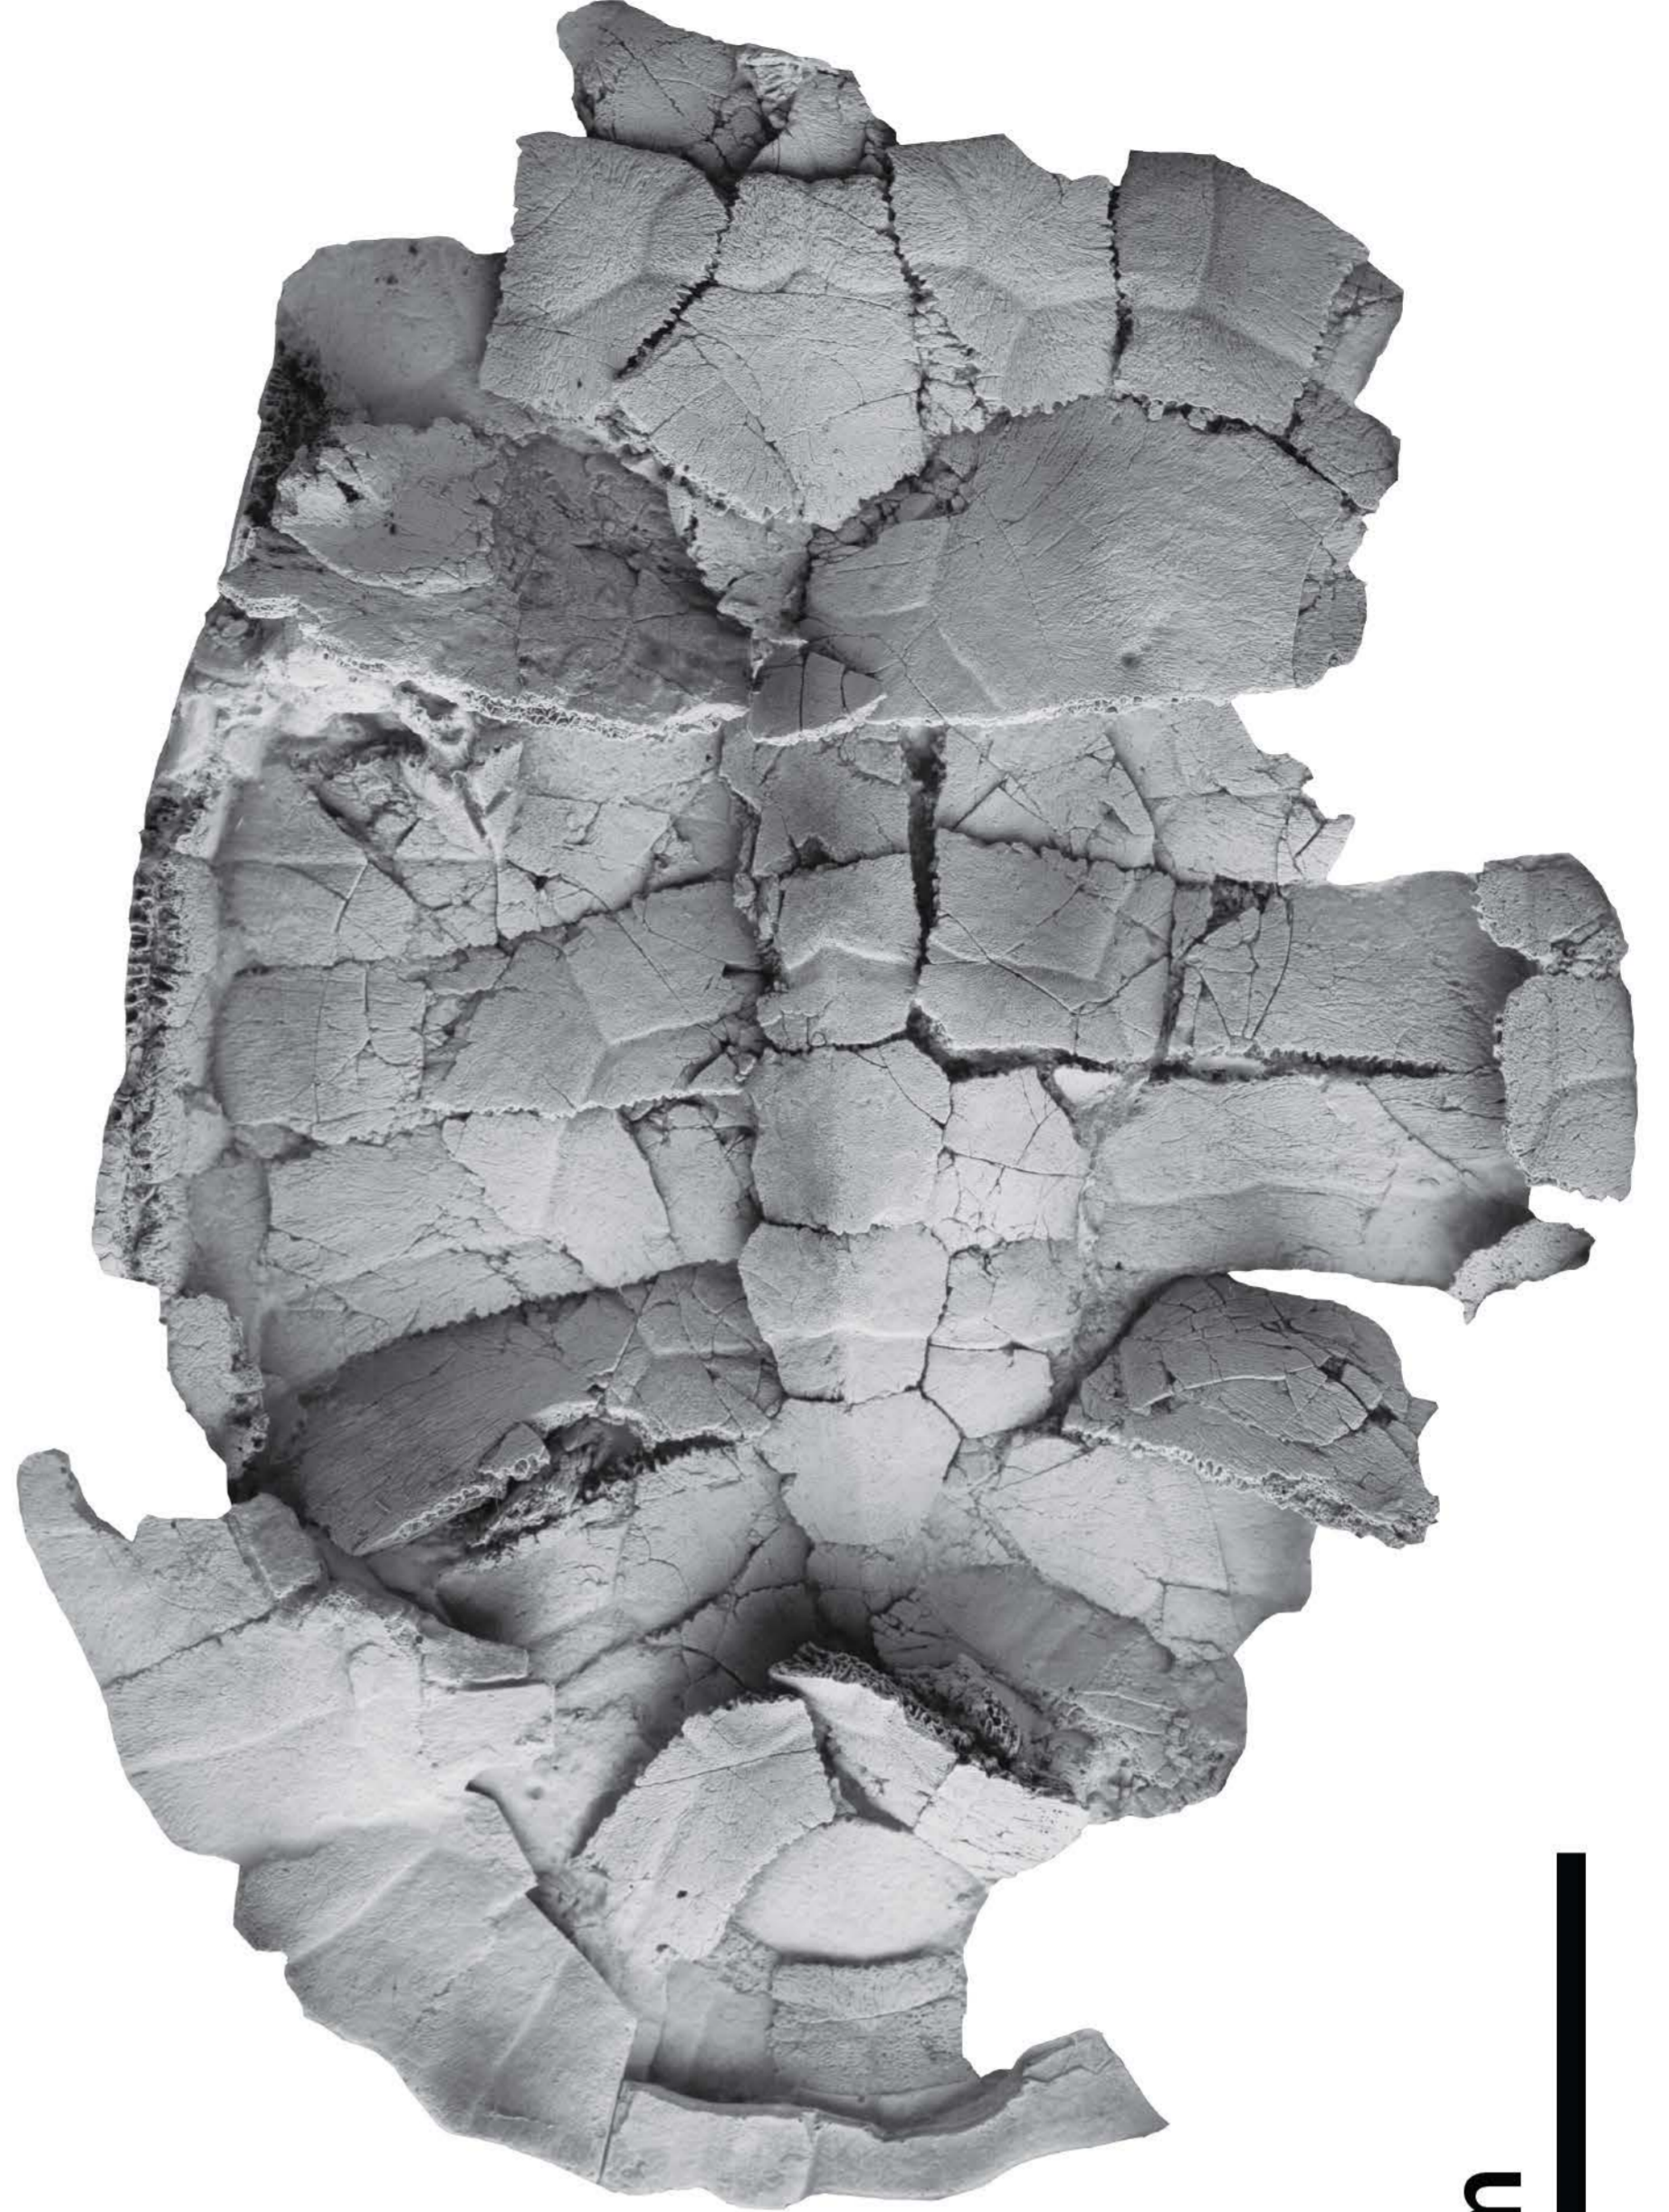

5 cm

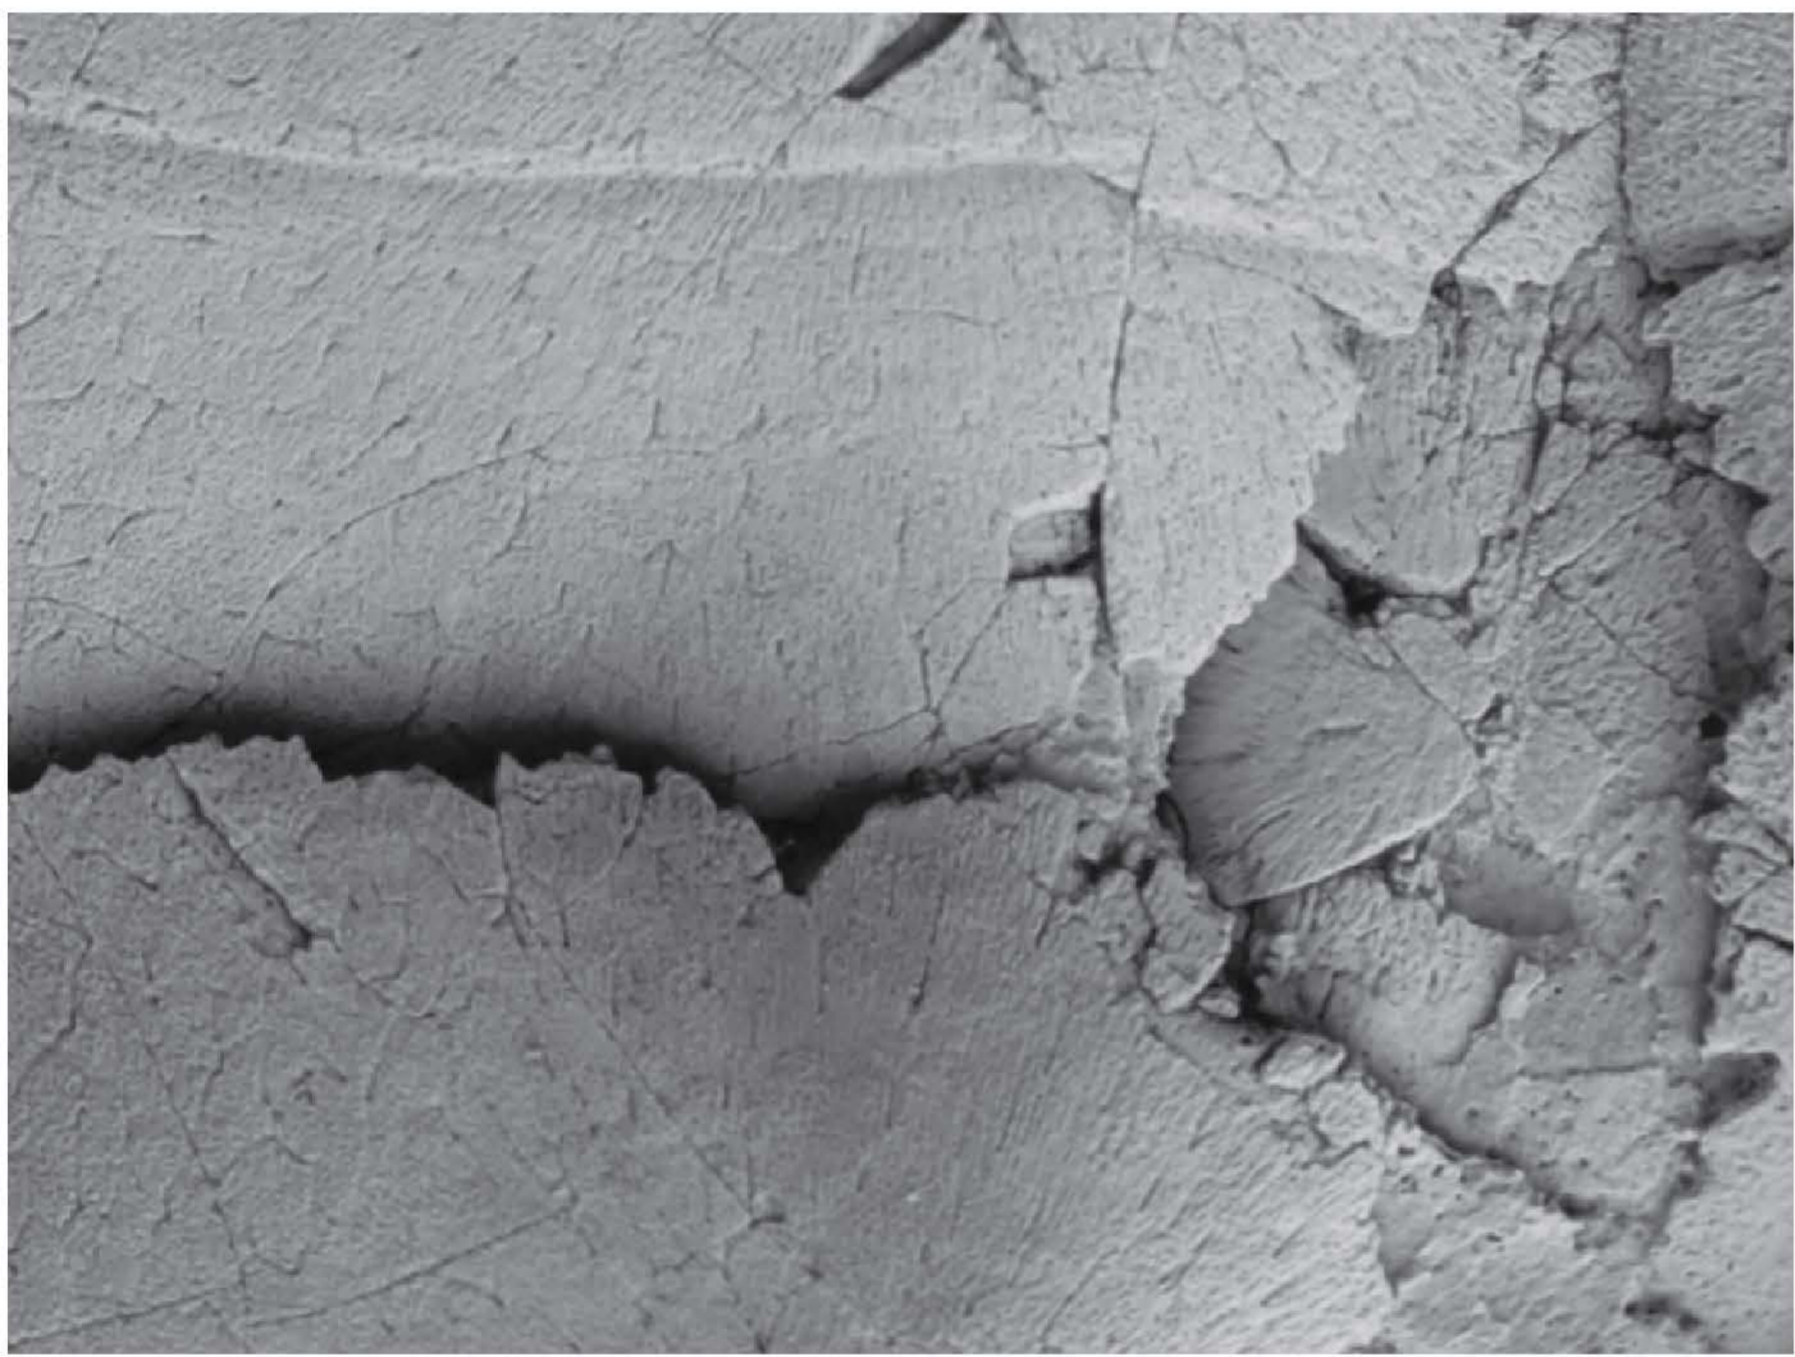

Left mesoplastron, pec-abd sulcus

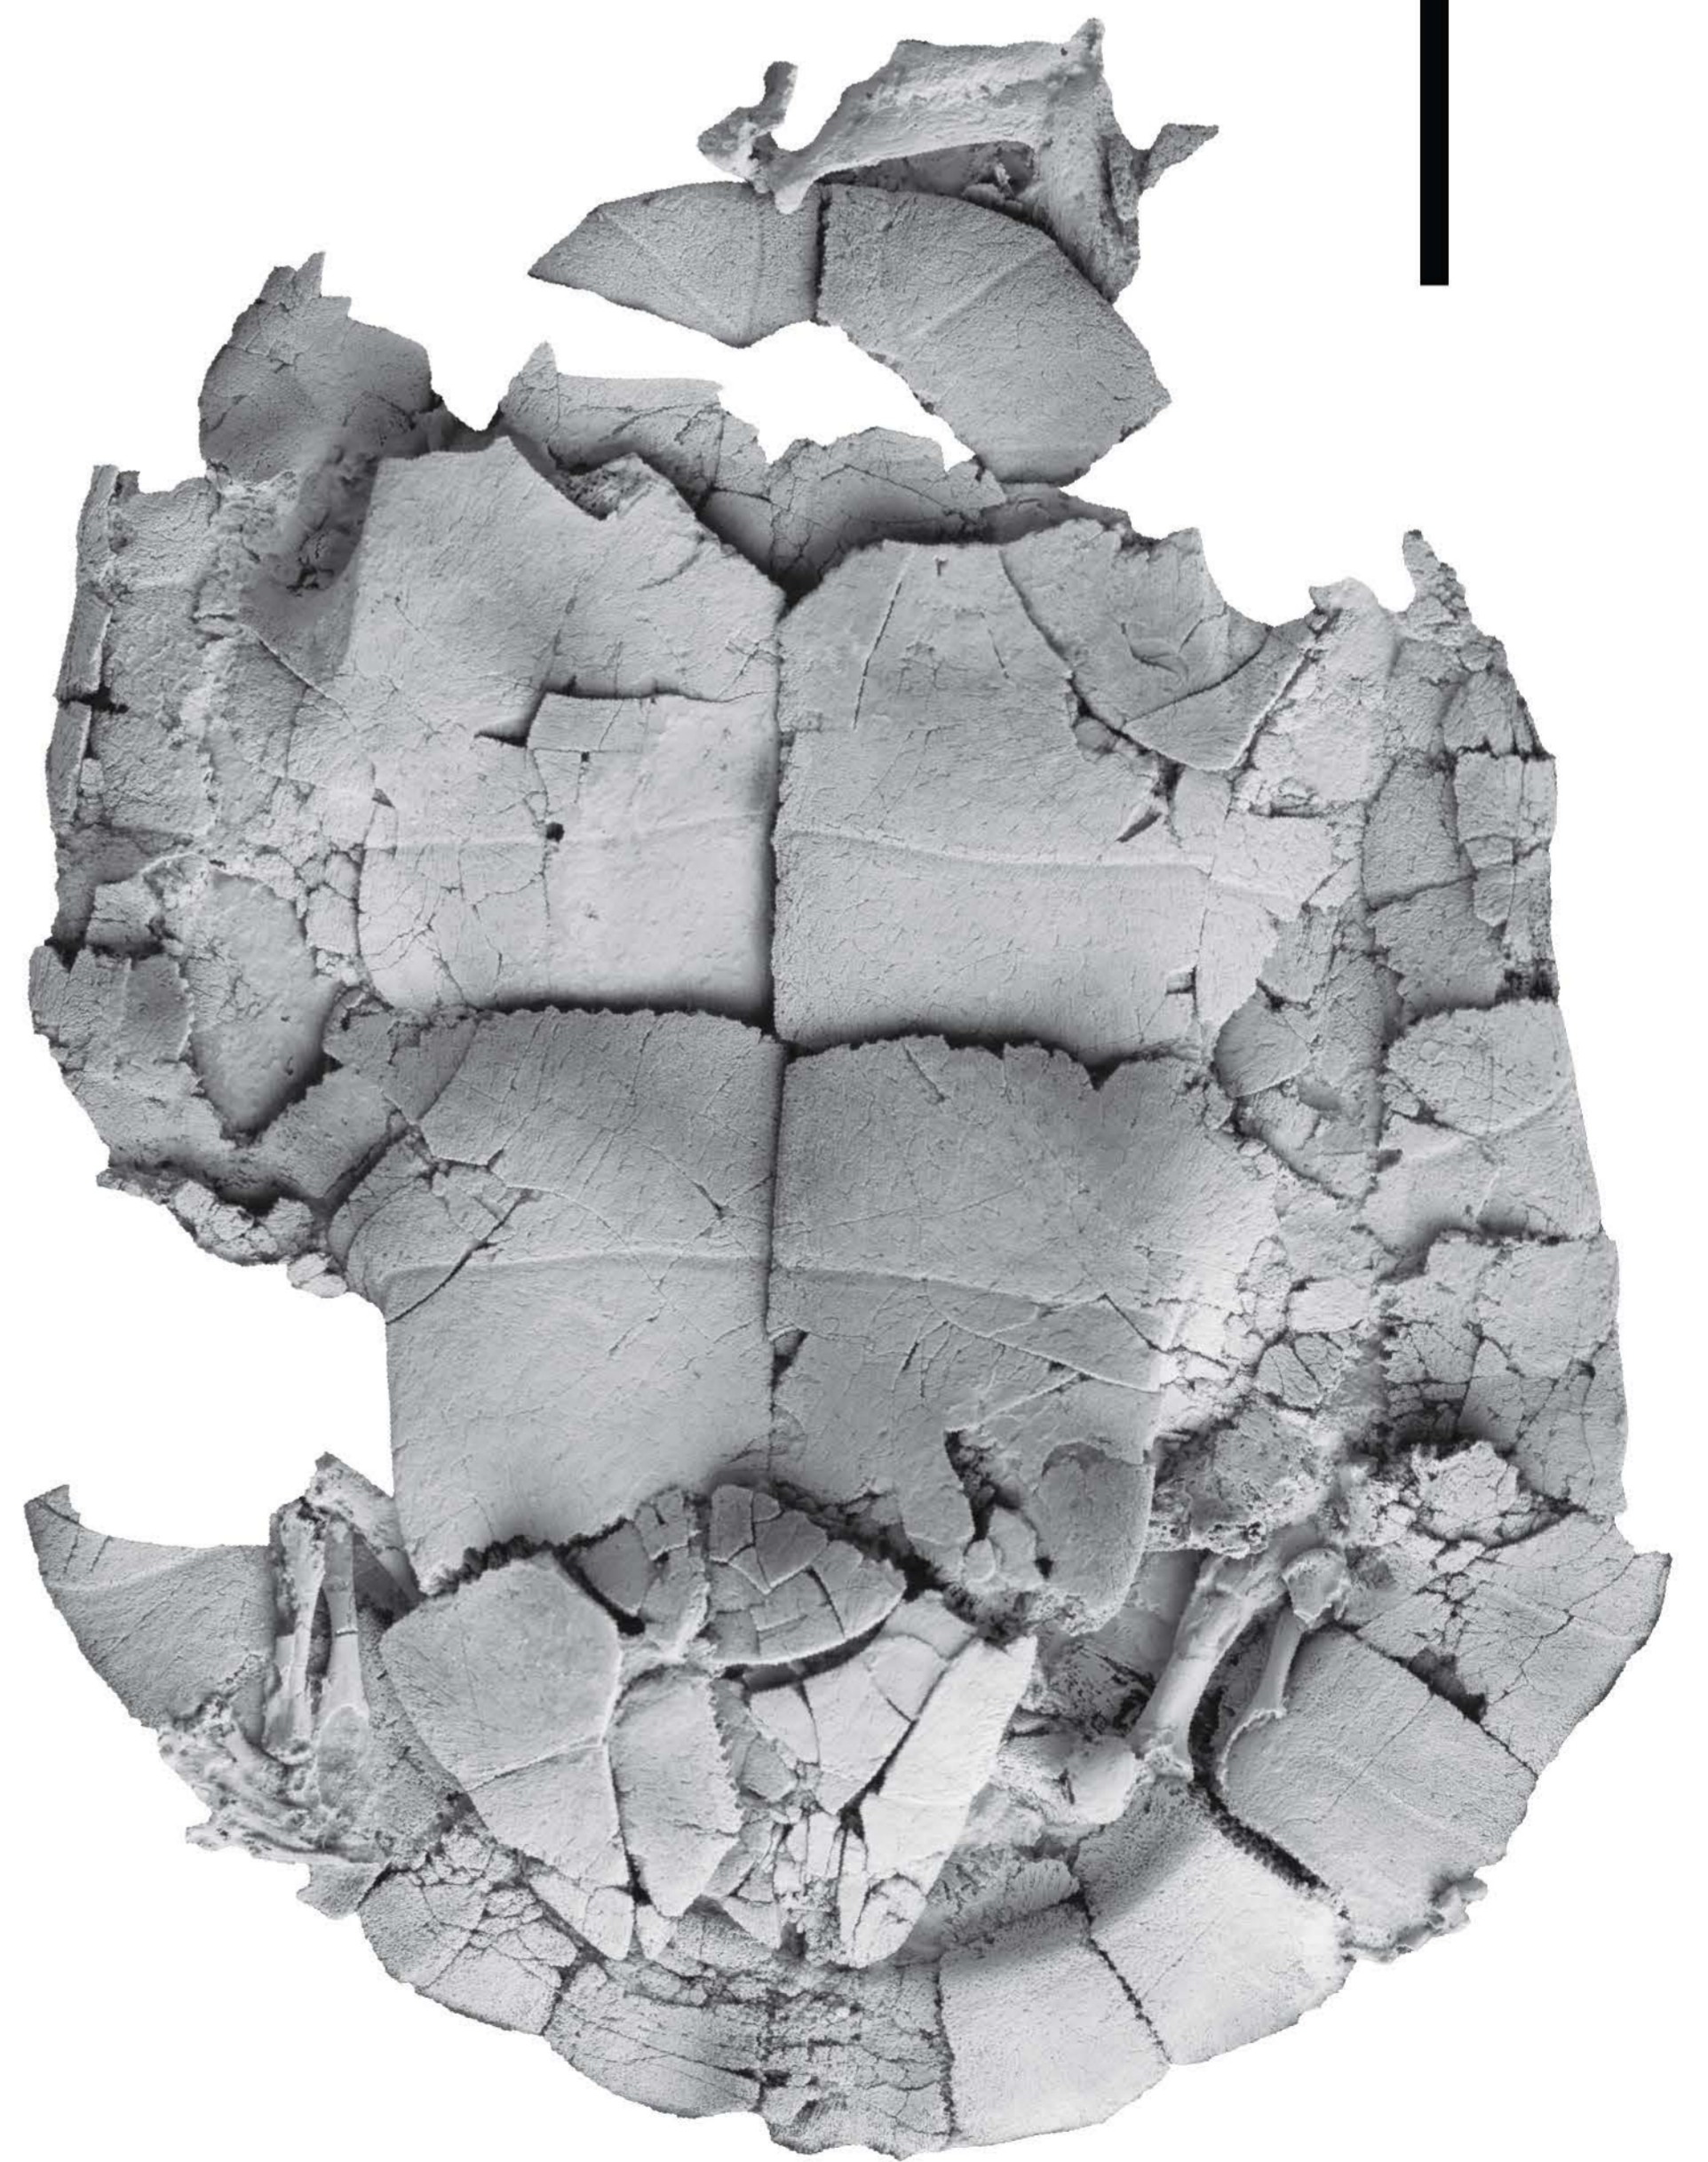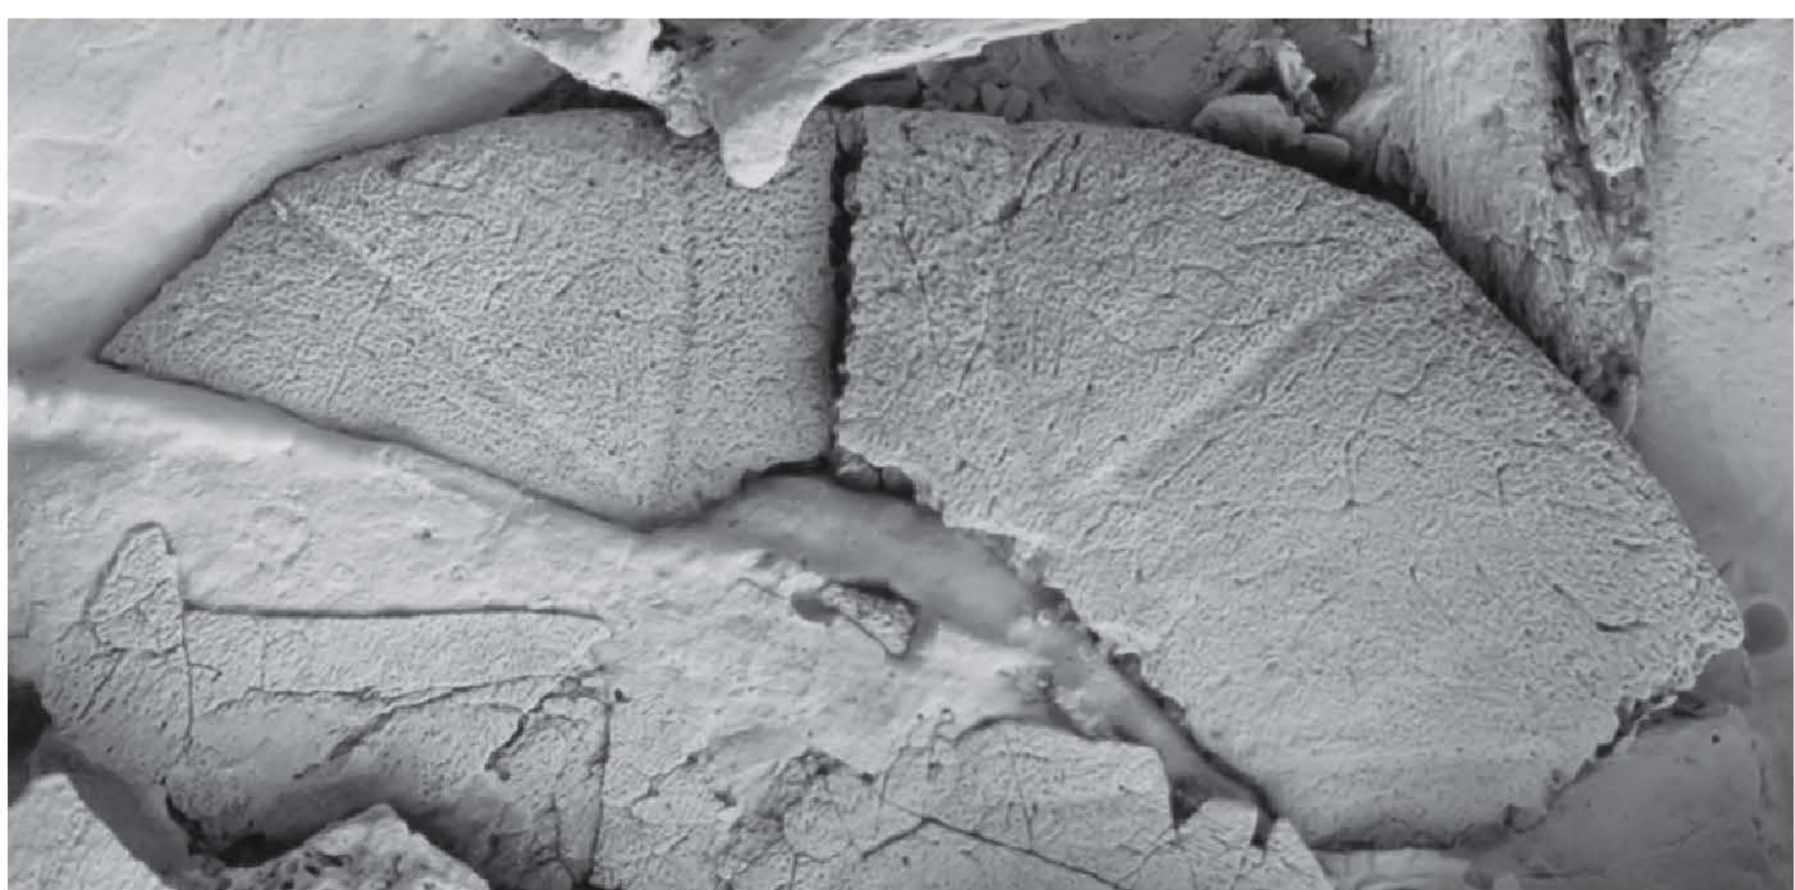

Epiplastra



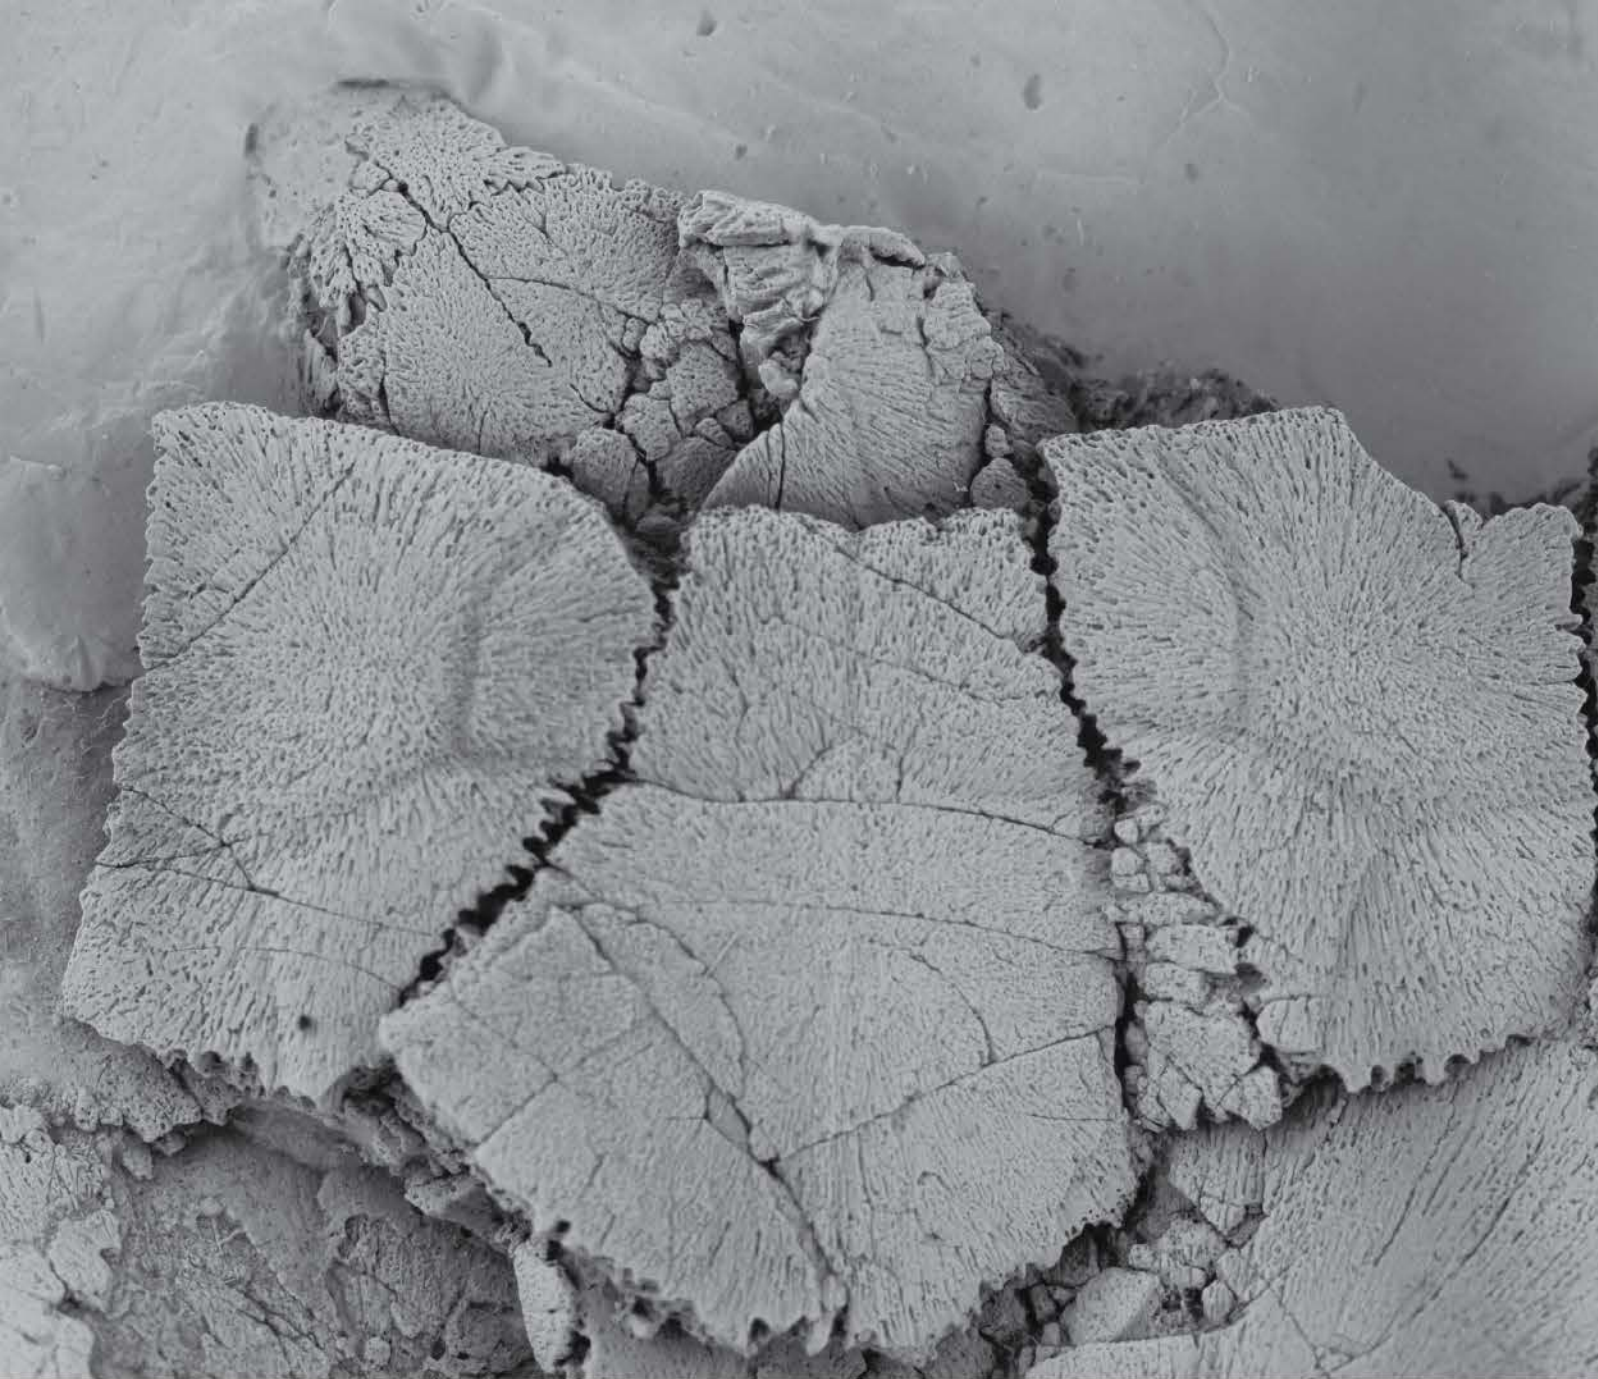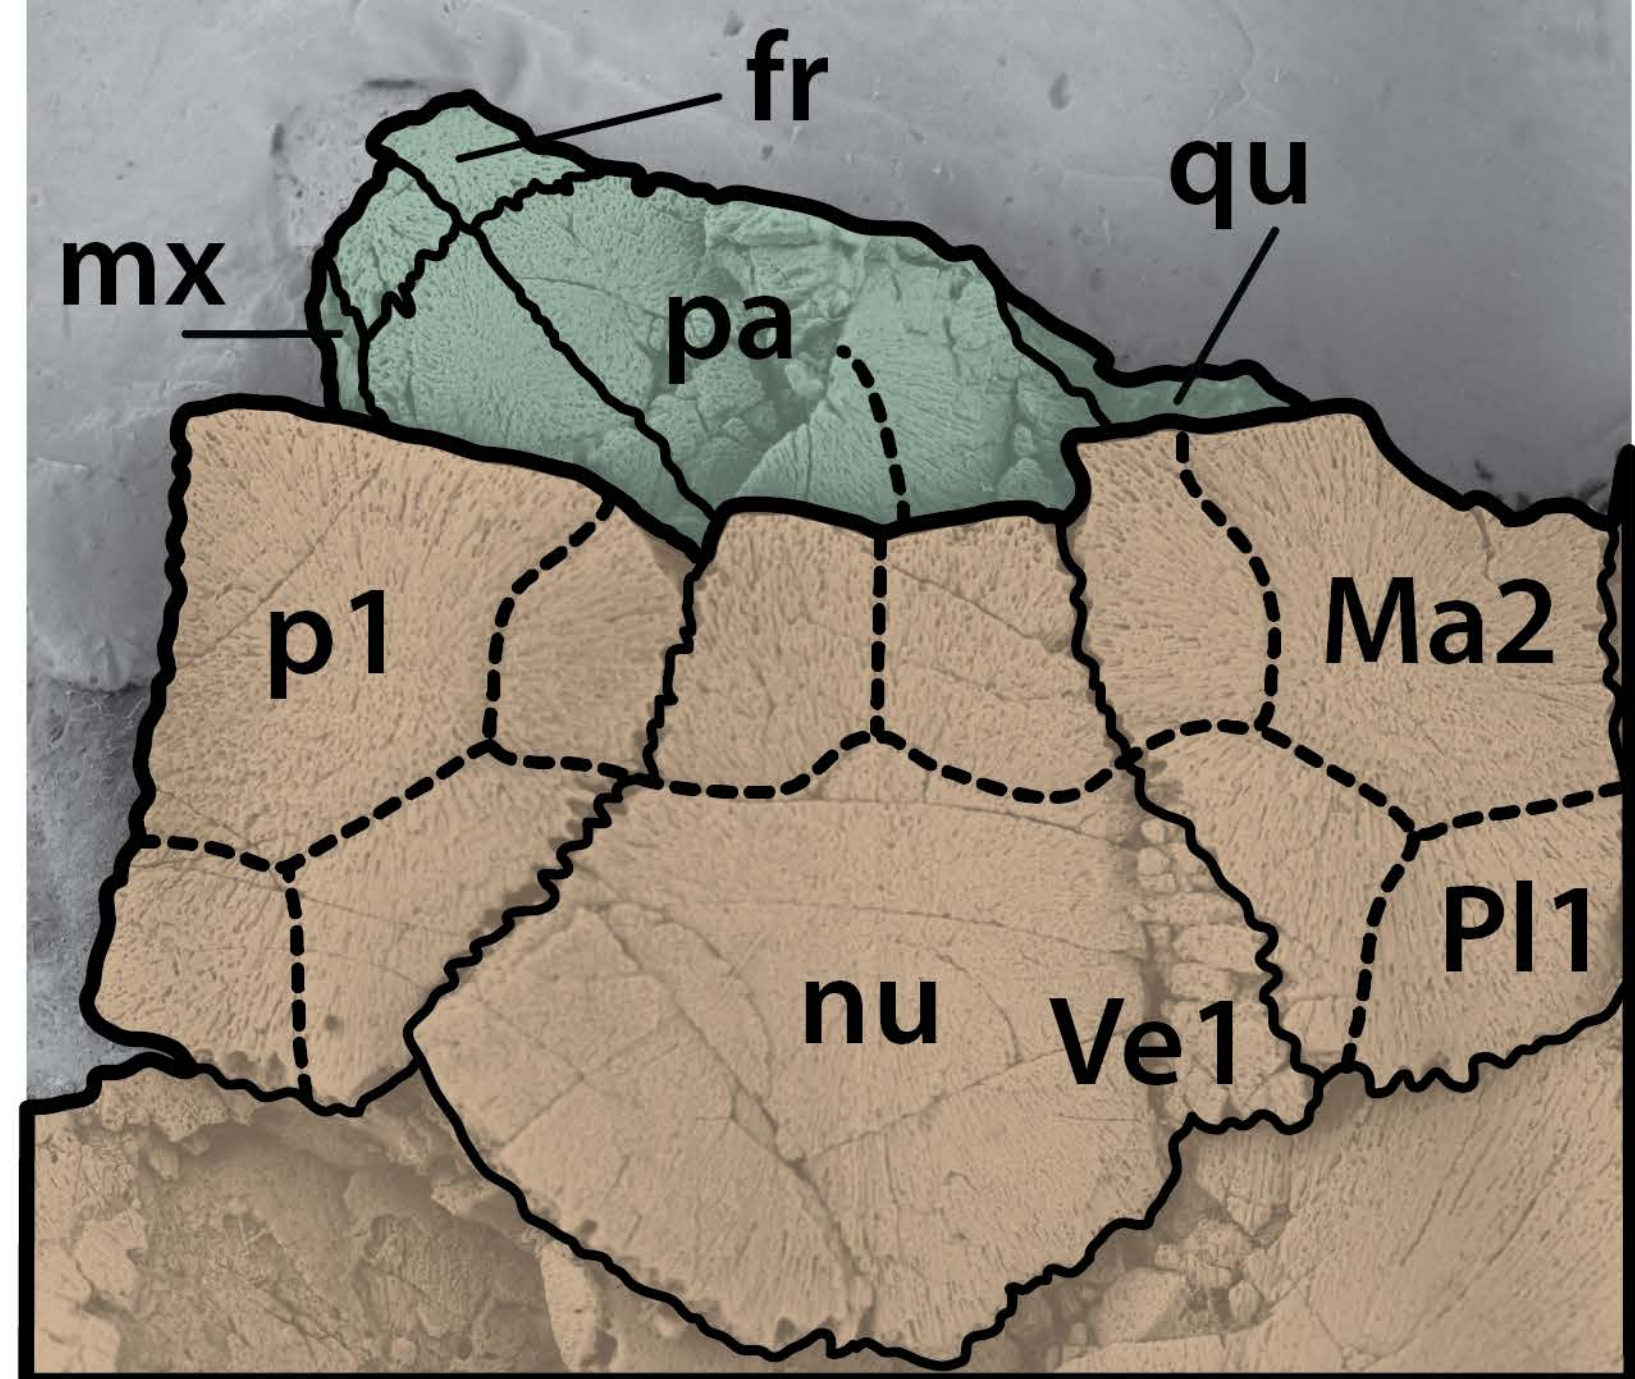

Skull dorsal view/nuchal and peripherals 1

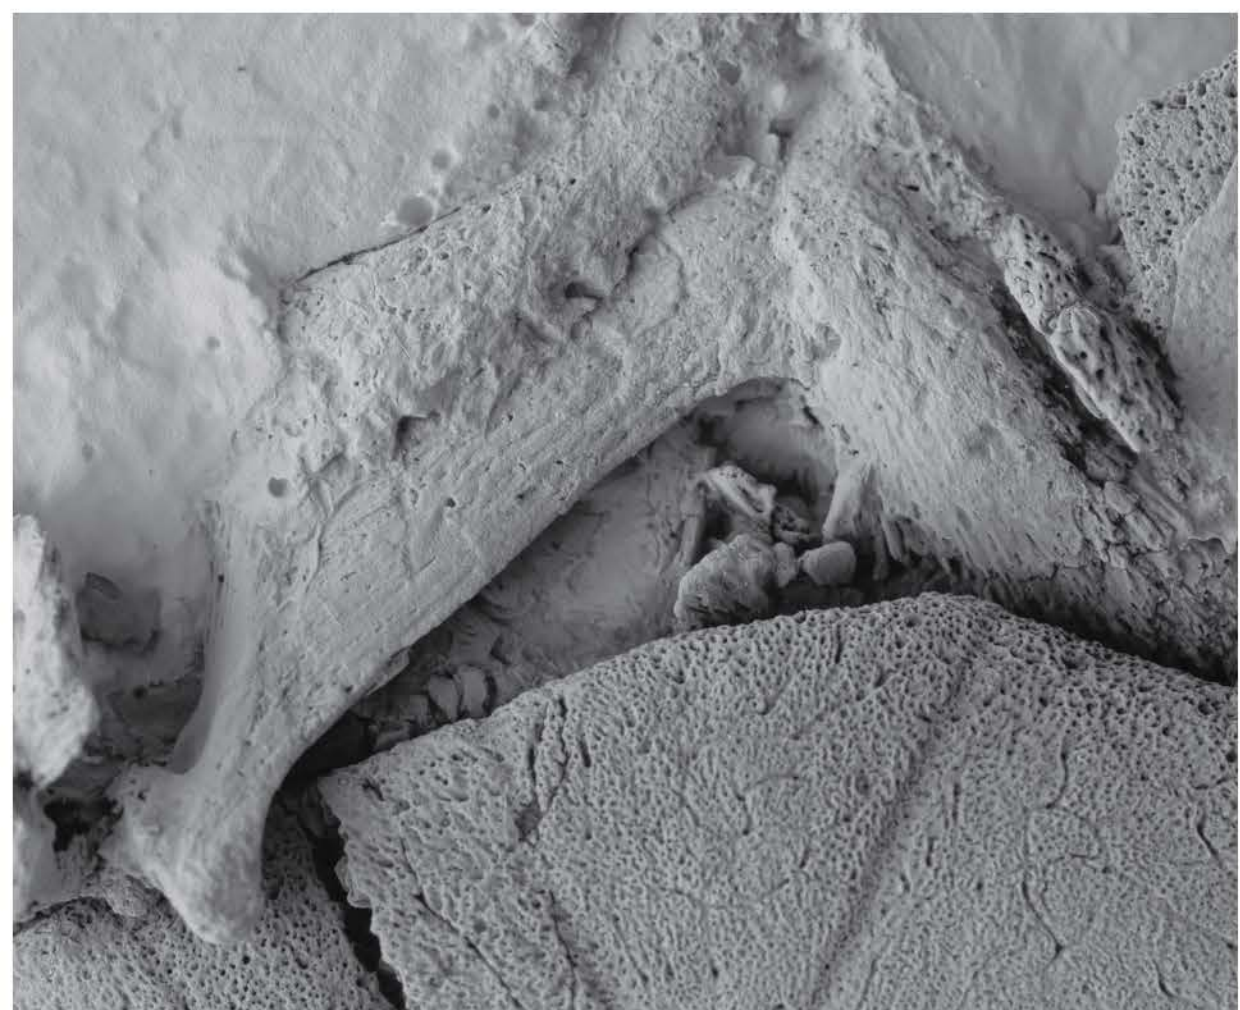

Lower jaw

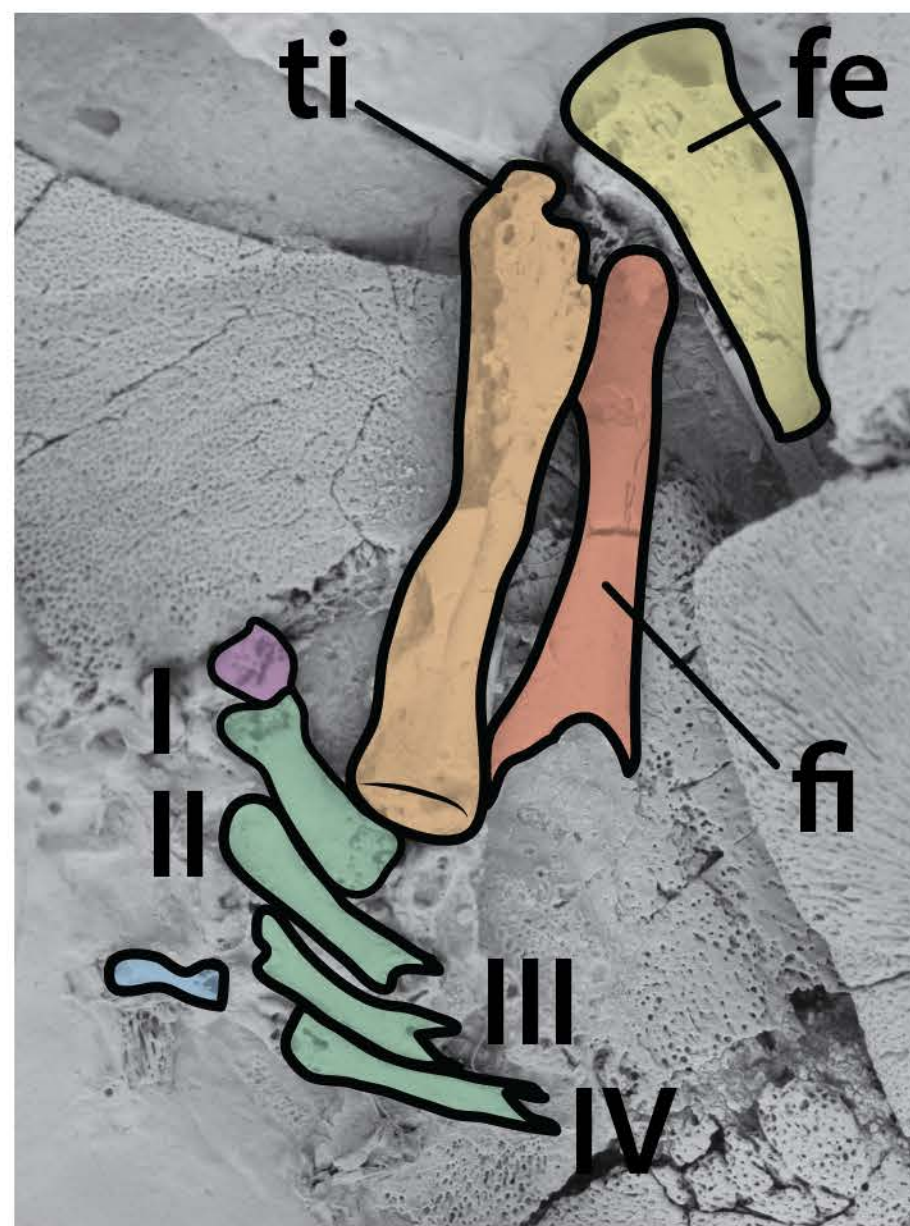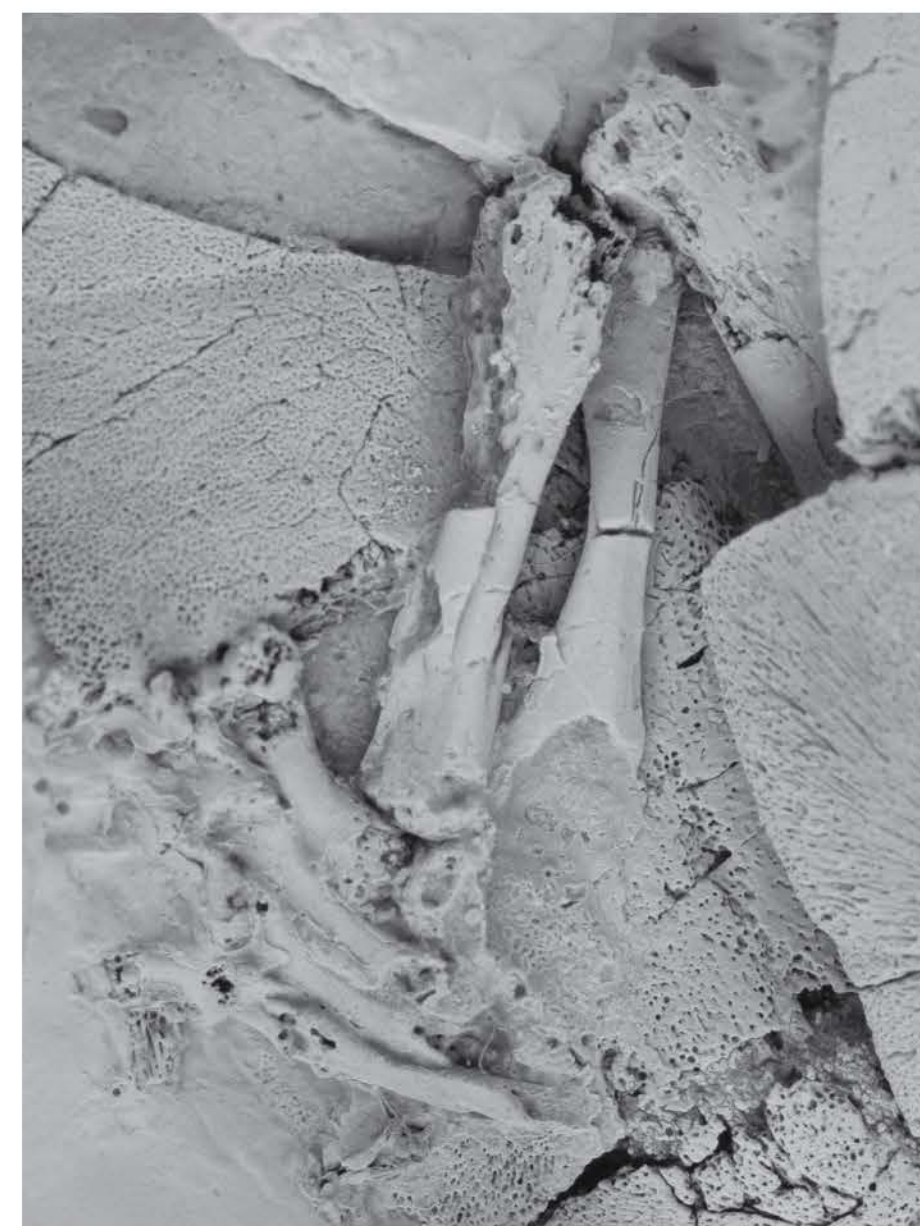

Right pes elements(top)-left femur-fibula (bottom)

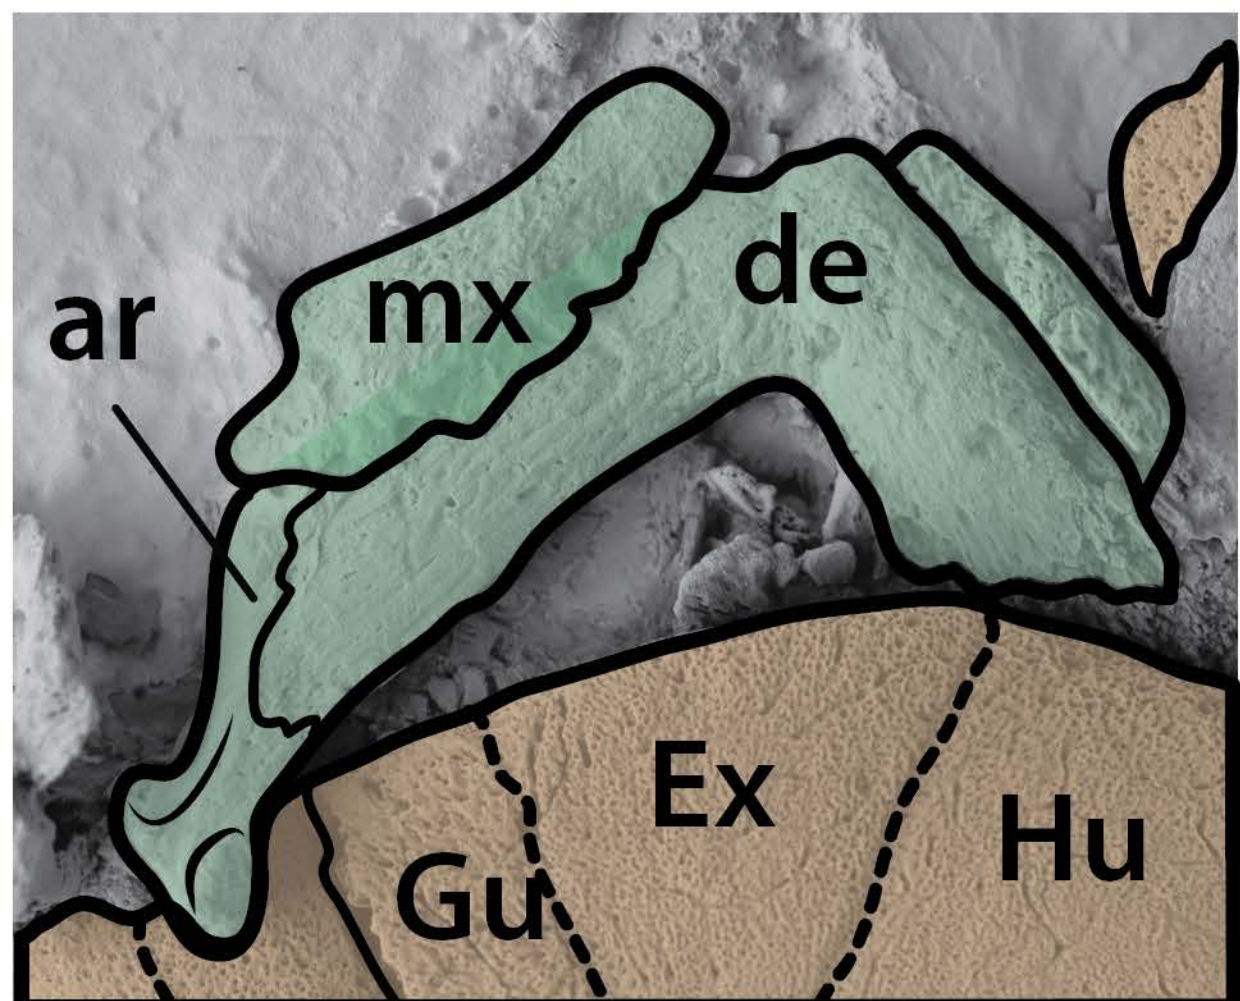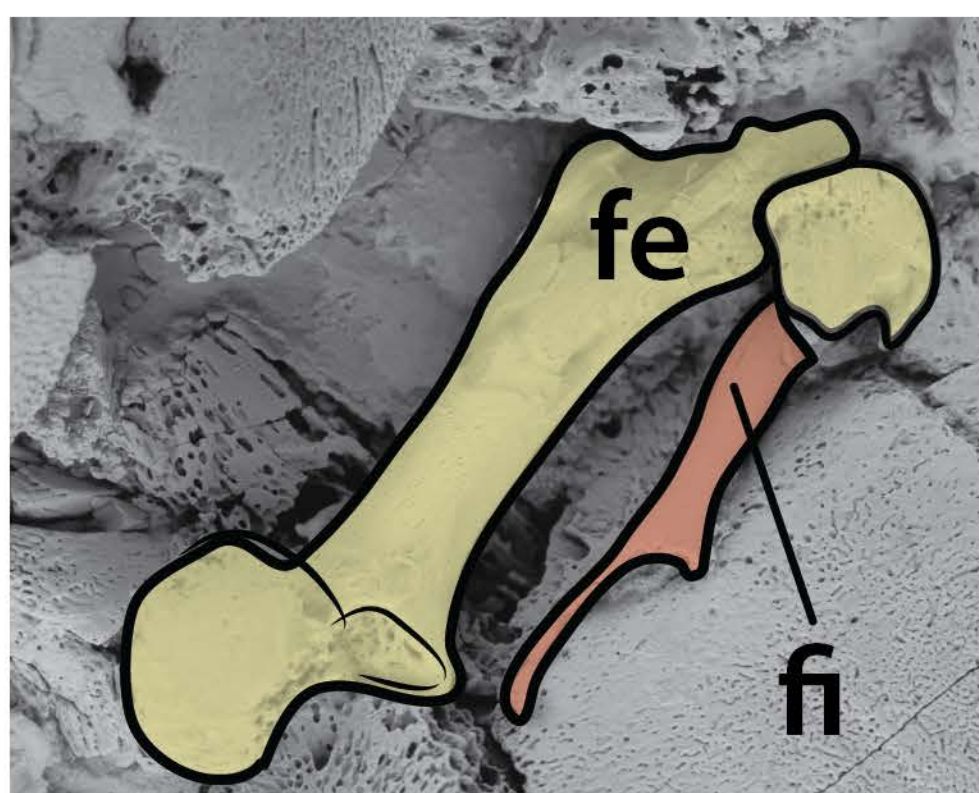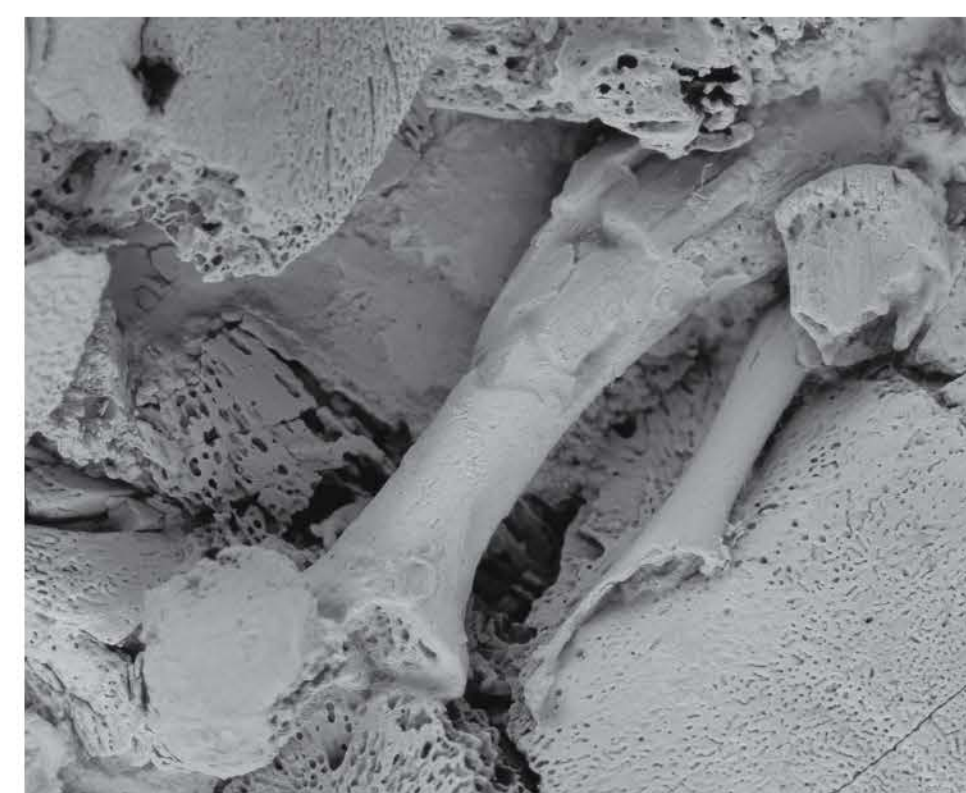



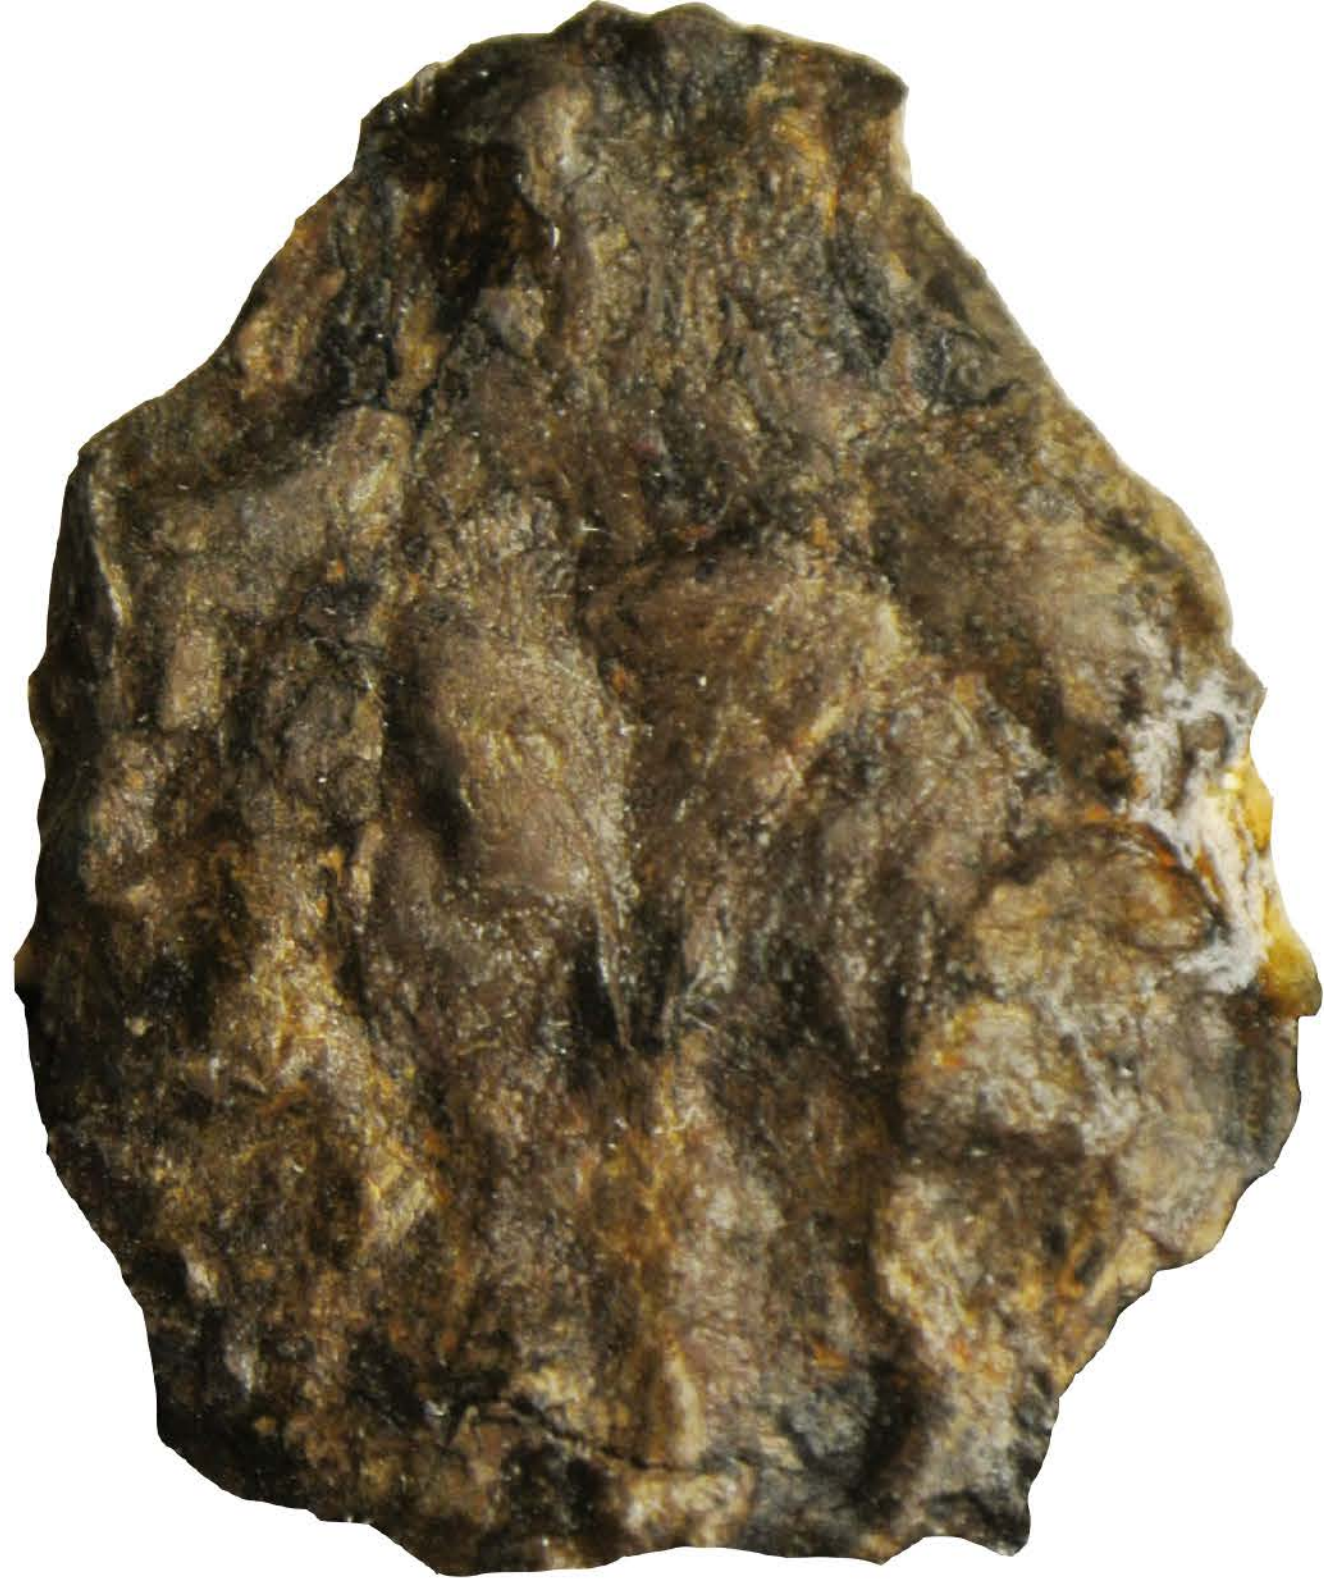

Skull dorsal view

0.5 cm

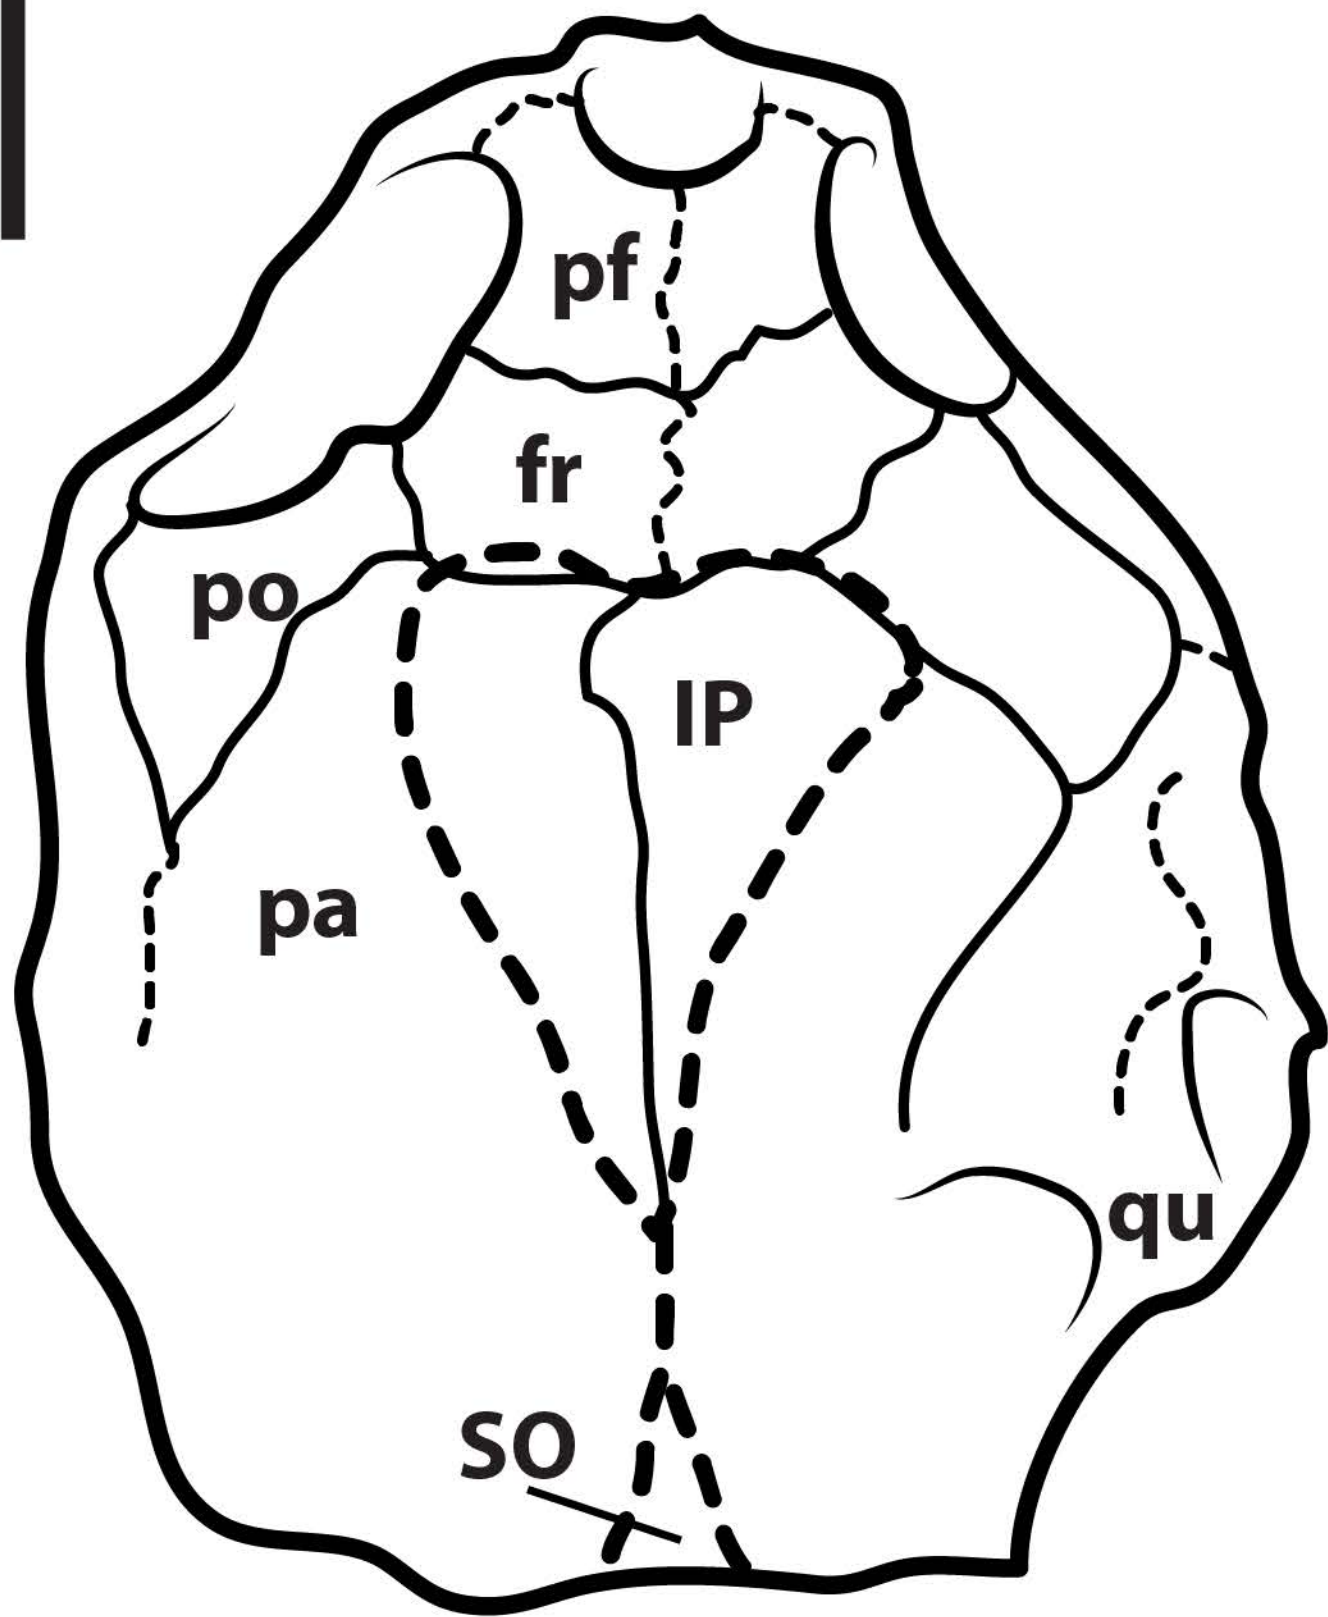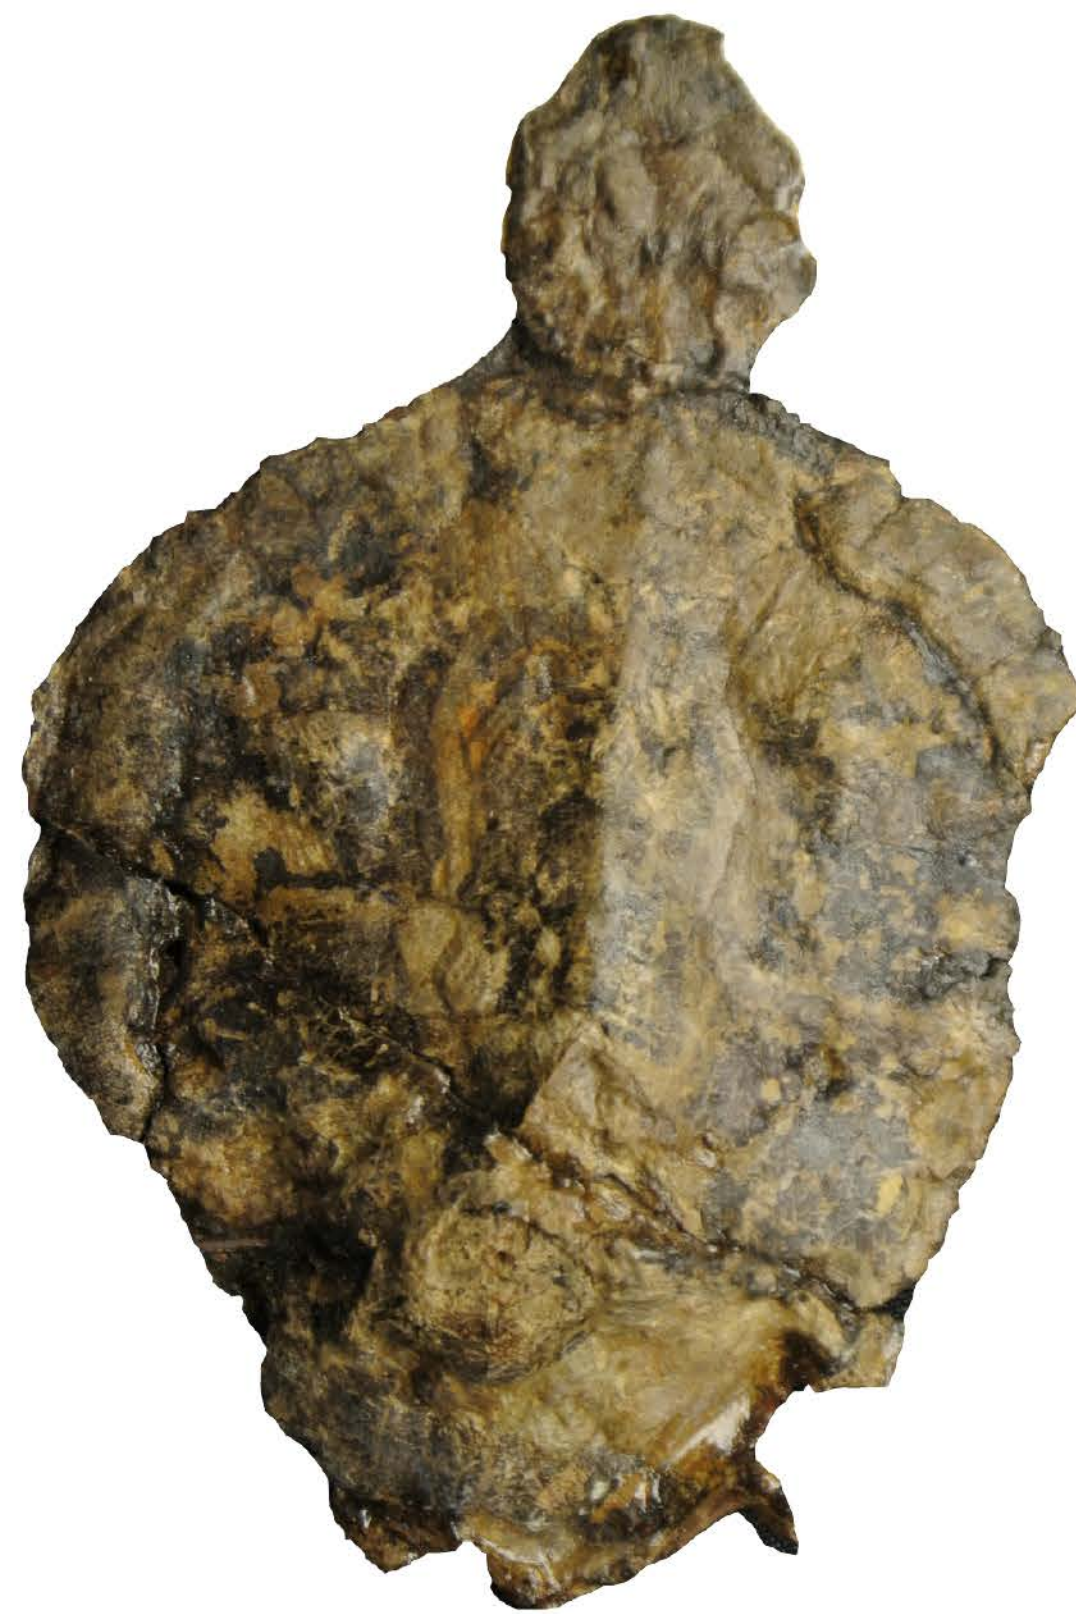

2 cm

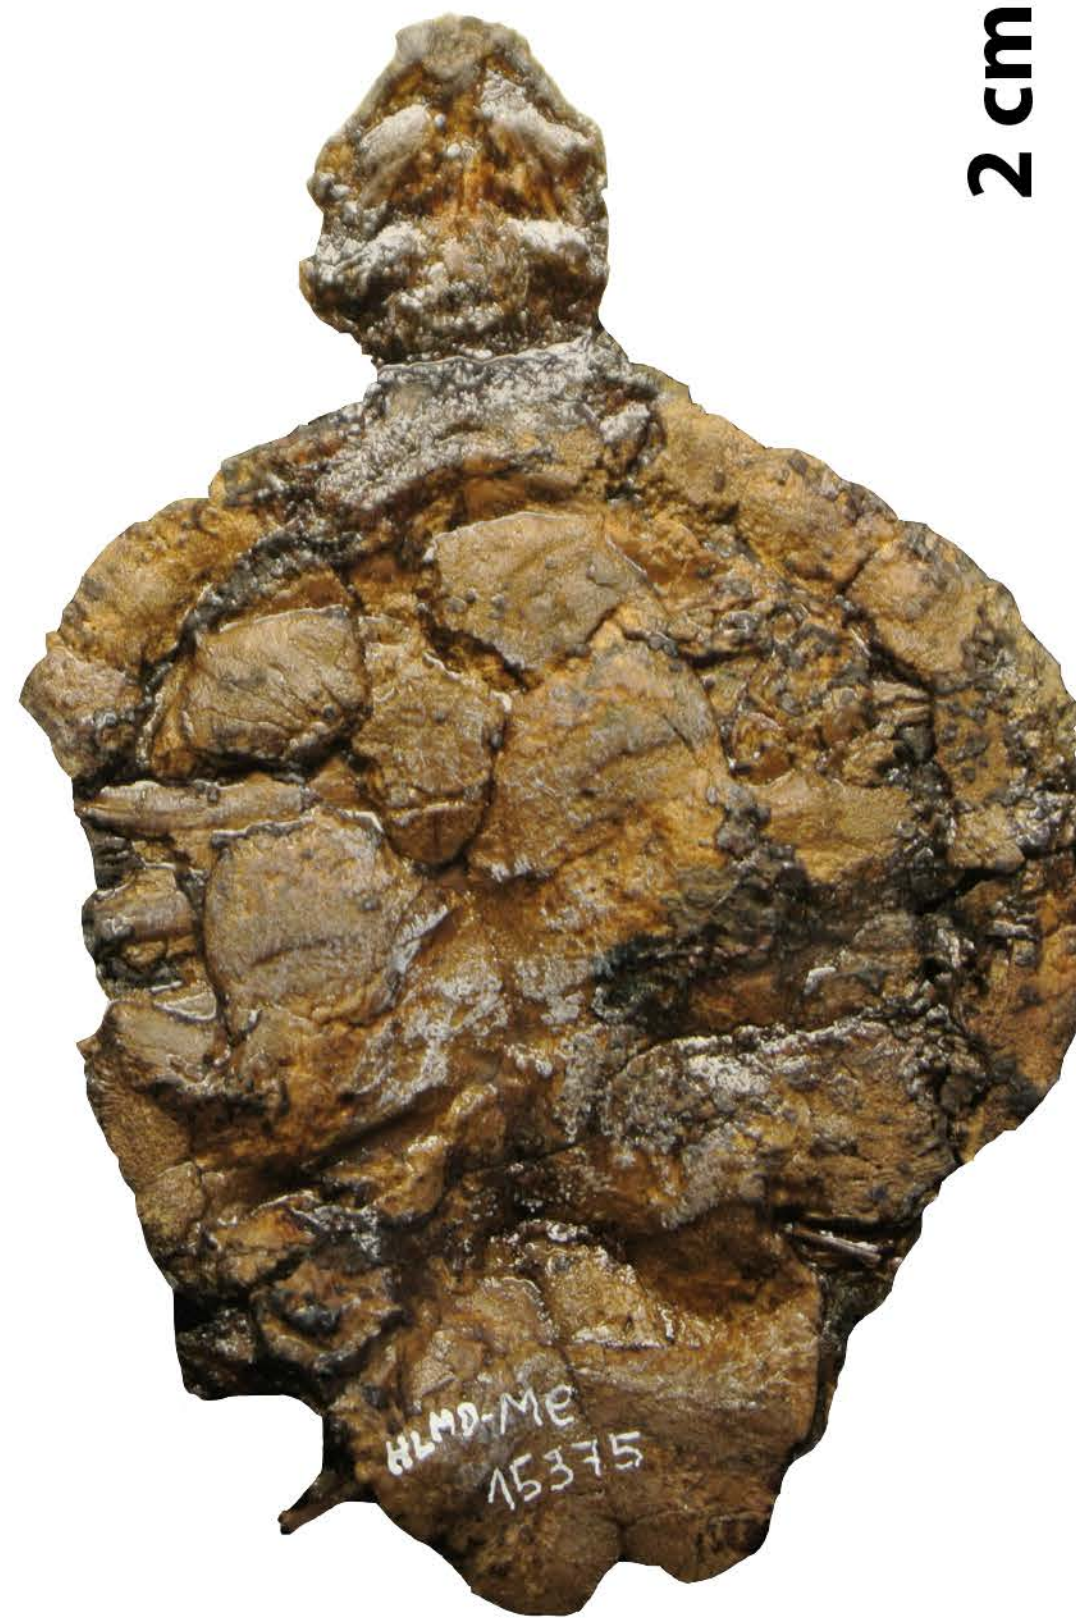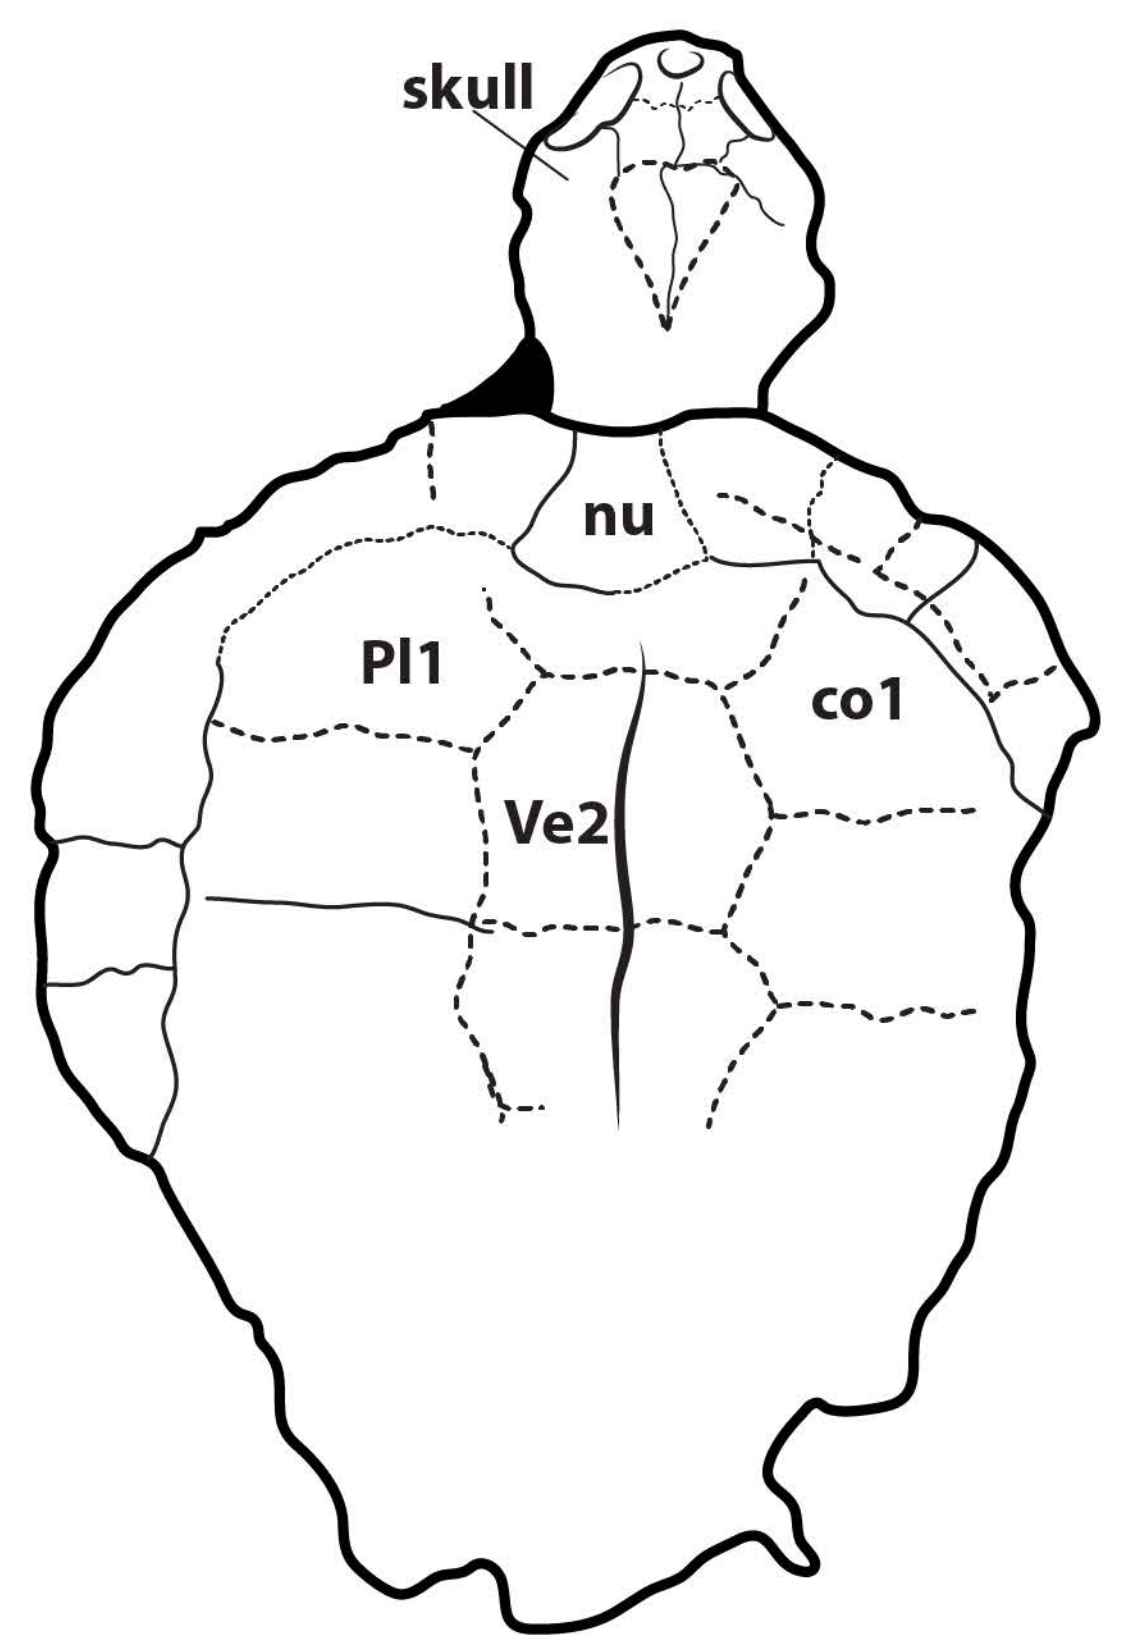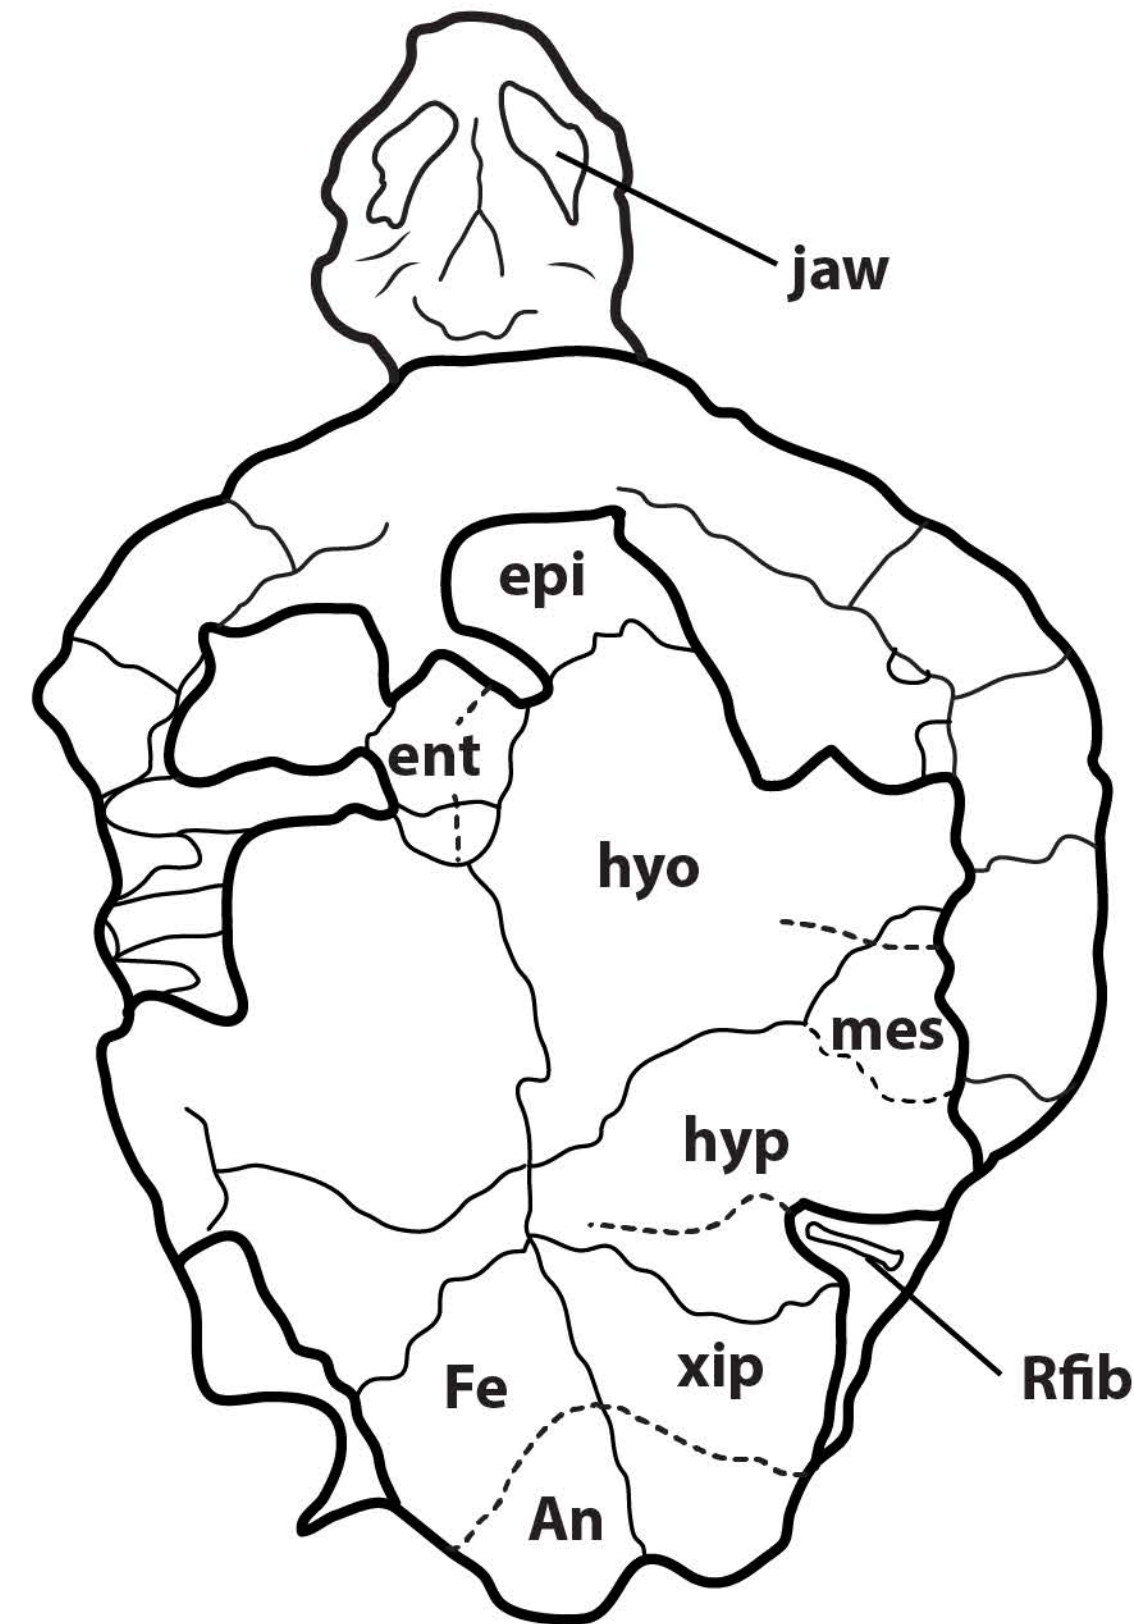

Plate 7. *Neochelys franzeni* HLMD ME 15375



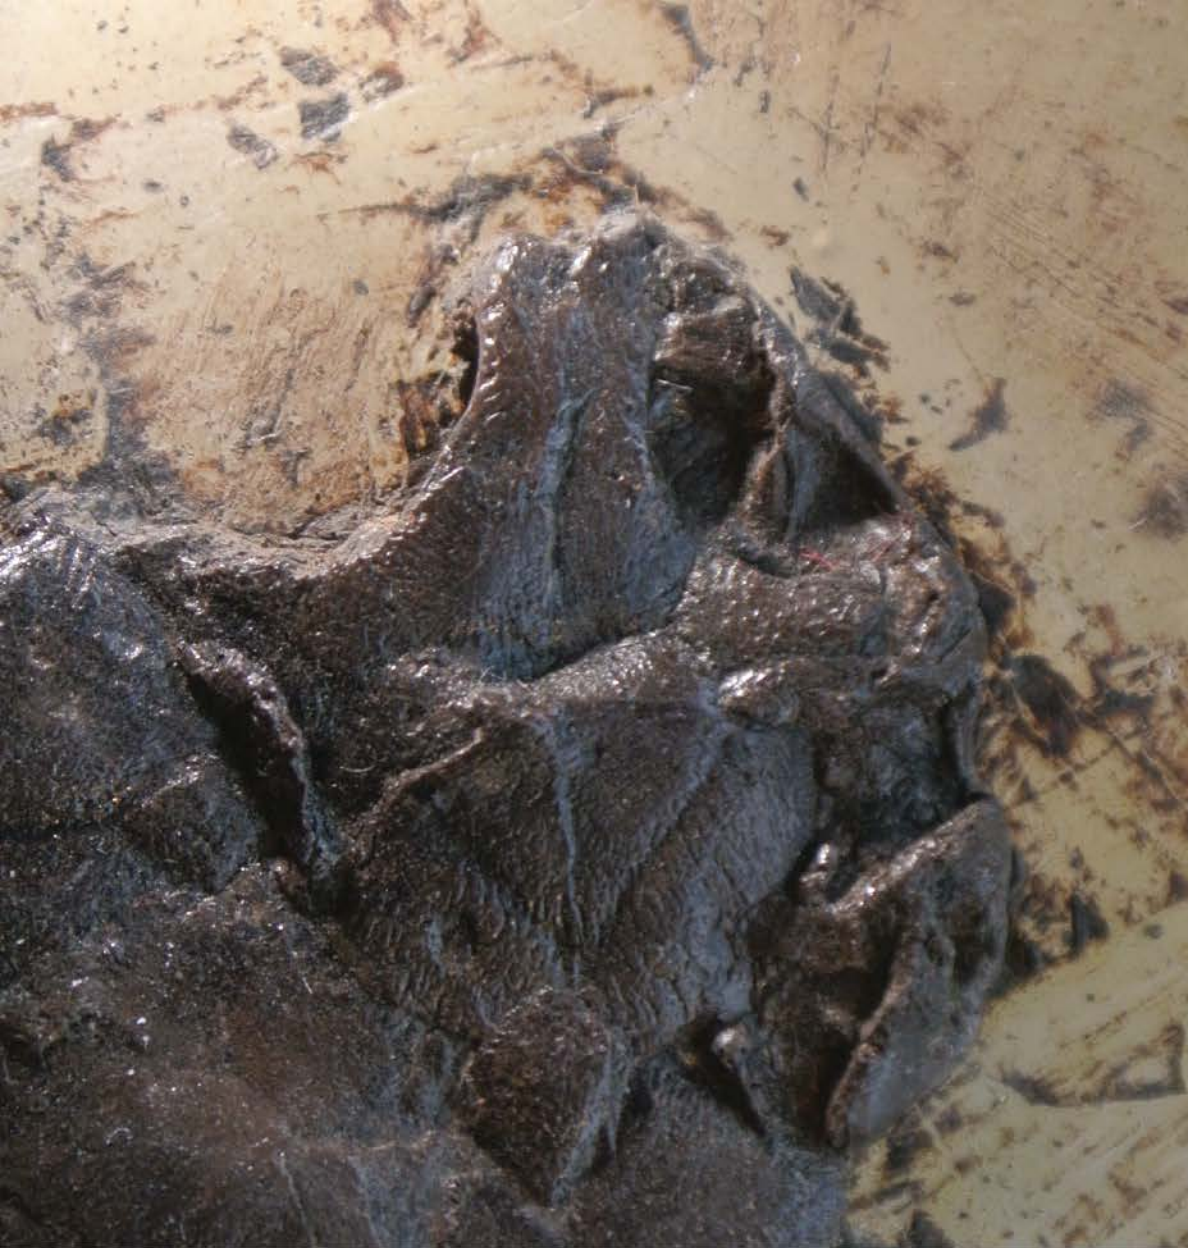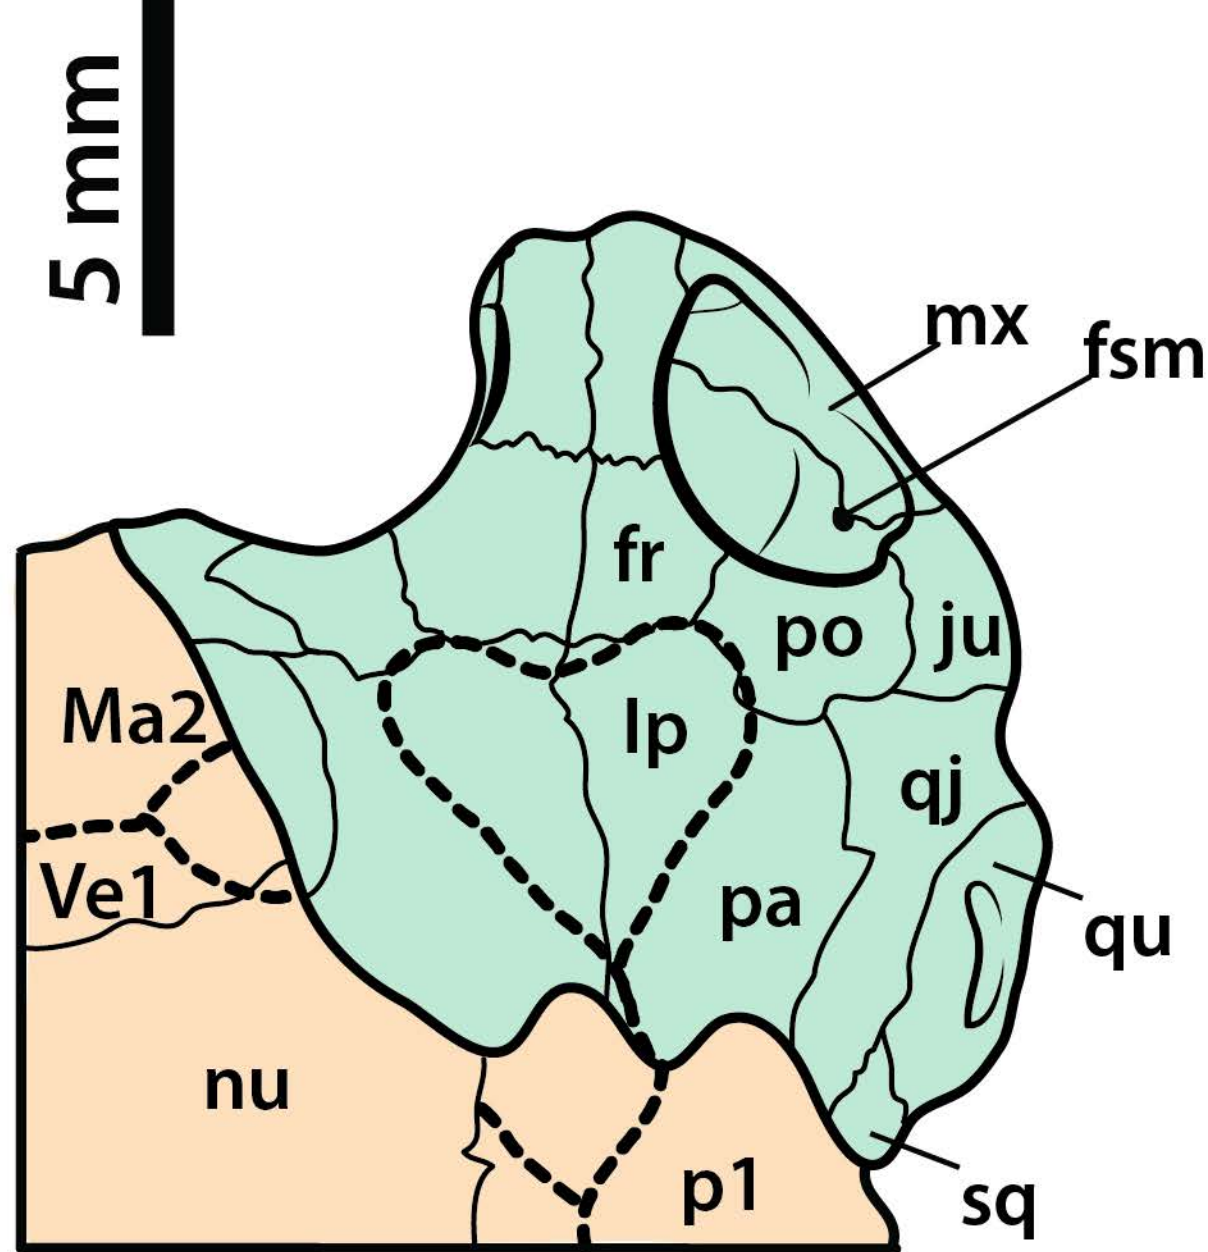

**Plate 8. *Neochelys franzeni* SNR 202/617**
